# Supplementary material for: Understanding Cell Model Characteristics—RNA Expression Profiling in Primary and Immortalized Human Mesothelial Cells, and in Human Vein and Microvascular Endothelial Cells
Source: Cells. 2022 Oct 5;11(19):3133. doi: 10.3390/cells11193133 (PMC9563025; doi:10.3390/cells11193133)
Supplement: Supplementary file 1 [file cells-11-03133-s001.zip]

Archive with 9 entries (9 files):
- Supplemental figures_revised.pdf
- Supplemental figures_revised.pptx
- Supplemental table S1_Genes specific for cell type in 1 vs 1 comparison Endothelial.xlsx
- Supplemental table S2_Genes specific for cell type in 1 vs 1 comparison.xlsx
- Supplemental table S3_Genes specific for 393 mesothelial genes.xlsx
- Supplemental table S4_Genes specific for 235 endothelial genes.xlsx
- Supplemental table S5_DEG between mesothelial and endothelial cells.xlsx
- Supplemental table S6_Mesothelium terms.xlsx
- Supplemental table S7_Endothelium terms.xlsx
