# Supplementary material for: Understanding Cell Model Characteristics—RNA Expression Profiling in Primary and Immortalized Human Mesothelial Cells, and in Human Vein and Microvascular Endothelial Cells
Source: Cells. 2022 Oct 5;11(19):3133. doi: 10.3390/cells11193133 (PMC9563025; doi:10.3390/cells11193133)
Supplement: Supplementary file 1 [file cells-11-03133-s001.zip › Supplemental table S1_Genes specific for cell type in 1 vs 1 comparison Endothelial.xlsx]

## Sheet: HUVEC
HUVEC specific GO enrichment analysis
PANTHER GO Biological process	reference list	observed	expected	Fold Enrichment	+/-	raw P value	FDR
thyroid gland development	25	6	0.49	+	12.17	2.46e-05	0.0483
embryonic skeletal system morphogenesis	95	15	1.87	+	8.01	3.37e-09	5.29e-05
embryonic skeletal system development	123	16	2.42	+	6.6	1.23e-08	9.66e-05
anterior/posterior pattern specification	202	20	3.98	+	5.02	1.35e-08	7.07e-05
skeletal system morphogenesis	223	18	4.4	+	4.09	1.17e-06	0.00368
embryonic organ morphogenesis	292	21	5.76	+	3.65	8.84e-07	0.00347
regionalization	316	21	6.23	+	3.37	2.87e-06	0.00751
skeletal system development	478	25	9.42	+	2.65	1.79e-05	0.0402
PANTHER GO Cellular Component	reference list	observed	expected	Fold Enrichment	+/-	raw P value	FDR
kinetochore	134	12	2.64	+	4.54	2.78e-05	0.0276
condensed chromosome, centromeric region	144	12	2.84	+	4.23	5.33e-05	0.0353
chromosome, centromeric region	199	13	3.92	+	3.31	0.000262	0.0472
condensed chromosome	244	15	4.81	+	3.12	0.000169	0.056
chromosomal region	336	18	6.62	+	2.72	0.000201	0.04
chromosome	1772	65	34.93	+	1.86	1.9e-06	0.00378
vesicle	3932	47	77.51	-	0.61	6.85e-05	0.034
extracellular vesicle	2118	20	41.75	-	0.48	0.000173	0.0492
extracellular organelle	2120	20	41.79	-	0.48	0.000174	0.0432
extracellular membrane-bounded organelle	2120	20	41.79	-	0.48	0.000174	0.0384
extracellular exosome	2098	19	41.36	-	0.46	8.38e-05	0.0333
PANTHER GO Molecular Function	reference list	observed	expected	Fold Enrichment	+/-	raw P value	FDR
DNA-binding transcription activator activity	460	24	9.07	+	2.65	2.73e-05	0.0102
DNA-binding transcription activator activity, RNA polymerase II-specific	454	23	8.95	+	2.57	6.14e-05	0.0214
DNA-binding transcription factor activity, RNA polymerase II-specific	1390	61	27.4	+	2.23	8.52e-09	4.16e-05
DNA-binding transcription factor activity	1443	62	28.45	+	2.18	1.48e-08	3.6e-05
RNA polymerase II cis-regulatory region sequence-specific DNA binding	1203	51	23.72	+	2.15	6.6e-07	0.000403
RNA polymerase II transcription regulatory region sequence-specific DNA binding	1430	60	28.19	+	2.13	7.19e-08	8.77e-05
cis-regulatory region sequence-specific DNA binding	1223	51	24.11	+	2.12	8.35e-07	0.000408
transcription cis-regulatory region binding	1526	61	30.08	+	2.03	3.1e-07	0.000252
transcription regulatory region nucleic acid binding	1528	61	30.12	+	2.03	3.15e-07	0.000219
sequence-specific DNA binding	1687	66	33.26	+	1.98	1.53e-07	0.00015
sequence-specific double-stranded DNA binding	1582	61	31.19	+	1.96	8.29e-07	0.000449
double-stranded DNA binding	1679	62	33.1	+	1.87	2.66e-06	0.00118
DNA binding	2494	90	49.17	+	1.83	2.59e-08	4.21e-05
transcription regulator activity	1942	63	38.28	+	1.65	0.000112	0.0363
binding	16519	360	325.65	+	1.11	8.93e-06	0.00363

## Sheet: HCMEC
HCMEC specific GO enrichment analysis
PANTHER GO Biological process	reference list	observed	expected	Fold Enrichment	+/-	raw P value	FDR
ureteric bud elongation	5	3	0.1	+	30.07	0.000387	0.0244
hindgut morphogenesis	6	3	0.12	+	25.05	0.000572	0.0333
metanephric glomerulus vasculature development	6	3	0.12	+	25.05	0.000572	0.0332
tricuspid valve development	6	3	0.12	+	25.05	0.000572	0.0331
hindgut development	7	3	0.14	+	21.48	0.000806	0.0418
heart valve formation	13	5	0.26	+	19.27	1.94e-05	0.00239
metanephric renal vesicle morphogenesis	11	4	0.22	+	18.22	0.000166	0.0129
endocardial cushion formation	22	8	0.44	+	18.22	8.06e-08	3.09e-05
epithelial to mesenchymal transition involved in endocardial cushion formation	11	4	0.22	+	18.22	0.000166	0.0128
renal vesicle development	14	5	0.28	+	17.9	2.59e-05	0.00293
cardiac right ventricle morphogenesis	19	6	0.38	+	15.82	6.99e-06	0.00113
renal vesicle morphogenesis	13	4	0.26	+	15.42	0.000281	0.0194
atrioventricular valve development	27	8	0.54	+	14.85	2.97e-07	8.06e-05
cell migration involved in heart development	14	4	0.28	+	14.32	0.000356	0.0231
venous blood vessel development	14	4	0.28	+	14.32	0.000356	0.023
metanephric nephron morphogenesis	21	6	0.42	+	14.32	1.13e-05	0.0016
endocardial cushion morphogenesis	35	10	0.7	+	14.32	1.28e-08	7.43e-06
metanephric nephron development	32	9	0.64	+	14.09	7.75e-08	3.12e-05
cell surface receptor signaling pathway involved in heart development	23	6	0.46	+	13.07	1.75e-05	0.00226
atrioventricular valve morphogenesis	24	6	0.48	+	12.53	2.16e-05	0.00255
cardiac myofibril assembly	16	4	0.32	+	12.53	0.000546	0.032
endocardial cushion development	44	11	0.88	+	12.53	7.78e-09	5.56e-06
mesenchyme morphogenesis	51	12	1.02	+	11.79	2.91e-09	3.05e-06
nephron tubule formation	17	4	0.34	+	11.79	0.000664	0.0367
anatomical structure regression	17	4	0.34	+	11.79	0.000664	0.0366
mesenchymal cell proliferation	17	4	0.34	+	11.79	0.000664	0.0365
branch elongation of an epithelium	17	4	0.34	+	11.79	0.000664	0.0364
regulation of non-canonical Wnt signaling pathway	26	6	0.52	+	11.56	3.19e-05	0.00348
metanephros morphogenesis	27	6	0.54	+	11.14	3.83e-05	0.00404
cell differentiation involved in metanephros development	18	4	0.36	+	11.14	0.000799	0.0417
kidney mesenchyme development	18	4	0.36	+	11.14	0.000799	0.0416
aortic valve morphogenesis	32	7	0.64	+	10.96	9.34e-06	0.0014
positive regulation of mesenchymal cell proliferation	23	5	0.46	+	10.89	0.00019	0.0143
middle ear morphogenesis	19	4	0.38	+	10.55	0.000952	0.0472
negative regulation of chondrocyte differentiation	24	5	0.48	+	10.44	0.000226	0.0166
cardiac epithelial to mesenchymal transition	26	5	0.52	+	9.64	0.000313	0.021
aortic valve development	37	7	0.74	+	9.48	2.14e-05	0.00255
cardiac conduction system development	38	7	0.76	+	9.23	2.49e-05	0.00286
negative regulation of biomineral tissue development	28	5	0.56	+	8.95	0.000423	0.0261
embryonic cranial skeleton morphogenesis	46	8	0.92	+	8.71	9.5e-06	0.0014
negative regulation of biomineralization	29	5	0.58	+	8.64	0.000488	0.0294
embryonic digit morphogenesis	58	10	1.16	+	8.64	7.79e-07	0.000173
semi-lunar valve development	41	7	0.82	+	8.56	3.84e-05	0.00403
negative regulation of cartilage development	30	5	0.6	+	8.35	0.00056	0.0327
heart valve morphogenesis	55	9	1.1	+	8.2	4.1e-06	0.000732
embryonic forelimb morphogenesis	31	5	0.62	+	8.08	0.00064	0.0358
regulation of mesenchymal cell proliferation	31	5	0.62	+	8.08	0.00064	0.0357
regulation of kidney development	32	5	0.64	+	7.83	0.000728	0.0391
regulation of morphogenesis of an epithelium	65	10	1.3	+	7.71	1.97e-06	0.000382
heart valve development	65	10	1.3	+	7.71	1.97e-06	0.000377
glomerulus development	52	8	1.04	+	7.71	2.11e-05	0.00255
nephron morphogenesis	66	10	1.32	+	7.59	2.23e-06	0.000417
negative regulation of striated muscle cell differentiation	34	5	0.68	+	7.37	0.000932	0.0469
hindlimb morphogenesis	34	5	0.68	+	7.37	0.000932	0.0468
positive regulation of epithelial to mesenchymal transition	49	7	0.98	+	7.16	0.000106	0.00895
nephron epithelium morphogenesis	64	9	1.28	+	7.05	1.24e-05	0.00174
collagen fibril organization	57	8	1.14	+	7.03	3.82e-05	0.00406
cardiac septum morphogenesis	66	9	1.32	+	6.83	1.55e-05	0.00204
digestive tract morphogenesis	44	6	0.88	+	6.83	0.000415	0.0259
mesonephric tubule morphogenesis	52	7	1.04	+	6.75	0.000148	0.012
outflow tract morphogenesis	67	9	1.34	+	6.73	1.72e-05	0.00224
chondrocyte differentiation	68	9	1.36	+	6.63	1.92e-05	0.00239
regulation of chondrocyte differentiation	53	7	1.06	+	6.62	0.000165	0.0128
mesenchymal cell development	84	11	1.68	+	6.56	2.52e-06	0.000466
negative regulation of osteoblast differentiation	46	6	0.92	+	6.54	0.000515	0.0304
cellular response to retinoic acid	69	9	1.38	+	6.54	2.13e-05	0.00256
negative regulation of smooth muscle cell proliferation	54	7	1.08	+	6.5	0.000183	0.0138
nephron tubule morphogenesis	62	8	1.24	+	6.47	6.56e-05	0.00629
nephron development	126	16	2.51	+	6.36	1.98e-08	1.07e-05
metanephros development	79	10	1.58	+	6.34	9.46e-06	0.0014
regulation of JUN kinase activity	57	7	1.14	+	6.15	0.000248	0.0177
renal tubule morphogenesis	66	8	1.32	+	6.07	9.79e-05	0.00841
negative regulation of muscle cell differentiation	58	7	1.16	+	6.05	0.000273	0.019
kidney morphogenesis	83	10	1.66	+	6.04	1.4e-05	0.00192
epithelial to mesenchymal transition	75	9	1.5	+	6.01	3.88e-05	0.00404
cardiocyte differentiation	109	13	2.18	+	5.98	8.13e-07	0.000178
cardiac muscle cell development	59	7	1.18	+	5.95	0.000301	0.0205
embryonic limb morphogenesis	118	14	2.35	+	5.95	3.26e-07	8.39e-05
embryonic appendage morphogenesis	118	14	2.35	+	5.95	3.26e-07	8.26e-05
ureteric bud morphogenesis	51	6	1.02	+	5.9	0.000845	0.0434
nephron tubule development	77	9	1.54	+	5.86	4.68e-05	0.00475
roof of mouth development	86	10	1.72	+	5.83	1.86e-05	0.00236
cranial skeletal system development	69	8	1.38	+	5.81	0.00013	0.0107
regulation of transcription regulatory region DNA binding	52	6	1.04	+	5.78	0.000928	0.0469
limb morphogenesis	140	16	2.79	+	5.73	7.53e-08	3.29e-05
appendage morphogenesis	140	16	2.79	+	5.73	7.53e-08	3.2e-05
nephron epithelium development	98	11	1.96	+	5.62	9.69e-06	0.00141
mesenchymal cell differentiation	162	18	3.23	+	5.57	1.72e-08	9.64e-06
renal tubule development	81	9	1.62	+	5.57	6.72e-05	0.0064
regulation of cartilage development	72	8	1.44	+	5.57	0.00017	0.013
regulation of epithelial to mesenchymal transition	91	10	1.82	+	5.51	2.9e-05	0.00324
cardiac cell development	64	7	1.28	+	5.48	0.000472	0.0288
cardiac muscle cell differentiation	83	9	1.66	+	5.43	7.98e-05	0.00721
mesenchyme development	224	24	4.47	+	5.37	1.38e-10	2.4e-07
cartilage development	152	16	3.03	+	5.27	2.11e-07	6.51e-05
embryonic skeletal system morphogenesis	95	10	1.9	+	5.27	4.07e-05	0.00418
regulation of striated muscle cell differentiation	86	9	1.72	+	5.24	0.000103	0.00871
stem cell differentiation	157	16	3.13	+	5.11	3.16e-07	8.27e-05
neural crest cell development	79	8	1.58	+	5.07	0.000304	0.0205
ureteric bud development	80	8	1.6	+	5.01	0.000329	0.0219
ventricular septum development	70	7	1.4	+	5.01	0.000773	0.0409
cardiac ventricle morphogenesis	70	7	1.4	+	5.01	0.000773	0.0408
response to retinoic acid	111	11	2.22	+	4.97	2.83e-05	0.00317
mesonephric tubule development	81	8	1.62	+	4.95	0.000356	0.0229
mesonephric epithelium development	81	8	1.62	+	4.95	0.000356	0.0228
lung development	173	17	3.45	+	4.92	2.18e-07	6.58e-05
limb development	174	17	3.47	+	4.9	2.35e-07	6.97e-05
appendage development	174	17	3.47	+	4.9	2.35e-07	6.84e-05
embryonic skeletal system development	123	12	2.45	+	4.89	1.42e-05	0.00189
cardiac septum development	103	10	2.06	+	4.86	7.63e-05	0.00693
respiratory tube development	177	17	3.53	+	4.81	2.94e-07	8.1e-05
regulation of animal organ morphogenesis	125	12	2.49	+	4.81	1.65e-05	0.00216
kidney epithelium development	126	12	2.51	+	4.77	1.78e-05	0.00227
stem cell development	84	8	1.68	+	4.77	0.000446	0.0273
regulation of biomineral tissue development	95	9	1.9	+	4.75	0.000206	0.0152
mesonephros development	85	8	1.7	+	4.72	0.000479	0.029
regulation of biomineralization	97	9	1.94	+	4.65	0.000237	0.0172
regulation of osteoblast differentiation	120	11	2.39	+	4.59	5.46e-05	0.0054
branching morphogenesis of an epithelial tube	131	12	2.61	+	4.59	2.54e-05	0.00289
gland morphogenesis	99	9	1.98	+	4.56	0.000273	0.0191
respiratory system development	199	18	3.97	+	4.53	2.99e-07	7.97e-05
extracellular matrix organization	266	24	5.31	+	4.52	3.29e-09	3.23e-06
neural crest cell differentiation	89	8	1.78	+	4.5	0.000636	0.0357
extracellular structure organization	267	24	5.33	+	4.5	3.52e-09	3.25e-06
positive regulation of MAP kinase activity	112	10	2.24	+	4.47	0.000145	0.0119
external encapsulating structure organization	269	24	5.37	+	4.47	4.03e-09	3.52e-06
connective tissue development	202	18	4.03	+	4.47	3.67e-07	9.16e-05
epithelial cell proliferation	90	8	1.8	+	4.45	0.000681	0.0372
cardiac muscle tissue development	171	15	3.41	+	4.4	4.13e-06	0.000729
digestive tract development	126	11	2.51	+	4.37	8.21e-05	0.00733
regulation of ossification	115	10	2.29	+	4.36	0.000177	0.0134
regulation of BMP signaling pathway	93	8	1.86	+	4.31	0.000831	0.0428
regulation of epithelial cell differentiation	141	12	2.81	+	4.26	4.95e-05	0.00496
cardiac chamber morphogenesis	119	10	2.37	+	4.21	0.000229	0.0167
bone morphogenesis	96	8	1.92	+	4.18	0.00101	0.0496
regulation of muscle cell differentiation	132	11	2.63	+	4.18	0.000121	0.01
actomyosin structure organization	108	9	2.16	+	4.18	0.000495	0.0295
odontogenesis	121	10	2.41	+	4.14	0.00026	0.0183
cardiac ventricle development	123	10	2.45	+	4.07	0.000293	0.0202
morphogenesis of a branching epithelium	160	13	3.19	+	4.07	3.79e-05	0.00406
digestive system development	136	11	2.71	+	4.05	0.000154	0.0122
glycosaminoglycan metabolic process	112	9	2.24	+	4.03	0.000632	0.0356
developmental growth involved in morphogenesis	115	9	2.29	+	3.92	0.000754	0.04
kidney development	282	22	5.63	+	3.91	1.62e-07	5.55e-05
osteoblast differentiation	129	10	2.57	+	3.88	0.000418	0.026
determination of bilateral symmetry	129	10	2.57	+	3.88	0.000418	0.0259
specification of symmetry	130	10	2.59	+	3.85	0.000442	0.0271
morphogenesis of a branching structure	169	13	3.37	+	3.85	6.41e-05	0.00618
muscle tissue development	303	23	6.05	+	3.8	1.34e-07	4.69e-05
neuron migration	119	9	2.37	+	3.79	0.000947	0.0472
renal system development	291	22	5.81	+	3.79	2.69e-07	7.68e-05
positive regulation of angiogenesis	160	12	3.19	+	3.76	0.000152	0.0121
positive regulation of vasculature development	160	12	3.19	+	3.76	0.000152	0.0121
regulation of MAP kinase activity	176	13	3.51	+	3.7	9.42e-05	0.00818
striated muscle tissue development	288	21	5.75	+	3.65	8.7e-07	0.000187
striated muscle cell differentiation	193	14	3.85	+	3.63	6.14e-05	0.00603
epithelial tube morphogenesis	305	22	6.09	+	3.61	5.66e-07	0.000133
embryonic organ morphogenesis	292	21	5.83	+	3.6	1.07e-06	0.000222
skeletal system morphogenesis	223	16	4.45	+	3.6	2.11e-05	0.00257
muscle cell differentiation	252	18	5.03	+	3.58	6.88e-06	0.00113
urogenital system development	324	23	6.47	+	3.56	4.07e-07	9.99e-05
cardiac chamber development	162	11	3.23	+	3.4	0.000625	0.0355
regulation of angiogenesis	280	19	5.59	+	3.4	7.64e-06	0.00121
regulation of vasculature development	284	19	5.67	+	3.35	9.23e-06	0.00139
homophilic cell adhesion via plasma membrane adhesion molecules	167	11	3.33	+	3.3	0.000791	0.0416
response to corticosteroid	168	11	3.35	+	3.28	0.000829	0.0428
positive regulation of developmental growth	169	11	3.37	+	3.26	0.000868	0.0444
muscle structure development	477	31	9.52	+	3.26	2.59e-08	1.31e-05
anterior/posterior pattern specification	202	13	4.03	+	3.22	0.000336	0.0221
morphogenesis of an epithelium	437	28	8.72	+	3.21	1.64e-07	5.49e-05
regulation of cellular response to growth factor stimulus	284	18	5.67	+	3.18	3.11e-05	0.00342
heart morphogenesis	238	15	4.75	+	3.16	0.000149	0.012
cell fate commitment	238	15	4.75	+	3.16	0.000149	0.0119
tissue morphogenesis	542	34	10.82	+	3.14	1.22e-08	7.38e-06
heart development	533	33	10.64	+	3.1	2.71e-08	1.33e-05
pattern specification process	425	26	8.48	+	3.07	1.04e-06	0.000218
tube development	845	51	16.86	+	3.02	7.81e-12	2.05e-08
embryonic organ development	433	26	8.64	+	3.01	1.44e-06	0.000287
tube morphogenesis	644	38	12.85	+	2.96	7.81e-09	5.34e-06
regulation of chemotaxis	221	13	4.41	+	2.95	0.000747	0.04
ear development	221	13	4.41	+	2.95	0.000747	0.0398
angiogenesis	310	18	6.19	+	2.91	9.03e-05	0.00793
regulation of transmembrane receptor protein serine/threonine kinase signaling pathway	245	14	4.89	+	2.86	0.000621	0.0354
regionalization	316	18	6.31	+	2.85	0.000113	0.00948
blood vessel morphogenesis	404	23	8.06	+	2.85	1.32e-05	0.00182
response to molecule of bacterial origin	337	19	6.73	+	2.83	8.38e-05	0.0074
muscle organ development	284	16	5.67	+	2.82	0.000302	0.0206
circulatory system development	870	49	17.36	+	2.82	2.02e-10	2.89e-07
blood vessel development	486	27	9.7	+	2.78	3.61e-06	0.000653
wound healing	325	18	6.49	+	2.78	0.000158	0.0124
vasculature development	509	28	10.16	+	2.76	2.85e-06	0.000521
negative regulation of peptidase activity	255	14	5.09	+	2.75	0.000899	0.0457
negative regulation of cell differentiation	641	35	12.79	+	2.74	1.87e-07	5.99e-05
skeletal system development	478	26	9.54	+	2.73	7.82e-06	0.00123
cell-cell adhesion via plasma-membrane adhesion molecules	258	14	5.15	+	2.72	0.001	0.0494
cell population proliferation	486	26	9.7	+	2.68	1.03e-05	0.00147
gland development	414	22	8.26	+	2.66	5.43e-05	0.0054
response to lipopolysaccharide	320	17	6.39	+	2.66	0.000378	0.024
epithelium development	962	51	19.2	+	2.66	6.18e-10	7.47e-07
growth	362	19	7.22	+	2.63	0.000201	0.015
animal organ morphogenesis	957	50	19.1	+	2.62	1.48e-09	1.66e-06
anatomical structure formation involved in morphogenesis	881	46	17.58	+	2.62	7.25e-09	5.42e-06
regulation of anatomical structure morphogenesis	908	47	18.12	+	2.59	1.04e-08	6.55e-06
negative regulation of developmental process	877	45	17.5	+	2.57	2.56e-08	1.34e-05
embryonic morphogenesis	568	29	11.34	+	2.56	7.46e-06	0.0012
tissue development	1597	81	31.87	+	2.54	2.11e-14	3.32e-10
negative regulation of locomotion	317	16	6.33	+	2.53	0.000934	0.0468
developmental growth	359	18	7.16	+	2.51	0.000494	0.0295
transmembrane receptor protein tyrosine kinase signaling pathway	406	20	8.1	+	2.47	0.000304	0.0206
regulation of body fluid levels	367	18	7.32	+	2.46	0.000631	0.0357
positive regulation of MAPK cascade	471	23	9.4	+	2.45	0.000175	0.0134
biological adhesion	958	46	19.12	+	2.41	1.12e-07	3.99e-05
regulation of nervous system development	438	21	8.74	+	2.4	0.00041	0.0257
cell adhesion	952	45	19	+	2.37	2.07e-07	6.52e-05
response to wounding	428	20	8.54	+	2.34	0.000706	0.0383
cell migration	840	39	16.76	+	2.33	2.19e-06	0.000414
embryo development ending in birth or egg hatching	633	29	12.63	+	2.3	7.46e-05	0.00694
chordate embryonic development	613	28	12.23	+	2.29	0.000107	0.00902
negative regulation of multicellular organismal process	991	45	19.78	+	2.28	6.92e-07	0.000158
enzyme linked receptor protein signaling pathway	598	27	11.93	+	2.26	0.000164	0.0128
regulation of cell migration	894	40	17.84	+	2.24	4.47e-06	0.000755
positive regulation of cell migration	522	23	10.42	+	2.21	0.000724	0.039
regulation of multicellular organismal development	1294	57	25.82	+	2.21	3.87e-08	1.85e-05
positive regulation of cell motility	547	24	10.92	+	2.2	0.00054	0.0318
response to lipid	829	36	16.54	+	2.18	2.32e-05	0.00268
regulation of cell adhesion	737	32	14.71	+	2.18	8.17e-05	0.00734
regulation of system process	553	24	11.04	+	2.17	0.000591	0.034
embryo development	991	43	19.78	+	2.17	4.34e-06	0.000741
regulation of cell motility	950	41	18.96	+	2.16	8.79e-06	0.00134
positive regulation of cellular component movement	560	24	11.18	+	2.15	0.000663	0.0368
positive regulation of cell population proliferation	935	40	18.66	+	2.14	1.31e-05	0.00183
positive regulation of intracellular signal transduction	960	41	19.16	+	2.14	9.74e-06	0.0014
positive regulation of locomotion	562	24	11.22	+	2.14	0.000686	0.0373
positive regulation of developmental process	1267	54	25.28	+	2.14	2.85e-07	7.99e-05
regulation of MAPK cascade	658	28	13.13	+	2.13	0.000338	0.0221
regulation of locomotion	990	42	19.76	+	2.13	7.85e-06	0.00122
response to cytokine	807	34	16.1	+	2.11	6.38e-05	0.00619
positive regulation of cell differentiation	833	35	16.62	+	2.11	7.47e-05	0.00687
anatomical structure morphogenesis	2130	89	42.51	+	2.09	3.57e-11	7.01e-08
positive regulation of signal transduction	1460	61	29.14	+	2.09	7.59e-08	3.14e-05
generation of neurons	1237	51	24.69	+	2.07	1.9e-06	0.000373
negative regulation of cell population proliferation	704	29	14.05	+	2.06	0.000337	0.0221
regulation of cellular component movement	1025	42	20.46	+	2.05	1.89e-05	0.00238
regulation of cell differentiation	1496	61	29.85	+	2.04	1.8e-07	5.89e-05
positive regulation of cell communication	1632	66	32.57	+	2.03	7.06e-08	3.17e-05
neurogenesis	1361	55	27.16	+	2.02	1.2e-06	0.000246
positive regulation of signaling	1639	66	32.71	+	2.02	7.86e-08	3.09e-05
locomotion	1195	48	23.85	+	2.01	6.71e-06	0.00111
response to hormone	772	31	15.41	+	2.01	0.000357	0.0228
cellular response to cytokine stimulus	702	28	14.01	+	2	0.000881	0.045
regulation of developmental process	2368	94	47.26	+	1.99	1.66e-10	2.61e-07
localization of cell	986	39	19.68	+	1.98	7.02e-05	0.0066
cell motility	986	39	19.68	+	1.98	7.02e-05	0.00656
regulation of cell population proliferation	1650	63	32.93	+	1.91	1.03e-06	0.000219
nervous system development	2193	81	43.76	+	1.85	8.36e-08	3.13e-05
regulation of hydrolase activity	1033	38	20.61	+	1.84	0.000391	0.0246
regulation of multicellular organismal process	2578	94	51.45	+	1.83	9.08e-09	5.95e-06
positive regulation of multicellular organismal process	1412	51	28.18	+	1.81	7.46e-05	0.0069
movement of cell or subcellular component	1413	51	28.2	+	1.81	7.49e-05	0.00685
animal organ development	3079	111	61.45	+	1.81	5.91e-10	7.75e-07
system development	4169	150	83.2	+	1.8	5.65e-14	4.44e-10
negative regulation of signal transduction	1204	43	24.03	+	1.79	0.000298	0.0204
regulation of intracellular signal transduction	1655	59	33.03	+	1.79	2.29e-05	0.00267
chemical homeostasis	1113	39	22.21	+	1.76	0.000911	0.0462
response to endogenous stimulus	1342	47	26.78	+	1.75	0.000265	0.0186
cell surface receptor signaling pathway	2030	71	40.51	+	1.75	4.18e-06	0.000731
positive regulation of response to stimulus	2080	72	41.51	+	1.73	5.22e-06	0.000872
negative regulation of cell communication	1301	45	25.96	+	1.73	0.000476	0.0289
negative regulation of signaling	1305	45	26.04	+	1.73	0.000489	0.0293
multicellular organism development	4525	156	90.3	+	1.73	5.03e-13	1.97e-09
cell differentiation	3403	116	67.91	+	1.71	4.46e-09	3.69e-06
anatomical structure development	5001	170	99.8	+	1.7	5.99e-14	3.14e-10
response to oxygen-containing compound	1567	53	31.27	+	1.69	0.000238	0.0171
cellular developmental process	3463	117	69.11	+	1.69	5.86e-09	4.6e-06
regulation of signal transduction	2867	96	57.21	+	1.68	4.23e-07	0.000102
response to organic substance	2688	88	53.64	+	1.64	4.23e-06	0.00073
cell development	1623	53	32.39	+	1.64	0.000605	0.0346
regulation of cell communication	3242	105	64.7	+	1.62	5.4e-07	0.000129
developmental process	5565	180	111.06	+	1.62	6.72e-13	2.11e-09
cellular response to organic substance	1980	64	39.51	+	1.62	0.000145	0.0118
regulation of signaling	3257	105	65	+	1.62	5.72e-07	0.000132
cellular response to chemical stimulus	2567	80	51.23	+	1.56	6.34e-05	0.00619
regulation of response to stimulus	3805	118	75.93	+	1.55	7.1e-07	0.000159
regulation of molecular function	3060	94	61.07	+	1.54	1.92e-05	0.00238
multicellular organismal process	6584	199	131.39	+	1.51	8.34e-12	1.87e-08
regulation of localization	2709	81	54.06	+	1.5	0.000228	0.0167
response to chemical	4055	114	80.92	+	1.41	0.000101	0.00865
regulation of biological quality	3705	102	73.94	+	1.38	0.000591	0.0339
negative regulation of biological process	5187	141	103.51	+	1.36	4.54e-05	0.00463
signaling	5064	137	101.06	+	1.36	8.24e-05	0.00731
cell communication	5167	139	103.11	+	1.35	9.21e-05	0.00804
signal transduction	4727	127	94.33	+	1.35	0.00024	0.0172
negative regulation of cellular process	4785	128	95.49	+	1.34	0.000316	0.0212
positive regulation of cellular process	5580	145	111.36	+	1.3	0.000331	0.022
positive regulation of biological process	6062	155	120.98	+	1.28	0.000378	0.0239
cellular response to stimulus	6392	163	127.56	+	1.28	0.000249	0.0176
response to stimulus	8039	198	160.43	+	1.23	0.000231	0.0168
biological regulation	12249	286	244.44	+	1.17	2.97e-05	0.00329
regulation of biological process	11528	268	230.06	+	1.16	0.000196	0.0147
regulation of cellular process	11076	255	221.04	+	1.15	0.000952	0.0473
cellular process	15074	347	300.82	+	1.15	9.67e-08	3.53e-05
biological_process	17698	381	353.19	+	1.08	3.67e-05	0.00398
organic cyclic compound metabolic process	2922	35	58.31	-	0.6	0.000723	0.039
cellular nitrogen compound metabolic process	3193	34	63.72	-	0.53	2.24e-05	0.00262
Unclassified	2897	30	57.81	-	0.52	3.67e-05	0.00395
cellular aromatic compound metabolic process	2688	27	53.64	-	0.5	3.94e-05	0.00407
gene expression	1992	19	39.75	-	0.48	0.000248	0.0177
heterocycle metabolic process	2625	24	52.39	-	0.46	8.04e-06	0.00124
nucleobase-containing compound metabolic process	2474	20	49.37	-	0.41	1.42e-06	0.000286
RNA metabolic process	1403	8	28	-	0.29	1.42e-05	0.00191
nucleic acid metabolic process	2007	11	40.05	-	0.27	4.17e-08	1.93e-05
protein modification by small protein conjugation	710	3	14.17	-	0.21	0.000794	0.0416
RNA processing	847	3	16.9	-	0.18	6.9e-05	0.00653
cellular response to DNA damage stimulus	720	1	14.37	-	0.07	1.41e-05	0.00192
detection of chemical stimulus involved in sensory perception of smell	443	0	8.84	-	< 0.01	0.000334	0.022
detection of chemical stimulus involved in sensory perception	488	0	9.74	-	< 0.01	9.56e-05	0.00825
ribonucleoprotein complex biogenesis	424	0	8.46	-	< 0.01	0.000497	0.0295
sensory perception of smell	468	0	9.34	-	< 0.01	0.000142	0.0117
sensory perception of chemical stimulus	542	0	10.82	-	< 0.01	4.68e-05	0.00472
PANTHER GO Cellular Component	reference list	observed	expected	Fold Enrichment	+/-	raw P value	FDR
complex of collagen trimers	21	5	0.42	+	11.93	0.000131	0.029
collagen trimer	89	9	1.78	+	5.07	0.00013	0.0324
extracellular matrix	570	55	11.38	+	4.84	6.47e-21	1.28e-17
external encapsulating structure	571	55	11.4	+	4.83	6.97e-21	6.92e-18
collagen-containing extracellular matrix	426	37	8.5	+	4.35	4.53e-13	3e-10
endoplasmic reticulum lumen	313	18	6.25	+	2.88	0.000101	0.0288
extracellular space	3392	114	67.69	+	1.68	1.44e-08	4.78e-06
extracellular region	4373	144	87.27	+	1.65	1.89e-10	9.39e-08
cell periphery	6364	185	127	+	1.46	3.5e-09	1.39e-06
cellular anatomical entity	18715	394	373.48	+	1.05	0.00017	0.0339
PANTHER GO Molecular Function	reference list	observed	expected	Fold Enrichment	+/-	raw P value	FDR
collagen binding	70	9	1.4	+	6.44	2.36e-05	0.0231
extracellular matrix structural constituent	173	15	3.45	+	4.34	4.71e-06	0.0115
heparin binding	169	14	3.37	+	4.15	1.57e-05	0.0192
glycosaminoglycan binding	234	17	4.67	+	3.64	1e-05	0.0163
sulfur compound binding	267	17	5.33	+	3.19	4.87e-05	0.0396
calcium ion binding	730	32	14.57	+	2.2	4.96e-05	0.0346
RNA binding	1685	9	33.63	-	0.27	5.39e-07	0.00263
