# Supplementary material for: Understanding Cell Model Characteristics—RNA Expression Profiling in Primary and Immortalized Human Mesothelial Cells, and in Human Vein and Microvascular Endothelial Cells
Source: Cells. 2022 Oct 5;11(19):3133. doi: 10.3390/cells11193133 (PMC9563025; doi:10.3390/cells11193133)
Supplement: Supplementary file 1 [file cells-11-03133-s001.zip › Supplemental table S2_Genes specific for cell type in 1 vs 1 comparison.xlsx]

## Sheet: HPMC
HPMC specific GO enrichment analysis
PANTHER GO Biological process	reference list	observed	expected	Fold Enrichment	+/-	raw P value	FDR
detection of bacterial lipoprotein	5	4	0.18	+	21.74	0.000172	0.0235
neuron cell-cell adhesion	17	7	0.63	+	11.19	1.41e-05	0.00326
vocalization behavior	20	6	0.74	+	8.15	0.000246	0.0317
calcium-dependent cell-cell adhesion via plasma membrane cell adhesion molecules	42	10	1.55	+	6.47	1.23e-05	0.00292
homophilic cell adhesion via plasma membrane adhesion molecules	167	33	6.15	+	5.37	1.6e-13	4.2e-10
negative regulation of smooth muscle cell proliferation	54	9	1.99	+	4.53	0.000363	0.0449
cell-cell adhesion via plasma-membrane adhesion molecules	258	43	9.5	+	4.53	6.76e-15	2.66e-11
proteoglycan metabolic process	76	11	2.8	+	3.93	0.000252	0.0322
synapse assembly	99	14	3.64	+	3.84	4.75e-05	0.0089
positive regulation of interleukin-6 production	92	13	3.39	+	3.84	8.85e-05	0.014
cell-cell adhesion	515	65	18.95	+	3.43	2.03e-16	1.06e-12
aminoglycan metabolic process	123	14	4.53	+	3.09	0.000376	0.0462
cell adhesion	952	105	35.04	+	3	5.23e-22	8.21e-18
biological adhesion	958	105	35.26	+	2.98	8.05e-22	6.33e-18
regulation of smooth muscle cell proliferation	147	16	5.41	+	2.96	0.000235	0.0306
hormone metabolic process	199	21	7.32	+	2.87	4.04e-05	0.00803
positive regulation of epithelial cell proliferation	192	20	7.07	+	2.83	7.2e-05	0.0127
synapse organization	289	30	10.64	+	2.82	1.33e-06	0.000581
extracellular matrix organization	266	27	9.79	+	2.76	6.51e-06	0.00205
extracellular structure organization	267	27	9.83	+	2.75	6.93e-06	0.00214
external encapsulating structure organization	269	27	9.9	+	2.73	7.85e-06	0.00216
angiogenesis	310	30	11.41	+	2.63	4.87e-06	0.00163
blood circulation	399	37	14.69	+	2.52	1.13e-06	0.000506
vascular process in circulatory system	260	24	9.57	+	2.51	0.000116	0.0176
circulatory system process	490	45	18.03	+	2.5	9.14e-08	7.18e-05
positive regulation of nervous system development	271	24	9.97	+	2.41	0.000172	0.0237
negative regulation of cell adhesion	285	25	10.49	+	2.38	0.000139	0.0203
regulation of leukocyte cell-cell adhesion	327	28	12.04	+	2.33	0.000109	0.0167
blood vessel morphogenesis	404	34	14.87	+	2.29	2.04e-05	0.00422
cell junction organization	477	39	17.56	+	2.22	9.83e-06	0.00257
positive regulation of MAPK cascade	471	38	17.34	+	2.19	1.63e-05	0.0036
regulation of nervous system development	438	35	16.12	+	2.17	4.33e-05	0.00831
chemotaxis	504	40	18.55	+	2.16	1.62e-05	0.00363
positive regulation of cell adhesion	442	35	16.27	+	2.15	7.53e-05	0.013
taxis	507	40	18.66	+	2.14	1.75e-05	0.00378
regulation of cell-cell adhesion	441	34	16.23	+	2.09	0.000126	0.0186
modulation of chemical synaptic transmission	431	33	15.86	+	2.08	0.000178	0.0241
regulation of trans-synaptic signaling	432	33	15.9	+	2.08	0.000182	0.0245
blood vessel development	486	37	17.89	+	2.07	9.67e-05	0.0151
inflammatory response	502	38	18.48	+	2.06	7.55e-05	0.0126
skeletal system development	478	36	17.59	+	2.05	0.00014	0.0202
regulation of cell adhesion	737	55	27.13	+	2.03	2.96e-06	0.00108
neuron development	810	60	29.81	+	2.01	8.57e-07	0.000435
neuron projection development	651	48	23.96	+	2	1.5e-05	0.00342
vasculature development	509	37	18.73	+	1.98	0.000224	0.0296
regulation of system process	553	40	20.35	+	1.97	0.000107	0.0165
cellular component morphogenesis	569	41	20.94	+	1.96	0.000128	0.0188
actin filament-based process	599	43	22.05	+	1.95	7.65e-05	0.0127
circulatory system development	870	62	32.02	+	1.94	1.95e-06	0.000805
regulation of cell migration	894	63	32.9	+	1.91	2.51e-06	0.000963
regulation of MAPK cascade	658	46	24.22	+	1.9	6.99e-05	0.0125
positive regulation of cellular component movement	560	39	20.61	+	1.89	0.000287	0.0364
neuron differentiation	1008	70	37.1	+	1.89	1.1e-06	0.000507
cell migration	840	58	30.92	+	1.88	1.18e-05	0.00289
generation of neurons	1237	85	45.53	+	1.87	8.99e-08	7.44e-05
regulation of cytokine production	715	49	26.32	+	1.86	8.45e-05	0.0137
tube morphogenesis	644	44	23.7	+	1.86	0.000206	0.0274
regulation of cell motility	950	64	34.96	+	1.83	7.7e-06	0.00216
regulation of cellular component movement	1025	69	37.73	+	1.83	3.3e-06	0.00118
neurogenesis	1361	91	50.09	+	1.82	1.34e-07	0.0001
regulation of locomotion	990	66	36.44	+	1.81	7.69e-06	0.0022
locomotion	1195	79	43.98	+	1.8	1.49e-06	0.000631
cell-cell signaling	1030	68	37.91	+	1.79	7.61e-06	0.00221
tube development	845	55	31.1	+	1.77	9.51e-05	0.015
movement of cell or subcellular component	1413	90	52.01	+	1.73	1.02e-06	0.000487
localization of cell	986	62	36.29	+	1.71	7.55e-05	0.0129
cell motility	986	62	36.29	+	1.71	7.55e-05	0.0128
regulation of anatomical structure morphogenesis	908	57	33.42	+	1.71	0.000166	0.0231
animal organ morphogenesis	957	59	35.22	+	1.68	0.000235	0.0307
nervous system development	2193	134	80.71	+	1.66	1.33e-08	1.3e-05
regulation of multicellular organismal process	2578	156	94.88	+	1.64	1.19e-09	1.87e-06
regulation of multicellular organismal development	1294	78	47.63	+	1.64	4.09e-05	0.00804
positive regulation of multicellular organismal process	1412	84	51.97	+	1.62	3.21e-05	0.00646
system development	4169	246	153.44	+	1.6	1.05e-14	3.29e-11
anatomical structure morphogenesis	2130	125	78.39	+	1.59	3.7e-07	0.000216
defense response	1387	81	51.05	+	1.59	7.26e-05	0.0127
positive regulation of developmental process	1267	73	46.63	+	1.57	0.000312	0.0392
multicellular organism development	4525	257	166.54	+	1.54	1.65e-13	3.7e-10
animal organ development	3079	174	113.32	+	1.54	1.24e-08	1.3e-05
regulation of cell population proliferation	1650	93	60.73	+	1.53	8.19e-05	0.0134
cell development	1623	88	59.73	+	1.47	0.000385	0.0466
anatomical structure development	5001	269	184.06	+	1.46	1.29e-11	2.54e-08
regulation of developmental process	2368	125	87.15	+	1.43	6.63e-05	0.012
response to external stimulus	2406	125	88.55	+	1.41	0.00012	0.018
regulation of biological quality	3705	192	136.36	+	1.41	7.57e-07	0.000396
regulation of localization	2709	140	99.7	+	1.4	5.38e-05	0.00996
cell differentiation	3403	175	125.25	+	1.4	4.9e-06	0.0016
cellular developmental process	3463	177	127.46	+	1.39	7.09e-06	0.0021
developmental process	5565	281	204.82	+	1.37	3.36e-09	4.4e-06
multicellular organismal process	6584	319	242.32	+	1.32	1.11e-08	1.24e-05
signaling	5064	245	186.38	+	1.31	2.4e-06	0.000944
cell communication	5167	245	190.17	+	1.29	1.15e-05	0.00286
organic substance metabolic process	7404	225	272.5	-	0.83	0.000379	0.0462
metabolic process	7882	237	290.1	-	0.82	8.54e-05	0.0137
primary metabolic process	6869	197	252.81	-	0.78	1.78e-05	0.00378
nitrogen compound metabolic process	6360	178	234.08	-	0.76	9.83e-06	0.00253
macromolecule metabolic process	5743	157	211.37	-	0.74	9.29e-06	0.00247
cellular metabolic process	7029	191	258.7	-	0.74	1.88e-07	0.000114
cellular macromolecule metabolic process	4442	106	163.49	-	0.65	1.87e-07	0.000118
cellular protein metabolic process	3219	76	118.48	-	0.64	1.27e-05	0.00298
cellular aromatic compound metabolic process	2688	57	98.93	-	0.58	2.4e-06	0.000968
cellular nitrogen compound metabolic process	3193	61	117.52	-	0.52	1.92e-09	2.74e-06
gene expression	1992	38	73.32	-	0.52	4.97e-06	0.00159
heterocycle metabolic process	2625	48	96.61	-	0.5	1.85e-08	1.71e-05
nucleobase-containing compound metabolic process	2474	42	91.06	-	0.46	3.8e-09	4.59e-06
cellular nitrogen compound biosynthetic process	1289	21	47.44	-	0.44	2e-05	0.00419
RNA metabolic process	1403	22	51.64	-	0.43	3.73e-06	0.0013
cell cycle	1205	18	44.35	-	0.41	1.02e-05	0.00258
heterocycle biosynthetic process	809	12	29.78	-	0.4	0.000343	0.0427
cell cycle process	802	11	29.52	-	0.37	0.000149	0.0209
nucleic acid metabolic process	2007	25	73.87	-	0.34	3.21e-11	5.61e-08
cellular macromolecule catabolic process	818	10	30.11	-	0.33	4.69e-05	0.00888
chromatin organization	686	8	25.25	-	0.32	0.000144	0.0206
chromosome organization	1021	11	37.58	-	0.29	6.39e-07	0.000346
RNA processing	847	7	31.17	-	0.22	3.79e-07	0.000213
detection of chemical stimulus	524	4	19.29	-	0.21	6.5e-05	0.0119
mRNA metabolic process	564	4	20.76	-	0.19	1.63e-05	0.00356
DNA metabolic process	714	4	26.28	-	0.15	1.69e-07	0.000116
cellular response to DNA damage stimulus	720	4	26.5	-	0.15	1.78e-07	0.000116
detection of stimulus involved in sensory perception	558	3	20.54	-	0.15	4.22e-06	0.00144
ncRNA processing	388	2	14.28	-	0.14	0.000147	0.0209
sensory perception of smell	468	2	17.22	-	0.12	1.18e-05	0.00286
DNA repair	478	2	17.59	-	0.11	8.16e-06	0.00221
sensory perception of chemical stimulus	542	2	19.95	-	0.1	8.85e-07	0.000435
peptide biosynthetic process	388	1	14.28	-	0.07	2.09e-05	0.00426
ribonucleA63:A129oprotein complex biogenesis	424	1	15.61	-	0.06	6.95e-06	0.0021
PANTHER GO Cellular Component	reference list	observed	expected	Fold Enrichment	+/-	raw P value	FDR
MHC class II protein complex	18	6	0.66	+	9.06	0.000153	0.00607
MHC protein complex	26	6	0.96	+	6.27	0.000807	0.0254
excitatory synapse	50	8	1.84	+	4.35	0.000969	0.0288
collagen trimer	89	12	3.28	+	3.66	0.000243	0.00945
voltage-gated potassium channel complex	79	10	2.91	+	3.44	0.00121	0.0331
postsynaptic specialization membrane	121	15	4.45	+	3.37	0.0001	0.00433
potassium channel complex	89	11	3.28	+	3.36	0.000841	0.0261
intrinsic component of postsynaptic membrane	125	15	4.6	+	3.26	0.000139	0.00564
postsynaptic density membrane	93	11	3.42	+	3.21	0.00117	0.0322
integral component of postsynaptic membrane	119	14	4.38	+	3.2	0.000277	0.0102
sarcolemma	139	16	5.12	+	3.13	0.000131	0.00543
postsynaptic membrane	283	32	10.42	+	3.07	1.04e-07	1.08e-05
endocytic vesicle membrane	193	21	7.1	+	2.96	2.68e-05	0.00148
external encapsulating structure	571	62	21.02	+	2.95	4.92e-13	2.44e-10
extracellular matrix	570	61	20.98	+	2.91	1.35e-12	4.46e-10
synaptic membrane	391	40	14.39	+	2.78	3.38e-08	4.19e-06
intrinsic component of synaptic membrane	168	17	6.18	+	2.75	0.000334	0.0118
dendritic spine	183	18	6.74	+	2.67	0.00031	0.0112
integral component of synaptic membrane	154	15	5.67	+	2.65	0.00105	0.0306
neuron spine	185	18	6.81	+	2.64	0.00035	0.0122
postsynaptic density	335	30	12.33	+	2.43	2.11e-05	0.00127
collagen-containing extracellular matrix	426	38	15.68	+	2.42	2.51e-06	0.000191
asymmetric synapse	340	30	12.51	+	2.4	2.65e-05	0.00155
postsynapse	640	55	23.56	+	2.33	2.92e-08	3.87e-06
postsynaptic specialization	361	31	13.29	+	2.33	3.96e-05	0.00188
neuron to neuron synapse	366	30	13.47	+	2.23	9.61e-05	0.00424
integral component of plasma membrane	1653	131	60.84	+	2.15	7.87e-16	7.82e-13
intrinsic component of plasma membrane	1738	135	63.97	+	2.11	1.2e-15	7.97e-13
plasma membrane protein complex	696	49	25.62	+	1.91	4.38e-05	0.00202
neuronal cell body	515	36	18.95	+	1.9	0.000421	0.0139
synapse	1347	93	49.58	+	1.88	2.14e-08	3.04e-06
cell body	587	40	21.6	+	1.85	0.000389	0.0131
plasma membrane region	1258	83	46.3	+	1.79	8.22e-07	7.43e-05
cell surface	931	61	34.27	+	1.78	3.07e-05	0.00156
somatodendritic compartment	872	56	32.09	+	1.74	0.00012	0.00508
dendrite	645	41	23.74	+	1.73	0.00109	0.0313
dendritic tree	647	41	23.81	+	1.72	0.00151	0.039
cell junction	2103	133	77.4	+	1.72	2.31e-09	3.83e-07
neuron projection	1397	79	51.42	+	1.54	0.00025	0.00956
cell periphery	6364	358	234.23	+	1.53	3.43e-20	6.81e-17
extracellular region	4373	238	160.95	+	1.48	1.84e-10	3.32e-08
extracellular space	3392	178	124.84	+	1.43	1.1e-06	9.07e-05
plasma membrane	5867	306	215.94	+	1.42	7.34e-12	1.82e-09
intrinsic component of membrane	5947	310	218.88	+	1.42	5e-12	1.42e-09
integral component of membrane	5787	299	212.99	+	1.4	4.47e-11	8.89e-09
vesicle	3932	192	144.72	+	1.33	3.59e-05	0.00174
membrane	9904	423	364.52	+	1.16	3.31e-05	0.00164
cellular anatomical entity	18715	725	688.81	+	1.05	1.03e-06	8.93e-05
cellular_component	18866	728	694.36	+	1.05	2.94e-06	0.000217
intracellular organelle	13115	433	482.7	-	0.9	0.000262	0.00982
intracellular membrane-bounded organelle	12029	393	442.73	-	0.89	0.000364	0.0125
cytosol	5394	159	198.53	-	0.8	0.00116	0.0324
intracellular non-membrane-bounded organelle	5088	138	187.26	-	0.74	2.91e-05	0.00156
non-membrane-bounded organelle	5088	138	187.26	-	0.74	2.91e-05	0.00152
nucleus	7600	204	279.72	-	0.73	1.18e-08	1.81e-06
organelle lumen	5541	148	203.94	-	0.73	3.97e-06	0.000272
intracellular organelle lumen	5541	148	203.94	-	0.73	3.97e-06	0.000263
membrane-enclosed lumen	5541	148	203.94	-	0.73	3.97e-06	0.000255
protein-containing complex	5424	138	199.63	-	0.69	2.52e-07	2.39e-05
nuclear lumen	4419	103	162.64	-	0.63	6.34e-08	7.41e-06
nucleoplasm	4069	94	149.76	-	0.63	1.55e-07	1.54e-05
chromosome	1772	40	65.22	-	0.61	0.000867	0.0265
mitochondrion	1654	33	60.88	-	0.54	8.84e-05	0.00399
Unclassified	1729	30	63.64	-	0.47	2.94e-06	0.000209
mitochondrial envelope	792	13	29.15	-	0.45	0.00127	0.034
mitochondrial membrane	742	12	27.31	-	0.44	0.00175	0.0447
nucleolus	964	13	35.48	-	0.37	2.65e-05	0.00151
centrosome	622	8	22.89	-	0.35	0.00063	0.0202
organelle inner membrane	556	7	20.46	-	0.34	0.00112	0.0317
intracellular protein-containing complex	742	7	27.31	-	0.26	7.5e-06	0.000466
transcription regulator complex	425	4	15.64	-	0.26	0.00132	0.0349
catalytic complex	1358	11	49.98	-	0.22	3.91e-11	8.62e-09
transferase complex	760	6	27.97	-	0.21	1.22e-06	9.67e-05
chromosomal region	336	2	12.37	-	0.16	0.00089	0.0268
ribonucleoprotein complex	678	3	24.95	-	0.12	7.69e-08	8.49e-06
nuclear protein-containing complex	1147	5	42.22	-	0.12	9.53e-13	3.79e-10
spliceosomal complex	193	0	7.1	-	< 0.01	0.00145	0.0379
ribosome	230	0	8.47	-	< 0.01	0.000453	0.0147
PANTHER GO Molecular Function	reference list	observed	expected	Fold Enrichment	+/-	raw P value	FDR
steroid dehydrogenase activity, acting on the CH-OH group of donors, NAD or NADP as acceptor	31	8	1.14	+	7.01	5.63e-05	0.0153
steroid dehydrogenase activity	35	8	1.29	+	6.21	0.000117	0.0272
amyloid-beta binding	83	16	3.05	+	5.24	3.93e-07	0.00024
scavenger receptor activity	47	9	1.73	+	5.2	0.000145	0.0307
cargo receptor activity	78	12	2.87	+	4.18	7.95e-05	0.0194
integrin binding	147	19	5.41	+	3.51	7.3e-06	0.00274
voltage-gated cation channel activity	143	18	5.26	+	3.42	1.74e-05	0.00608
heparin binding	169	21	6.22	+	3.38	4.28e-06	0.00174
glycosaminoglycan binding	234	29	8.61	+	3.37	7.08e-08	6.91e-05
extracellular matrix structural constituent	173	20	6.37	+	3.14	1.88e-05	0.00573
cytokine binding	139	16	5.12	+	3.13	0.000131	0.0291
receptor ligand activity	491	38	18.07	+	2.1	4.01e-05	0.0115
signaling receptor activator activity	499	38	18.37	+	2.07	7.17e-05	0.0184
calcium ion binding	730	52	26.87	+	1.94	1.75e-05	0.00571
signaling receptor binding	1588	101	58.45	+	1.73	2.15e-07	0.00015
binding	16519	659	607.98	+	1.08	1.85e-06	0.000821
molecular_function	18250	712	671.69	+	1.06	1.32e-06	0.000717
organic cyclic compound binding	6025	153	221.75	-	0.69	2.63e-08	3.21e-05
heterocyclic compound binding	5945	149	218.81	-	0.68	1.41e-08	2.3e-05
Unclassified	2345	46	86.31	-	0.53	1.32e-06	0.000646
nucleic acid binding	3989	77	146.82	-	0.52	1.23e-11	3e-08
RNA binding	1685	17	62.02	-	0.27	1.13e-11	5.51e-08
olfactory receptor activity	441	0	16.23	-	< 0.01	1.64e-07	0.000133

## Sheet: MeT5A
MeT-5A specific GO enrichment analysis
PANTHER GO Biological process	reference list	observed	expected	Fold Enrichment	+/-	raw P value	FDR
macromolecule catabolic process	909	14	40.25	-	0.35	3.47e-06	0.0273
cellular macromolecule catabolic process	818	12	36.22	-	0.33	5.95e-06	0.0234
detection of chemical stimulus	524	5	23.2	-	0.22	1.47e-05	0.0386
detection of chemical stimulus involved in sensory perception	488	4	21.61	-	0.19	1.17e-05	0.0369
sensory perception of smell	468	3	20.72	-	0.14	4.15e-06	0.0217
detection of chemical stimulus involved in sensory perception of smell	443	2	19.62	-	0.1	1.24e-06	0.0195
PANTHER GO Cellular Component	reference list	observed	expected	Fold Enrichment	+/-	raw P value	FDR
cytosol	5394	178	238.86	-	0.75	4.15e-06	0.00275
protein-containing complex	5424	173	240.19	-	0.72	3.38e-07	0.000672
catalytic complex	1358	30	60.14	-	0.5	2.37e-05	0.0118
ribonucleoprotein complex	678	7	30.02	-	0.23	1.03e-06	0.00102
PANTHER GO Molecular Function	reference list	observed	expected	Fold Enrichment	+/-	raw P value	FDR
DNA-binding transcription factor activity, RNA polymerase II-specific	1390	121	61.55	+	1.97	7.93e-12	3.87e-08
DNA-binding transcription activator activity	460	40	20.37	+	1.96	0.000116	0.0355
DNA-binding transcription factor activity	1443	123	63.9	+	1.92	2.62e-11	6.4e-08
RNA polymerase II transcription regulatory region sequence-specific DNA binding	1430	121	63.32	+	1.91	5.34e-11	8.68e-08
transcription cis-regulatory region binding	1526	121	67.58	+	1.79	2.26e-09	2.75e-06
transcription regulatory region nucleic acid binding	1528	121	67.66	+	1.79	2.33e-09	2.27e-06
RNA polymerase II cis-regulatory region sequence-specific DNA binding	1203	95	53.27	+	1.78	1.68e-07	7.44e-05
cis-regulatory region sequence-specific DNA binding	1223	96	54.16	+	1.77	2.03e-07	8.25e-05
sequence-specific double-stranded DNA binding	1582	124	70.06	+	1.77	2.78e-09	2.26e-06
double-stranded DNA binding	1679	128	74.35	+	1.72	7.28e-09	5.07e-06
sequence-specific DNA binding	1687	127	74.7	+	1.7	1.62e-08	8.79e-06
transcription regulator activity	1942	131	86	+	1.52	3.07e-06	0.00107
DNA binding	2494	167	110.44	+	1.51	1.38e-07	6.75e-05
binding	16519	782	731.5	+	1.07	2.32e-05	0.00754
RNA binding	1685	31	74.62	-	0.42	1.01e-08	6.17e-06
olfactory receptor activity	441	2	19.53	-	0.1	1.89e-06	0.00071
