# Supplementary material for: Understanding Cell Model Characteristics—RNA Expression Profiling in Primary and Immortalized Human Mesothelial Cells, and in Human Vein and Microvascular Endothelial Cells
Source: Cells. 2022 Oct 5;11(19):3133. doi: 10.3390/cells11193133 (PMC9563025; doi:10.3390/cells11193133)
Supplement: Supplementary file 1 [file cells-11-03133-s001.zip › Supplemental table S3_Genes specific for 393 mesothelial genes.xlsx]

## Sheet: Tabelle1
ID	Term	Ontology Source	Term PValue	Term PValue Corrected with Benjamini-Hochberg	Group PValue	Group PValue Corrected with Benjamini-Hochberg	GOLevels	GOGroups	% Associated Genes	Nr. Genes	Associated Genes Found
GO:0060840	artery development	GO_BiologicalProcess-EBI-UniProt-GOA-ACAP-ARAP_19.11.2021_00h00	0.00104437	0.047345	0.00104437	0.00104437	[4, 6, 7, 8]	Group0	33.3333	3	[FOXF1, HOXA1, STRA6]
GO:0048844	artery morphogenesis	GO_BiologicalProcess-EBI-UniProt-GOA-ACAP-ARAP_19.11.2021_00h00	0.000706122	0.0480163	0.00104437	0.00104437	[5, 6, 7, 8, 9]	Group0	37.5	3	[FOXF1, HOXA1, STRA6]
GO:0015629	actin cytoskeleton	GO_CellularComponent-EBI-UniProt-GOA-ACAP-ARAP_19.11.2021_00h00	0.00811431	0.035703	0.00811431	0.0108191	[6]	Group0	4.65116	12	[BAIAP2L1, CARMIL2, CDH1, DENND2A, EFR3B, FMN2, MYH14, NEURL1B, SCNN1D, SPTBN4, SYNPO2, TNNT1]
GO:0043296	apical junction complex	GO_CellularComponent-EBI-UniProt-GOA-ACAP-ARAP_19.11.2021_00h00	0.00917727	0.03365	0.00917727	0.00917727	[5]	Group1	8.77193	5	[CDH1, CGN, CLDN1, EPPK1, SH3BP1]
GO:0009925	basal plasma membrane	GO_CellularComponent-EBI-UniProt-GOA-ACAP-ARAP_19.11.2021_00h00	0.00403904	0.0444295	0.00403904	0.0161562	[3, 4, 5]	Group2	6.72269	8	[ALPK2, BEST1, CLDN1, ERBB3, PDPN, SLC13A3, SLC46A1, SLC4A4]
GO:0016323	basolateral plasma membrane	GO_CellularComponent-EBI-UniProt-GOA-ACAP-ARAP_19.11.2021_00h00	0.0016927	0.0372394	0.00403904	0.0161562	[4, 5, 6]	Group2	7.69231	8	[ALPK2, BEST1, CLDN1, ERBB3, PDPN, SLC13A3, SLC46A1, SLC4A4]
GO:0030312	external encapsulating structure	GO_CellularComponent-EBI-UniProt-GOA-ACAP-ARAP_19.11.2021_00h00	0.00512596	0.0375904	0.00512596	0.0102519	[2, 3]	Group3	7.2165	7	[APOE, FGFR2, LUM, MFAP4, TGFB3, TNC, VTN]
GO:0031012	extracellular matrix	GO_CellularComponent-EBI-UniProt-GOA-ACAP-ARAP_19.11.2021_00h00	0.00512596	0.0375904	0.00512596	0.0102519	[3, 4]	Group3	7.2165	7	[APOE, FGFR2, LUM, MFAP4, TGFB3, TNC, VTN]
GO:0062023	collagen-containing extracellular matrix	GO_CellularComponent-EBI-UniProt-GOA-ACAP-ARAP_19.11.2021_00h00	0.00617464	0.0339605	0.00512596	0.0102519	[4, 5]	Group3	8	6	[FGFR2, LUM, MFAP4, TGFB3, TNC, VTN]
GO:0017147	Wnt-protein binding	GO_MolecularFunction-EBI-UniProt-GOA-ACAP-ARAP_19.11.2021_00h00	0.000612007	0.0275403	0.000612007	0.000612007	[3]	Group0	23.5294	4	[FZD3, FZD7, ROR2, TRABD2B]
R-HSA:9662360	Sensory processing of sound by inner hair cells of the cochlea	REACTOME_Pathways_23.11.2021	0.00553608	0.0399828	0.00553608	0.00645876	[-1]	Group0	8.69565	6	[CACNB2, ESPNL, PCLO, RIPOR2, SNAP25, SYN1]
R-HSA:9709957	Sensory Perception	REACTOME_Pathways_23.11.2021	0.00158482	0.0343377	0.00158482	0.0110937	[-1]	Group1	5.22648	15	[APOE, CACNB2, ESPNL, GPC3, GPC4, GPC6, HSD17B6, PCLO, RGS9, RIPOR2, SCNN1A, SCNN1D, SNAP25, STRA6, SYN1]
R-HSA:212676	Dopamine Neurotransmitter Release Cycle	REACTOME_Pathways_23.11.2021	0.0022009	0.0357646	0.0022009	0.00770314	[-1]	Group2	17.3913	4	[LIN7B, PPFIA4, SNAP25, SYN1]
R-HSA:3781865	Diseases of glycosylation	REACTOME_Pathways_23.11.2021	0.00521817	0.0423977	0.00521817	0.00730544	[-1]	Group3	6.29371	9	[ADAMTS3, ADAMTS5, GALNT12, GPC3, GPC4, GPC6, LUM, MUC1, SBSPON]
R-HSA:419408	Lysosphingolipid and LPA receptors	REACTOME_Pathways_23.11.2021	0.00516451	0.0479562	0.00516451	0.00903789	[-1]	Group4	21.4286	3	[LPAR2, PLPPR3, S1PR5]
R-HSA:2022928	HS-GAG biosynthesis	REACTOME_Pathways_23.11.2021	0.00688508	0.044753	0.00688508	0.00688508	[-1]	Group5	12.9032	4	[GPC3, GPC4, GPC6, HS3ST3B1]
R-HSA:3656237	Defective EXT2 causes exostoses 2	REACTOME_Pathways_23.11.2021	0.00516451	0.0479562	0.00688508	0.00688508	[-1]	Group5	21.4286	3	[GPC3, GPC4, GPC6]
R-HSA:3656253	Defective EXT1 causes exostoses 1, TRPS2 and CHDS	REACTOME_Pathways_23.11.2021	0.00516451	0.0479562	0.00688508	0.00688508	[-1]	Group5	21.4286	3	[GPC3, GPC4, GPC6]
R-HSA:166658	Complement cascade	REACTOME_Pathways_23.11.2021	0.00224972	0.0292464	0.00224972	0.00524935	[-1]	Group6	10.3448	6	[C3, C4B, CFB, CFD, SERPING1, VTN]
R-HSA:166663	Initial triggering of complement	REACTOME_Pathways_23.11.2021	0.0022009	0.0357646	0.00224972	0.00524935	[-1]	Group6	17.3913	4	[C3, C4B, CFB, CFD]
R-HSA:173736	Alternative complement activation	REACTOME_Pathways_23.11.2021	0.000162566	0.0105668	0.00224972	0.00524935	[-1]	Group6	60	3	[C3, CFB, CFD]
R-HSA:174577	Activation of C3 and C5	REACTOME_Pathways_23.11.2021	0.000869881	0.0282711	0.00224972	0.00524935	[-1]	Group6	37.5	3	[C3, C4B, CFB]
