# Supplementary material for: Understanding Cell Model Characteristics—RNA Expression Profiling in Primary and Immortalized Human Mesothelial Cells, and in Human Vein and Microvascular Endothelial Cells
Source: Cells. 2022 Oct 5;11(19):3133. doi: 10.3390/cells11193133 (PMC9563025; doi:10.3390/cells11193133)
Supplement: Supplementary file 1 [file cells-11-03133-s001.zip › Supplemental table S4_Genes specific for 235 endothelial genes.xlsx]

## Sheet: Tabelle1
ID	Term	Ontology Source	Term PValue	Term PValue Corrected with Benjamini-Hochberg	Group PValue	Group PValue Corrected with Benjamini-Hochberg	GOLevels	GOGroups	% Associated Genes	Nr. Genes	Associated Genes Found
GO:0002573	myeloid leukocyte differentiation	GO_BiologicalProcess-EBI-UniProt-GOA-ACAP-ARAP_19.11.2021_00h00	0.032782	0.0375901	0.032782	0.0368798	[5, 6, 7, 8, 9]	Group00	4.65116	4	[HCLS1, LGALS9, TAL1, TNFRSF11A]
GO:0008217	regulation of blood pressure	GO_BiologicalProcess-EBI-UniProt-GOA-ACAP-ARAP_19.11.2021_00h00	0.01431	0.0223756	0.01431	0.0234164	[3, 5]	Group01	8.57143	3	[CD34, EDN1, NOS3]
GO:1901224	positive regulation of NIK/NF-kappaB signaling	GO_BiologicalProcess-EBI-UniProt-GOA-ACAP-ARAP_19.11.2021_00h00	0.0285894	0.0341485	0.0285894	0.0343073	[5, 6, 7, 8]	Group02	6.66667	3	[LGALS9, NR3C2, TCIM]
GO:0022839	ion gated channel activity	GO_BiologicalProcess-EBI-UniProt-GOA-ACAP-ARAP_19.11.2021_00h00	0.00839254	0.0141521	0.00839254	0.0167851	[7, 9]	Group03	10.3448	3	[ANO2, KCNMB4, KCNN3]
GO:0035051	cardiocyte differentiation	GO_BiologicalProcess-EBI-UniProt-GOA-ACAP-ARAP_19.11.2021_00h00	0.0131911	0.0214045	0.0131911	0.0237441	[4, 5, 6, 7]	Group04	8.82353	3	[EDN1, NRG1, SOX17]
GO:0038024	cargo receptor activity	GO_BiologicalProcess-EBI-UniProt-GOA-ACAP-ARAP_19.11.2021_00h00	0.0193376	0.0259849	0.0193376	0.0248627	[4, 6]	Group05	7.69231	3	[CD36, CUBN, SCARF1]
GO:0032613	interleukin-10 production	GO_BiologicalProcess-EBI-UniProt-GOA-ACAP-ARAP_19.11.2021_00h00	0.0179968	0.0249633	0.0179968	0.0249186	[3, 6]	Group06	7.89474	3	[CD34, DLL1, LGALS9]
GO:0032653	regulation of interleukin-10 production	GO_BiologicalProcess-EBI-UniProt-GOA-ACAP-ARAP_19.11.2021_00h00	0.0179968	0.0249633	0.0179968	0.0249186	[4, 5, 6, 7]	Group06	7.89474	3	[CD34, DLL1, LGALS9]
GO:0048588	developmental cell growth	GO_BiologicalProcess-EBI-UniProt-GOA-ACAP-ARAP_19.11.2021_00h00	0.0303357	0.0352551	0.0584578	0.0618965	[3, 4, 5]	Group07	6.52174	3	[CPNE5, EDN1, SYT1]
GO:0048639	positive regulation of developmental growth	GO_BiologicalProcess-EBI-UniProt-GOA-ACAP-ARAP_19.11.2021_00h00	0.0207353	0.0274343	0.0584578	0.0618965	[3, 4, 5]	Group07	7.5	3	[CPNE5, EDN1, SYT1]
GO:0050900	leukocyte migration	GO_BiologicalProcess-EBI-UniProt-GOA-ACAP-ARAP_19.11.2021_00h00	0.000880748	0.00270515	0.000880748	0.00396337	[2, 4, 5]	Group08	4.5	9	[EDN1, FLT1, KIT, LGALS9, LYVE1, PECAM1, PLVAP, SELP, TNFSF18]
GO:0045123	cellular extravasation	GO_BiologicalProcess-EBI-UniProt-GOA-ACAP-ARAP_19.11.2021_00h00	0.00209997	0.00515993	0.000880748	0.00396337	[3, 5, 6]	Group08	10	4	[LYVE1, PECAM1, PLVAP, SELP]
GO:0002687	positive regulation of leukocyte migration	GO_BiologicalProcess-EBI-UniProt-GOA-ACAP-ARAP_19.11.2021_00h00	0.0291077	0.0342913	0.000880748	0.00396337	[3, 4, 5, 6, 7, 8]	Group08	4.81928	4	[LGALS9, LYVE1, PLVAP, TNFSF18]
GO:0071772	response to BMP	GO_BiologicalProcess-EBI-UniProt-GOA-ACAP-ARAP_19.11.2021_00h00	0.0170647	0.0244595	0.0170647	0.0255971	[3, 5]	Group09	5.6338	4	[BMPR1B, CDH5, GDF6, TMEM100]
GO:0071773	cellular response to BMP stimulus	GO_BiologicalProcess-EBI-UniProt-GOA-ACAP-ARAP_19.11.2021_00h00	0.0170647	0.0244595	0.0170647	0.0255971	[4, 6]	Group09	5.6338	4	[BMPR1B, CDH5, GDF6, TMEM100]
GO:0030509	BMP signaling pathway	GO_BiologicalProcess-EBI-UniProt-GOA-ACAP-ARAP_19.11.2021_00h00	0.014678	0.0225412	0.0170647	0.0255971	[5, 6, 7, 8]	Group09	5.88235	4	[BMPR1B, CDH5, GDF6, TMEM100]
GO:0010737	protein kinase A signaling	GO_BiologicalProcess-EBI-UniProt-GOA-ACAP-ARAP_19.11.2021_00h00	0.00427371	0.00816753	0.00278606	0.00716414	[4, 5, 6]	Group10	13.0435	3	[ADRB2, EDN1, TCIM]
GO:0043406	positive regulation of MAP kinase activity	GO_BiologicalProcess-EBI-UniProt-GOA-ACAP-ARAP_19.11.2021_00h00	0.0179134	0.025255	0.00278606	0.00716414	[6, 7, 8, 9, 10, 11, 12]	Group10	5.55556	4	[EDN1, FLT1, PIK3CG, TNFRSF11A]
GO:0071902	positive regulation of protein serine/threonine kinase activity	GO_BiologicalProcess-EBI-UniProt-GOA-ACAP-ARAP_19.11.2021_00h00	0.00129273	0.00326984	0.00278606	0.00716414	[8, 9, 10, 11]	Group10	5.42636	7	[ADRB2, EDN1, FLT1, PIK3CG, RGCC, TCIM, TNFRSF11A]
GO:0048017	inositol lipid-mediated signaling	GO_BiologicalProcess-EBI-UniProt-GOA-ACAP-ARAP_19.11.2021_00h00	0.00739281	0.0129751	0.00105402	0.00379447	[4, 5, 6]	Group11	5.49451	5	[EDN1, FLT1, HCLS1, PIK3CG, SELP]
GO:0048015	phosphatidylinositol-mediated signaling	GO_BiologicalProcess-EBI-UniProt-GOA-ACAP-ARAP_19.11.2021_00h00	0.00704935	0.0126301	0.00105402	0.00379447	[5, 6, 7]	Group11	5.55556	5	[EDN1, FLT1, HCLS1, PIK3CG, SELP]
GO:0014065	phosphatidylinositol 3-kinase signaling	GO_BiologicalProcess-EBI-UniProt-GOA-ACAP-ARAP_19.11.2021_00h00	0.00335912	0.00704595	0.00105402	0.00379447	[6, 7, 8]	Group11	6.57895	5	[EDN1, FLT1, HCLS1, PIK3CG, SELP]
GO:0014068	positive regulation of phosphatidylinositol 3-kinase signaling	GO_BiologicalProcess-EBI-UniProt-GOA-ACAP-ARAP_19.11.2021_00h00	0.026902	0.0325855	0.00105402	0.00379447	[5, 6, 7, 8, 9, 10]	Group11	6.81818	3	[FLT1, HCLS1, SELP]
GO:0043406	positive regulation of MAP kinase activity	GO_BiologicalProcess-EBI-UniProt-GOA-ACAP-ARAP_19.11.2021_00h00	0.0179134	0.025255	0.00105402	0.00379447	[6, 7, 8, 9, 10, 11, 12]	Group11	5.55556	4	[EDN1, FLT1, PIK3CG, TNFRSF11A]
GO:0071902	positive regulation of protein serine/threonine kinase activity	GO_BiologicalProcess-EBI-UniProt-GOA-ACAP-ARAP_19.11.2021_00h00	0.00129273	0.00326984	0.00105402	0.00379447	[8, 9, 10, 11]	Group11	5.42636	7	[ADRB2, EDN1, FLT1, PIK3CG, RGCC, TCIM, TNFRSF11A]
GO:0001655	urogenital system development	GO_BiologicalProcess-EBI-UniProt-GOA-ACAP-ARAP_19.11.2021_00h00	0.00495806	0.00926941	0.00495806	0.0111556	[4, 5]	Group12	6.0241	5	[CD34, GDF6, KLHL3, PECAM1, SOX17]
GO:0072001	renal system development	GO_BiologicalProcess-EBI-UniProt-GOA-ACAP-ARAP_19.11.2021_00h00	0.00421701	0.00824234	0.00495806	0.0111556	[4, 5, 6]	Group12	6.25	5	[CD34, GDF6, KLHL3, PECAM1, SOX17]
GO:0001822	kidney development	GO_BiologicalProcess-EBI-UniProt-GOA-ACAP-ARAP_19.11.2021_00h00	0.0031664	0.00698231	0.00495806	0.0111556	[4, 5, 6, 7]	Group12	6.66667	5	[CD34, GDF6, KLHL3, PECAM1, SOX17]
GO:0072006	nephron development	GO_BiologicalProcess-EBI-UniProt-GOA-ACAP-ARAP_19.11.2021_00h00	0.0207353	0.0274343	0.00495806	0.0111556	[3, 5, 6, 7, 8]	Group12	7.5	3	[CD34, KLHL3, PECAM1]
GO:0001656	metanephros development	GO_BiologicalProcess-EBI-UniProt-GOA-ACAP-ARAP_19.11.2021_00h00	0.00326292	0.00701528	0.00495806	0.0111556	[5, 6, 7, 8]	Group12	14.2857	3	[CD34, GDF6, SOX17]
GO:0072073	kidney epithelium development	GO_BiologicalProcess-EBI-UniProt-GOA-ACAP-ARAP_19.11.2021_00h00	0.00839254	0.0141521	0.00495806	0.0111556	[5, 6, 7, 8]	Group12	10.3448	3	[CD34, KLHL3, PECAM1]
GO:0072009	nephron epithelium development	GO_BiologicalProcess-EBI-UniProt-GOA-ACAP-ARAP_19.11.2021_00h00	0.00612098	0.0112001	0.00495806	0.0111556	[4, 6, 7, 8, 9]	Group12	11.5385	3	[CD34, KLHL3, PECAM1]
GO:1901342	regulation of vasculature development	GO_BiologicalProcess-EBI-UniProt-GOA-ACAP-ARAP_19.11.2021_00h00	0.000536816	0.00184665	0.00148495	0.00445486	[4, 5, 6, 7]	Group13	4.81283	9	[CD34, CDH5, CLDN5, ECSCR, FLT1, NOS3, NRG1, RGCC, RHOJ]
GO:1901343	negative regulation of vasculature development	GO_BiologicalProcess-EBI-UniProt-GOA-ACAP-ARAP_19.11.2021_00h00	0.0170647	0.0244595	0.00148495	0.00445486	[3, 4, 5, 6, 7, 8]	Group13	5.6338	4	[CLDN5, ECSCR, NRG1, RGCC]
GO:0072577	endothelial cell apoptotic process	GO_BiologicalProcess-EBI-UniProt-GOA-ACAP-ARAP_19.11.2021_00h00	0.0285894	0.0341485	0.00148495	0.00445486	[6]	Group13	6.66667	3	[CDH5, ECSCR, RGCC]
GO:2000181	negative regulation of blood vessel morphogenesis	GO_BiologicalProcess-EBI-UniProt-GOA-ACAP-ARAP_19.11.2021_00h00	0.0162428	0.0240842	0.00148495	0.00445486	[4, 5, 6, 7, 8, 9]	Group13	5.71429	4	[CLDN5, ECSCR, NRG1, RGCC]
GO:0045765	regulation of angiogenesis	GO_BiologicalProcess-EBI-UniProt-GOA-ACAP-ARAP_19.11.2021_00h00	0.000495521	0.00185282	0.00148495	0.00445486	[4, 5, 6, 7, 8, 9, 10]	Group13	4.86486	9	[CD34, CDH5, CLDN5, ECSCR, FLT1, NOS3, NRG1, RGCC, RHOJ]
GO:0016525	negative regulation of angiogenesis	GO_BiologicalProcess-EBI-UniProt-GOA-ACAP-ARAP_19.11.2021_00h00	0.0154474	0.0233066	0.00148495	0.00445486	[4, 5, 6, 7, 8, 9, 10, 11]	Group13	5.7971	4	[CLDN5, ECSCR, NRG1, RGCC]
GO:2000351	regulation of endothelial cell apoptotic process	GO_BiologicalProcess-EBI-UniProt-GOA-ACAP-ARAP_19.11.2021_00h00	0.0237027	0.0304243	0.00148495	0.00445486	[7, 8]	Group13	7.14286	3	[CDH5, ECSCR, RGCC]
GO:0033627	cell adhesion mediated by integrin	GO_BiologicalProcess-EBI-UniProt-GOA-ACAP-ARAP_19.11.2021_00h00	0.0303357	0.0352551	0.0594166	0.0594166	[3]	Group14	6.52174	3	[FERMT3, MMRN1, NRG1]
GO:0050878	regulation of body fluid levels	GO_BiologicalProcess-EBI-UniProt-GOA-ACAP-ARAP_19.11.2021_00h00	0.0241928	0.0305967	0.0594166	0.0594166	[3]	Group14	4.13223	5	[ADAMTS18, CD34, MMRN1, NRG1, VWF]
GO:0050818	regulation of coagulation	GO_BiologicalProcess-EBI-UniProt-GOA-ACAP-ARAP_19.11.2021_00h00	0.0221901	0.0289144	0.0594166	0.0594166	[3, 4]	Group14	7.31707	3	[ADAMTS18, CD34, NRG1]
GO:1900046	regulation of hemostasis	GO_BiologicalProcess-EBI-UniProt-GOA-ACAP-ARAP_19.11.2021_00h00	0.0167122	0.0243602	0.0594166	0.0594166	[2, 3, 4, 5]	Group14	8.10811	3	[ADAMTS18, CD34, NRG1]
GO:0007596	blood coagulation	GO_BiologicalProcess-EBI-UniProt-GOA-ACAP-ARAP_19.11.2021_00h00	0.00377021	0.00771996	0.0594166	0.0594166	[3, 5]	Group14	6.41026	5	[ADAMTS18, CD34, MMRN1, NRG1, VWF]
GO:0007599	hemostasis	GO_BiologicalProcess-EBI-UniProt-GOA-ACAP-ARAP_19.11.2021_00h00	0.00377021	0.00771996	0.0594166	0.0594166	[4]	Group14	6.41026	5	[ADAMTS18, CD34, MMRN1, NRG1, VWF]
GO:0030168	platelet activation	GO_BiologicalProcess-EBI-UniProt-GOA-ACAP-ARAP_19.11.2021_00h00	0.00385622	0.00771245	0.0594166	0.0594166	[3, 4, 6]	Group14	8.51064	4	[ADAMTS18, MMRN1, NRG1, VWF]
GO:1903034	regulation of response to wounding	GO_BiologicalProcess-EBI-UniProt-GOA-ACAP-ARAP_19.11.2021_00h00	0.0291077	0.0342913	0.0594166	0.0594166	[4, 5]	Group14	4.81928	4	[ADAMTS18, CD34, MMRN1, NRG1]
GO:1903035	negative regulation of response to wounding	GO_BiologicalProcess-EBI-UniProt-GOA-ACAP-ARAP_19.11.2021_00h00	0.026902	0.0325855	0.0594166	0.0594166	[3, 4, 5, 6]	Group14	6.81818	3	[ADAMTS18, CD34, MMRN1]
GO:0030193	regulation of blood coagulation	GO_BiologicalProcess-EBI-UniProt-GOA-ACAP-ARAP_19.11.2021_00h00	0.0167122	0.0243602	0.0594166	0.0594166	[3, 4, 5, 6, 7]	Group14	8.10811	3	[ADAMTS18, CD34, NRG1]
GO:0061041	regulation of wound healing	GO_BiologicalProcess-EBI-UniProt-GOA-ACAP-ARAP_19.11.2021_00h00	0.0257061	0.0320395	0.0594166	0.0594166	[5, 6]	Group14	5	4	[ADAMTS18, CD34, MMRN1, NRG1]
GO:0061045	negative regulation of wound healing	GO_BiologicalProcess-EBI-UniProt-GOA-ACAP-ARAP_19.11.2021_00h00	0.0237027	0.0304243	0.0594166	0.0594166	[4, 5, 6, 7]	Group14	7.14286	3	[ADAMTS18, CD34, MMRN1]
GO:0048646	anatomical structure formation involved in morphogenesis	GO_BiologicalProcess-EBI-UniProt-GOA-ACAP-ARAP_19.11.2021_00h00	4.49971e-07	5.52822e-06	1.46468e-06	2.63642e-05	[2, 3, 4]	Group15	4.52381	19	[CALCRL, CD34, CDH5, CLDN5, DLL4, ECSCR, EDN1, ESM1, FLT1, GJA5, HEY1, MMRN2, NOS3, NRG1, RGCC, RHOJ, ROBO4, SOX17, SOX7]
GO:0035295	tube development	GO_BiologicalProcess-EBI-UniProt-GOA-ACAP-ARAP_19.11.2021_00h00	1.39778e-06	1.50262e-05	1.46468e-06	2.63642e-05	[3, 4]	Group15	4.65753	17	[CALCRL, CD34, CDH5, CLDN5, DLL4, ECSCR, ESM1, FLT1, GJA5, HEY1, KLHL3, MMRN2, NOS3, NRG1, RGCC, RHOJ, ROBO4]
GO:0035239	tube morphogenesis	GO_BiologicalProcess-EBI-UniProt-GOA-ACAP-ARAP_19.11.2021_00h00	3.99156e-07	6.86548e-06	1.46468e-06	2.63642e-05	[3, 4, 5]	Group15	5.08982	17	[CALCRL, CD34, CDH5, CLDN5, DLL4, ECSCR, ESM1, FLT1, GJA5, HEY1, KLHL3, MMRN2, NOS3, NRG1, RGCC, RHOJ, ROBO4]
GO:0072359	circulatory system development	GO_BiologicalProcess-EBI-UniProt-GOA-ACAP-ARAP_19.11.2021_00h00	1.77699e-07	5.09403e-06	1.46468e-06	2.63642e-05	[4, 5]	Group15	4.56621	20	[CALCRL, CD34, CDH5, CLDN5, DLL4, ECSCR, EDN1, ESM1, FLT1, GJA5, HEY1, KIT, MMRN2, NOS3, NRG1, PECAM1, RGCC, RHOJ, ROBO4, SOX17]
GO:0001944	vasculature development	GO_BiologicalProcess-EBI-UniProt-GOA-ACAP-ARAP_19.11.2021_00h00	6.40183e-08	5.50557e-06	1.46468e-06	2.63642e-05	[4, 5, 6]	Group15	5.42169	18	[CALCRL, CD34, CDH5, CLDN5, DLL4, ECSCR, ESM1, FLT1, GJA5, HEY1, KIT, MMRN2, NOS3, NRG1, PECAM1, RGCC, RHOJ, ROBO4]
GO:0001568	blood vessel development	GO_BiologicalProcess-EBI-UniProt-GOA-ACAP-ARAP_19.11.2021_00h00	1.42745e-07	6.13805e-06	1.46468e-06	2.63642e-05	[3, 5, 6, 7]	Group15	5.46624	17	[CALCRL, CD34, CDH5, CLDN5, DLL4, ECSCR, ESM1, FLT1, GJA5, HEY1, MMRN2, NOS3, NRG1, PECAM1, RGCC, RHOJ, ROBO4]
GO:1901342	regulation of vasculature development	GO_BiologicalProcess-EBI-UniProt-GOA-ACAP-ARAP_19.11.2021_00h00	0.000536816	0.00184665	1.46468e-06	2.63642e-05	[4, 5, 6, 7]	Group15	4.81283	9	[CD34, CDH5, CLDN5, ECSCR, FLT1, NOS3, NRG1, RGCC, RHOJ]
GO:1901343	negative regulation of vasculature development	GO_BiologicalProcess-EBI-UniProt-GOA-ACAP-ARAP_19.11.2021_00h00	0.0170647	0.0244595	1.46468e-06	2.63642e-05	[3, 4, 5, 6, 7, 8]	Group15	5.6338	4	[CLDN5, ECSCR, NRG1, RGCC]
GO:0001525	angiogenesis	GO_BiologicalProcess-EBI-UniProt-GOA-ACAP-ARAP_19.11.2021_00h00	1.85795e-07	3.99459e-06	1.46468e-06	2.63642e-05	[3, 4, 5, 6, 7, 8, 9]	Group15	5.73477	16	[CALCRL, CD34, CDH5, CLDN5, DLL4, ECSCR, ESM1, FLT1, GJA5, HEY1, MMRN2, NOS3, NRG1, RGCC, RHOJ, ROBO4]
GO:0048514	blood vessel morphogenesis	GO_BiologicalProcess-EBI-UniProt-GOA-ACAP-ARAP_19.11.2021_00h00	4.38151e-07	6.28016e-06	1.46468e-06	2.63642e-05	[4, 5, 6, 7, 8]	Group15	5.38721	16	[CALCRL, CD34, CDH5, CLDN5, DLL4, ECSCR, ESM1, FLT1, GJA5, HEY1, MMRN2, NOS3, NRG1, RGCC, RHOJ, ROBO4]
GO:2000181	negative regulation of blood vessel morphogenesis	GO_BiologicalProcess-EBI-UniProt-GOA-ACAP-ARAP_19.11.2021_00h00	0.0162428	0.0240842	1.46468e-06	2.63642e-05	[4, 5, 6, 7, 8, 9]	Group15	5.71429	4	[CLDN5, ECSCR, NRG1, RGCC]
GO:0045765	regulation of angiogenesis	GO_BiologicalProcess-EBI-UniProt-GOA-ACAP-ARAP_19.11.2021_00h00	0.000495521	0.00185282	1.46468e-06	2.63642e-05	[4, 5, 6, 7, 8, 9, 10]	Group15	4.86486	9	[CD34, CDH5, CLDN5, ECSCR, FLT1, NOS3, NRG1, RGCC, RHOJ]
GO:0016525	negative regulation of angiogenesis	GO_BiologicalProcess-EBI-UniProt-GOA-ACAP-ARAP_19.11.2021_00h00	0.0154474	0.0233066	1.46468e-06	2.63642e-05	[4, 5, 6, 7, 8, 9, 10, 11]	Group15	5.7971	4	[CLDN5, ECSCR, NRG1, RGCC]
GO:0003013	circulatory system process	GO_BiologicalProcess-EBI-UniProt-GOA-ACAP-ARAP_19.11.2021_00h00	2.06124e-06	1.77267e-05	6.03416e-06	5.43075e-05	[3]	Group16	6.55738	12	[C2CD4B, CD34, CD36, CDH5, CLDN5, EDN1, FABP5, GJA5, NOS3, NOX4, OCLN, PDE2A]
GO:0003018	vascular process in circulatory system	GO_BiologicalProcess-EBI-UniProt-GOA-ACAP-ARAP_19.11.2021_00h00	1.81085e-06	1.73036e-05	6.03416e-06	5.43075e-05	[4]	Group16	11.7647	8	[C2CD4B, CD36, CDH5, CLDN5, EDN1, FABP5, OCLN, PDE2A]
GO:0008015	blood circulation	GO_BiologicalProcess-EBI-UniProt-GOA-ACAP-ARAP_19.11.2021_00h00	0.000208594	0.00105524	6.03416e-06	5.43075e-05	[4]	Group16	5.45455	9	[C2CD4B, CD34, CDH5, CLDN5, EDN1, GJA5, NOS3, OCLN, PDE2A]
GO:0043114	regulation of vascular permeability	GO_BiologicalProcess-EBI-UniProt-GOA-ACAP-ARAP_19.11.2021_00h00	1.23525e-05	9.65745e-05	6.03416e-06	5.43075e-05	[3, 5]	Group16	20.8333	5	[C2CD4B, CDH5, CLDN5, OCLN, PDE2A]
GO:0002064	epithelial cell development	GO_BiologicalProcess-EBI-UniProt-GOA-ACAP-ARAP_19.11.2021_00h00	0.0132162	0.0210479	6.03416e-06	5.43075e-05	[4, 5, 6]	Group16	6.06061	4	[CDH5, CLDN5, PECAM1, ROBO4]
GO:0003158	endothelium development	GO_BiologicalProcess-EBI-UniProt-GOA-ACAP-ARAP_19.11.2021_00h00	0.000294818	0.00126772	6.03416e-06	5.43075e-05	[5]	Group16	8.4507	6	[CD34, CDH5, CLDN5, NRG1, PECAM1, ROBO4]
GO:0034329	cell junction assembly	GO_BiologicalProcess-EBI-UniProt-GOA-ACAP-ARAP_19.11.2021_00h00	0.00117471	0.00306136	6.03416e-06	5.43075e-05	[5]	Group16	4.81928	8	[CDH5, CLDN5, ESAM, FAM107A, GJA5, NRG1, OCLN, PECAM1]
GO:0045216	cell-cell junction organization	GO_BiologicalProcess-EBI-UniProt-GOA-ACAP-ARAP_19.11.2021_00h00	0.00107633	0.00298596	6.03416e-06	5.43075e-05	[5]	Group16	6.66667	6	[CDH5, CLDN5, ESAM, GJA5, OCLN, PECAM1]
GO:0045446	endothelial cell differentiation	GO_BiologicalProcess-EBI-UniProt-GOA-ACAP-ARAP_19.11.2021_00h00	0.000979412	0.00290446	6.03416e-06	5.43075e-05	[5, 6]	Group16	8.62069	5	[CDH5, CLDN5, NRG1, PECAM1, ROBO4]
GO:0001885	endothelial cell development	GO_BiologicalProcess-EBI-UniProt-GOA-ACAP-ARAP_19.11.2021_00h00	0.00301251	0.0068178	6.03416e-06	5.43075e-05	[5, 6, 7]	Group16	9.09091	4	[CDH5, CLDN5, PECAM1, ROBO4]
GO:0007043	cell-cell junction assembly	GO_BiologicalProcess-EBI-UniProt-GOA-ACAP-ARAP_19.11.2021_00h00	0.000179686	0.0010302	6.03416e-06	5.43075e-05	[6]	Group16	9.23077	6	[CDH5, CLDN5, ESAM, GJA5, OCLN, PECAM1]
GO:0120193	tight junction organization	GO_BiologicalProcess-EBI-UniProt-GOA-ACAP-ARAP_19.11.2021_00h00	0.000210056	0.0010036	6.03416e-06	5.43075e-05	[6]	Group16	11.9048	5	[CDH5, CLDN5, ESAM, OCLN, PECAM1]
GO:0043297	apical junction assembly	GO_BiologicalProcess-EBI-UniProt-GOA-ACAP-ARAP_19.11.2021_00h00	0.000263367	0.00119208	6.03416e-06	5.43075e-05	[7]	Group16	11.3636	5	[CDH5, CLDN5, ESAM, OCLN, PECAM1]
GO:0061028	establishment of endothelial barrier	GO_BiologicalProcess-EBI-UniProt-GOA-ACAP-ARAP_19.11.2021_00h00	0.00230681	0.00551071	6.03416e-06	5.43075e-05	[6, 7, 8]	Group16	9.7561	4	[CDH5, CLDN5, PECAM1, ROBO4]
GO:0120192	tight junction assembly	GO_BiologicalProcess-EBI-UniProt-GOA-ACAP-ARAP_19.11.2021_00h00	0.000186729	0.00100367	6.03416e-06	5.43075e-05	[7]	Group16	12.1951	5	[CDH5, CLDN5, ESAM, OCLN, PECAM1]
GO:0070830	bicellular tight junction assembly	GO_BiologicalProcess-EBI-UniProt-GOA-ACAP-ARAP_19.11.2021_00h00	0.000146079	0.000966371	6.03416e-06	5.43075e-05	[8]	Group16	12.8205	5	[CDH5, CLDN5, ESAM, OCLN, PECAM1]
GO:0090132	epithelium migration	GO_BiologicalProcess-EBI-UniProt-GOA-ACAP-ARAP_19.11.2021_00h00	0.000575528	0.00190367	4.05816e-05	0.00024349	[3]	Group17	4.329	10	[ANGPT2, CDH5, DLL4, MMRN2, NOS3, NRG1, PIK3CG, PRSS3, RGCC, RHOJ]
GO:0001935	endothelial cell proliferation	GO_BiologicalProcess-EBI-UniProt-GOA-ACAP-ARAP_19.11.2021_00h00	0.0190115	0.0259522	4.05816e-05	0.00024349	[4]	Group17	4.38596	5	[CD34, DLL4, FLT1, MMRN2, RGCC]
GO:0010631	epithelial cell migration	GO_BiologicalProcess-EBI-UniProt-GOA-ACAP-ARAP_19.11.2021_00h00	0.000575528	0.00190367	4.05816e-05	0.00024349	[4, 5, 6]	Group17	4.329	10	[ANGPT2, CDH5, DLL4, MMRN2, NOS3, NRG1, PIK3CG, PRSS3, RGCC, RHOJ]
GO:0010632	regulation of epithelial cell migration	GO_BiologicalProcess-EBI-UniProt-GOA-ACAP-ARAP_19.11.2021_00h00	0.00273146	0.00634881	4.05816e-05	0.00024349	[3, 4, 5, 6, 7]	Group17	4.2328	8	[ANGPT2, DLL4, MMRN2, NOS3, NRG1, PIK3CG, RGCC, RHOJ]
GO:0050680	negative regulation of epithelial cell proliferation	GO_BiologicalProcess-EBI-UniProt-GOA-ACAP-ARAP_19.11.2021_00h00	0.0125229	0.020711	4.05816e-05	0.00024349	[4, 5, 6]	Group17	6.15385	4	[DLL4, FLT1, MMRN2, RGCC]
GO:0010633	negative regulation of epithelial cell migration	GO_BiologicalProcess-EBI-UniProt-GOA-ACAP-ARAP_19.11.2021_00h00	0.00114655	0.00308135	4.05816e-05	0.00024349	[3, 4, 5, 6, 7, 8]	Group17	8.33333	5	[ANGPT2, DLL4, MMRN2, NRG1, RGCC]
GO:0001937	negative regulation of endothelial cell proliferation	GO_BiologicalProcess-EBI-UniProt-GOA-ACAP-ARAP_19.11.2021_00h00	0.000999476	0.00286516	4.05816e-05	0.00024349	[5, 6, 7]	Group17	12.1212	4	[DLL4, FLT1, MMRN2, RGCC]
GO:0010594	regulation of endothelial cell migration	GO_BiologicalProcess-EBI-UniProt-GOA-ACAP-ARAP_19.11.2021_00h00	0.000519052	0.00185994	4.05816e-05	0.00024349	[4, 5, 6, 7, 8]	Group17	5.44218	8	[ANGPT2, DLL4, MMRN2, NOS3, NRG1, PIK3CG, RGCC, RHOJ]
GO:0043542	endothelial cell migration	GO_BiologicalProcess-EBI-UniProt-GOA-ACAP-ARAP_19.11.2021_00h00	6.6117e-05	0.000473839	4.05816e-05	0.00024349	[5, 6, 7]	Group17	5.61798	10	[ANGPT2, CDH5, DLL4, MMRN2, NOS3, NRG1, PIK3CG, PRSS3, RGCC, RHOJ]
GO:0010596	negative regulation of endothelial cell migration	GO_BiologicalProcess-EBI-UniProt-GOA-ACAP-ARAP_19.11.2021_00h00	0.000442031	0.00172794	4.05816e-05	0.00024349	[4, 5, 6, 7, 8, 9]	Group17	10.2041	5	[ANGPT2, DLL4, MMRN2, NRG1, RGCC]
GO:0002040	sprouting angiogenesis	GO_BiologicalProcess-EBI-UniProt-GOA-ACAP-ARAP_19.11.2021_00h00	0.0268101	0.0329381	4.05816e-05	0.00024349	[4, 5, 6, 7, 8, 9, 10]	Group17	4.93827	4	[DLL4, ESM1, MMRN2, RHOJ]
GO:0043534	blood vessel endothelial cell migration	GO_BiologicalProcess-EBI-UniProt-GOA-ACAP-ARAP_19.11.2021_00h00	0.000171297	0.00105226	4.05816e-05	0.00024349	[6, 7, 8]	Group17	7.52688	7	[ANGPT2, CDH5, DLL4, MMRN2, NOS3, RGCC, RHOJ]
GO:0043535	regulation of blood vessel endothelial cell migration	GO_BiologicalProcess-EBI-UniProt-GOA-ACAP-ARAP_19.11.2021_00h00	0.000429801	0.00176014	4.05816e-05	0.00024349	[5, 6, 7, 8, 9]	Group17	7.89474	6	[ANGPT2, DLL4, MMRN2, NOS3, RGCC, RHOJ]
GO:0048010	vascular endothelial growth factor receptor signaling pathway	GO_BiologicalProcess-EBI-UniProt-GOA-ACAP-ARAP_19.11.2021_00h00	0.00427371	0.00816753	4.05816e-05	0.00024349	[6, 7, 8]	Group17	13.0435	3	[CLEC14A, FLT1, MMRN2]
GO:0043537	negative regulation of blood vessel endothelial cell migration	GO_BiologicalProcess-EBI-UniProt-GOA-ACAP-ARAP_19.11.2021_00h00	0.000782083	0.00249108	4.05816e-05	0.00024349	[5, 6, 7, 8, 9, 10]	Group17	12.9032	4	[ANGPT2, DLL4, MMRN2, RGCC]
GO:0002042	cell migration involved in sprouting angiogenesis	GO_BiologicalProcess-EBI-UniProt-GOA-ACAP-ARAP_19.11.2021_00h00	0.0237027	0.0304243	4.05816e-05	0.00024349	[5, 6, 7, 8, 9, 10, 11]	Group17	7.14286	3	[DLL4, MMRN2, RHOJ]
GO:0090049	regulation of cell migration involved in sprouting angiogenesis	GO_BiologicalProcess-EBI-UniProt-GOA-ACAP-ARAP_19.11.2021_00h00	0.00758649	0.0130488	4.05816e-05	0.00024349	[6, 7, 8, 9, 10, 11, 12]	Group17	10.7143	3	[DLL4, MMRN2, RHOJ]
GO:0009897	external side of plasma membrane	GO_CellularComponent-EBI-UniProt-GOA-ACAP-ARAP_19.11.2021_00h00	0.00624218	0.0249687	0.00624218	0.00624218	[3, 4]	Group0	5.26316	5	[CD34, CLEC14A, LY6G5C, SELP, TNFRSF11A]
GO:0022839	ion gated channel activity	GO_MolecularFunction-EBI-UniProt-GOA-ACAP-ARAP_19.11.2021_00h00	0.010019	0.0350665	0.010019	0.010019	[6]	Group0	10.3448	3	[ANO2, KCNMB4, KCNN3]
GO:0071902	positive regulation of protein serine/threonine kinase activity	GO_MolecularFunction-EBI-UniProt-GOA-ACAP-ARAP_19.11.2021_00h00	0.00192074	0.0134452	0.00192074	0.00384149	[5, 6, 7, 8]	Group1	5.42636	7	[ADRB2, EDN1, FLT1, PIK3CG, RGCC, TCIM, TNFRSF11A]
R-HSA:202733	Cell surface interactions at the vascular wall	REACTOME_Pathways_23.11.2021	0.00868272	0.0282188	0.00868272	0.0144712	[-1]	Group0	4.37956	6	[ANGPT2, ESAM, MMP1, PECAM1, SELP, TSPAN7]
R-HSA:392154	Nitric oxide stimulates guanylate cyclase	REACTOME_Pathways_23.11.2021	0.00360997	0.0469297	0.00360997	0.0180499	[-1]	Group1	13.6364	3	[KCNMB4, NOS3, PDE2A]
R-HSA:8979227	Triglyceride metabolism	REACTOME_Pathways_23.11.2021	0.0161262	0.0419281	0.0161262	0.0201577	[-1]	Group2	8.10811	3	[FABP4, FABP5, GPAT2]
R-HSA:5083635	Defective B3GALTL causes PpS	REACTOME_Pathways_23.11.2021	0.0161262	0.0419281	0.0173675	0.0173675	[-1]	Group3	8.10811	3	[ADAMTS18, ADAMTS4, THSD7A]
R-HSA:5173214	O-glycosylation of TSR domain-containing proteins	REACTOME_Pathways_23.11.2021	0.0173675	0.0376296	0.0173675	0.0173675	[-1]	Group3	7.89474	3	[ADAMTS18, ADAMTS4, THSD7A]
R-HSA:114608	Platelet degranulation	REACTOME_Pathways_23.11.2021	0.00645811	0.0419777	0.00779089	0.0194772	[-1]	Group4	4.65116	6	[CD36, FERMT3, MMRN1, PECAM1, SELP, VWF]
R-HSA:76005	Response to elevated platelet cytosolic Ca2+	REACTOME_Pathways_23.11.2021	0.00779089	0.0337605	0.00779089	0.0194772	[-1]	Group4	4.47761	6	[CD36, FERMT3, MMRN1, PECAM1, SELP, VWF]
