# Supplementary material for: Understanding Cell Model Characteristics—RNA Expression Profiling in Primary and Immortalized Human Mesothelial Cells, and in Human Vein and Microvascular Endothelial Cells
Source: Cells. 2022 Oct 5;11(19):3133. doi: 10.3390/cells11193133 (PMC9563025; doi:10.3390/cells11193133)
Supplement: Supplementary file 1 [file cells-11-03133-s001.zip › Supplemental table S5_DEG between mesothelial and endothelial cells.xlsx]

## Sheet: Tabelle1
ID	Term	Ontology Source	Term PValue	Term PValue Corrected with Benjamini-Hochberg	Group PValue	Group PValue Corrected with Benjamini-Hochberg	GOLevels	GOGroups	% Associated Genes	Nr. Genes	Associated Genes Found
GO:2001237	negative regulation of extrinsic apoptotic signaling pathway	GO_BiologicalProcess-EBI-UniProt-GOA-ACAP-ARAP_19.11.2021_00h00	0.0083375	0.0316825	0.0083375	0.016675	[5, 6, 7, 8, 9]	Group00	6.89655	4	[IFI6, ITGA6, PELI3, TNFAIP3]
GO:0008360	regulation of cell shape	GO_BiologicalProcess-EBI-UniProt-GOA-ACAP-ARAP_19.11.2021_00h00	0.0139344	0.0361028	0.0139344	0.0216757	[3, 5, 6]	Group01	5.97015	4	[FMNL3, PARVB, SLC9A3R1, SYNE3]
GO:0008593	regulation of Notch signaling pathway	GO_BiologicalProcess-EBI-UniProt-GOA-ACAP-ARAP_19.11.2021_00h00	0.0207353	0.0381261	0.0207353	0.0263903	[4, 5, 6, 7]	Group02	7.5	3	[ARRB1, EGFL7, TSPAN14]
GO:0035023	regulation of Rho protein signal transduction	GO_BiologicalProcess-EBI-UniProt-GOA-ACAP-ARAP_19.11.2021_00h00	0.0221901	0.0395262	0.0221901	0.0258885	[7, 8, 9]	Group03	7.31707	3	[ARRB1, BCR, EPS8L2]
GO:0042813	Wnt-activated receptor activity	GO_BiologicalProcess-EBI-UniProt-GOA-ACAP-ARAP_19.11.2021_00h00	0.000749666	0.042731	0.000749666	0.0104953	[5, 6, 7, 8]	Group04	23.0769	3	[FZD1, FZD4, FZD8]
GO:0015698	inorganic anion transport	GO_BiologicalProcess-EBI-UniProt-GOA-ACAP-ARAP_19.11.2021_00h00	0.0140921	0.034924	0.0140921	0.019729	[6]	Group05	4.71698	5	[APOL1, CEBPB, LRRC8A, SLC9A3R1, STX1A]
GO:0005253	anion channel activity	GO_BiologicalProcess-EBI-UniProt-GOA-ACAP-ARAP_19.11.2021_00h00	0.0125229	0.0356903	0.0140921	0.019729	[6, 7, 8, 9]	Group05	6.15385	4	[APOL1, LRRC8A, SLC9A3R1, STX1A]
GO:0061448	connective tissue development	GO_BiologicalProcess-EBI-UniProt-GOA-ACAP-ARAP_19.11.2021_00h00	0.00734394	0.0322004	0.00734394	0.020563	[4]	Group06	7.14286	4	[EFEMP1, HYAL2, ITGB8, PDGFA]
GO:0051216	cartilage development	GO_BiologicalProcess-EBI-UniProt-GOA-ACAP-ARAP_19.11.2021_00h00	0.0221901	0.0395262	0.00734394	0.020563	[4, 5, 6]	Group06	7.31707	3	[EFEMP1, HYAL2, ITGB8]
GO:0036294	cellular response to decreased oxygen levels	GO_BiologicalProcess-EBI-UniProt-GOA-ACAP-ARAP_19.11.2021_00h00	0.0235865	0.0407403	0.0235865	0.0254008	[5]	Group07	5.12821	4	[BNIP3, EPAS1, PDK1, PDK3]
GO:0071456	cellular response to hypoxia	GO_BiologicalProcess-EBI-UniProt-GOA-ACAP-ARAP_19.11.2021_00h00	0.0235865	0.0407403	0.0235865	0.0254008	[4, 6]	Group07	5.12821	4	[BNIP3, EPAS1, PDK1, PDK3]
GO:0050886	endocrine process	GO_BiologicalProcess-EBI-UniProt-GOA-ACAP-ARAP_19.11.2021_00h00	0.0131911	0.0358045	0.0118543	0.020745	[3]	Group08	8.82353	3	[ECE1, RAB11FIP1, TBX3]
GO:0048736	appendage development	GO_BiologicalProcess-EBI-UniProt-GOA-ACAP-ARAP_19.11.2021_00h00	0.0111148	0.0351968	0.0118543	0.020745	[3, 4]	Group08	9.375	3	[ECE1, ITGA6, TBX3]
GO:0060173	limb development	GO_BiologicalProcess-EBI-UniProt-GOA-ACAP-ARAP_19.11.2021_00h00	0.0111148	0.0351968	0.0118543	0.020745	[4, 5]	Group08	9.375	3	[ECE1, ITGA6, TBX3]
GO:0045744	negative regulation of G protein-coupled receptor signaling pathway	GO_BiologicalProcess-EBI-UniProt-GOA-ACAP-ARAP_19.11.2021_00h00	0.0121263	0.0363789	0.00377021	0.0175943	[4, 5, 6, 7]	Group09	9.09091	3	[APLP1, ARRB1, SNCA]
GO:1901983	regulation of protein acetylation	GO_BiologicalProcess-EBI-UniProt-GOA-ACAP-ARAP_19.11.2021_00h00	0.00385622	0.0219805	0.00377021	0.0175943	[6, 7, 8, 9]	Group09	8.51064	4	[ARRB1, NFYB, RAPGEF3, SNCA]
GO:2000756	regulation of peptidyl-lysine acetylation	GO_BiologicalProcess-EBI-UniProt-GOA-ACAP-ARAP_19.11.2021_00h00	0.00190652	0.0217343	0.00377021	0.0175943	[7, 8, 9, 10]	Group09	10.2564	4	[ARRB1, NFYB, RAPGEF3, SNCA]
GO:0035065	regulation of histone acetylation	GO_BiologicalProcess-EBI-UniProt-GOA-ACAP-ARAP_19.11.2021_00h00	0.00155781	0.0295984	0.00377021	0.0175943	[7, 8, 9, 10, 11, 12]	Group09	10.8108	4	[ARRB1, NFYB, RAPGEF3, SNCA]
GO:0099003	vesicle-mediated transport in synapse	GO_BiologicalProcess-EBI-UniProt-GOA-ACAP-ARAP_19.11.2021_00h00	0.00241688	0.0229603	0.00774813	0.018079	[3, 5]	Group10	15.7895	3	[PLD1, SNCA, STX1A]
GO:0099504	synaptic vesicle cycle	GO_BiologicalProcess-EBI-UniProt-GOA-ACAP-ARAP_19.11.2021_00h00	0.00172434	0.0245718	0.00774813	0.018079	[4, 6]	Group10	17.6471	3	[PLD1, SNCA, STX1A]
GO:0098916	anterograde trans-synaptic signaling	GO_BiologicalProcess-EBI-UniProt-GOA-ACAP-ARAP_19.11.2021_00h00	0.0291077	0.047404	0.00774813	0.018079	[5, 6]	Group10	4.81928	4	[LYNX1, NPTXR, SNCA, STX1A]
GO:0007268	chemical synaptic transmission	GO_BiologicalProcess-EBI-UniProt-GOA-ACAP-ARAP_19.11.2021_00h00	0.0291077	0.047404	0.00774813	0.018079	[6, 7]	Group10	4.81928	4	[LYNX1, NPTXR, SNCA, STX1A]
GO:0048880	sensory system development	GO_BiologicalProcess-EBI-UniProt-GOA-ACAP-ARAP_19.11.2021_00h00	0.00999224	0.0335034	0.00377021	0.0175943	[4, 5]	Group11	6.55738	4	[EFEMP1, FOXC1, FZD4, SMARCD3]
GO:0007423	sensory organ development	GO_BiologicalProcess-EBI-UniProt-GOA-ACAP-ARAP_19.11.2021_00h00	0.00377021	0.023878	0.00377021	0.0175943	[4, 5, 6]	Group11	6.41026	5	[ECE1, EFEMP1, FOXC1, FZD4, SMARCD3]
GO:0150063	visual system development	GO_BiologicalProcess-EBI-UniProt-GOA-ACAP-ARAP_19.11.2021_00h00	0.00941817	0.0335522	0.00377021	0.0175943	[5, 6]	Group11	6.66667	4	[EFEMP1, FOXC1, FZD4, SMARCD3]
GO:0001654	eye development	GO_BiologicalProcess-EBI-UniProt-GOA-ACAP-ARAP_19.11.2021_00h00	0.00941817	0.0335522	0.00377021	0.0175943	[5, 6, 7]	Group11	6.66667	4	[EFEMP1, FOXC1, FZD4, SMARCD3]
GO:0043010	camera-type eye development	GO_BiologicalProcess-EBI-UniProt-GOA-ACAP-ARAP_19.11.2021_00h00	0.0154835	0.0353024	0.00377021	0.0175943	[6, 7, 8]	Group11	8.33333	3	[EFEMP1, FZD4, SMARCD3]
GO:0010720	positive regulation of cell development	GO_BiologicalProcess-EBI-UniProt-GOA-ACAP-ARAP_19.11.2021_00h00	0.0235865	0.0407403	0.0572139	0.0572139	[4, 5, 6]	Group12	5.12821	4	[OBSL1, PRKCH, SMARCD3, TGM2]
GO:0051960	regulation of nervous system development	GO_BiologicalProcess-EBI-UniProt-GOA-ACAP-ARAP_19.11.2021_00h00	0.00941817	0.0335522	0.0572139	0.0572139	[4, 5, 6]	Group12	6.66667	4	[OBSL1, PRKCH, SMARCD3, TGM2]
GO:0051962	positive regulation of nervous system development	GO_BiologicalProcess-EBI-UniProt-GOA-ACAP-ARAP_19.11.2021_00h00	0.00252752	0.0205812	0.0572139	0.0572139	[3, 4, 5, 6, 7]	Group12	9.52381	4	[OBSL1, PRKCH, SMARCD3, TGM2]
GO:0050767	regulation of neurogenesis	GO_BiologicalProcess-EBI-UniProt-GOA-ACAP-ARAP_19.11.2021_00h00	0.00485092	0.0251366	0.0572139	0.0572139	[5, 6, 7, 8]	Group12	8	4	[OBSL1, PRKCH, SMARCD3, TGM2]
GO:0050769	positive regulation of neurogenesis	GO_BiologicalProcess-EBI-UniProt-GOA-ACAP-ARAP_19.11.2021_00h00	0.00140157	0.0399448	0.0572139	0.0572139	[4, 5, 6, 7, 8, 9]	Group12	11.1111	4	[OBSL1, PRKCH, SMARCD3, TGM2]
GO:0006919	activation of cysteine-type endopeptidase activity involved in apoptotic process	GO_BiologicalProcess-EBI-UniProt-GOA-ACAP-ARAP_19.11.2021_00h00	0.00783004	0.0318795	0.00545171	0.019081	[7, 8, 10, 11, 12, 13]	Group13	7.01754	4	[CARD8, CTSH, HIP1R, SNCA]
GO:0002237	response to molecule of bacterial origin	GO_BiologicalProcess-EBI-UniProt-GOA-ACAP-ARAP_19.11.2021_00h00	0.026681	0.0447299	0.00545171	0.019081	[4, 6]	Group13	4.03226	5	[CARD8, PELI1, SNCA, TLR4, TNFAIP3]
GO:0032496	response to lipopolysaccharide	GO_BiologicalProcess-EBI-UniProt-GOA-ACAP-ARAP_19.11.2021_00h00	0.017685	0.0360017	0.00545171	0.019081	[4, 5, 7]	Group13	4.46429	5	[CARD8, PELI1, SNCA, TLR4, TNFAIP3]
GO:0031663	lipopolysaccharide-mediated signaling pathway	GO_BiologicalProcess-EBI-UniProt-GOA-ACAP-ARAP_19.11.2021_00h00	0.0167122	0.0352814	0.00545171	0.019081	[4, 5, 6, 7, 9]	Group13	8.10811	3	[CARD8, TLR4, TNFAIP3]
GO:0048008	platelet-derived growth factor receptor signaling pathway	GO_BiologicalProcess-EBI-UniProt-GOA-ACAP-ARAP_19.11.2021_00h00	0.00374706	0.0266978	0.00545171	0.019081	[6, 7, 8]	Group13	13.6364	3	[HIP1R, PDGFA, SNCA]
GO:0043028	cysteine-type endopeptidase regulator activity involved in apoptotic process	GO_BiologicalProcess-EBI-UniProt-GOA-ACAP-ARAP_19.11.2021_00h00	0.00612098	0.0290746	0.00545171	0.019081	[5, 7, 9, 10, 11]	Group13	11.5385	3	[CARD8, CTSH, SNCA]
GO:0032088	negative regulation of NF-kappaB transcription factor activity	GO_BiologicalProcess-EBI-UniProt-GOA-ACAP-ARAP_19.11.2021_00h00	0.0196925	0.0374158	0.000837266	0.00586086	[5, 8, 9, 10, 11, 12, 13, 14, 15]	Group14	5.40541	4	[ARRB1, CARD8, IRAK2, TNFAIP3]
GO:0060759	regulation of response to cytokine stimulus	GO_BiologicalProcess-EBI-UniProt-GOA-ACAP-ARAP_19.11.2021_00h00	0.0158176	0.0346771	0.000837266	0.00586086	[3, 4, 5]	Group14	4.58716	5	[CARD8, IRAK2, PELI3, SH2B3, TLR4]
GO:0002221	pattern recognition receptor signaling pathway	GO_BiologicalProcess-EBI-UniProt-GOA-ACAP-ARAP_19.11.2021_00h00	0.0190115	0.0373675	0.000837266	0.00586086	[4, 5, 6]	Group14	4.38596	5	[PTPRS, SCARA3, SEC14L1, TLR4, TNFAIP3]
GO:0002237	response to molecule of bacterial origin	GO_BiologicalProcess-EBI-UniProt-GOA-ACAP-ARAP_19.11.2021_00h00	0.026681	0.0447299	0.000837266	0.00586086	[4, 6]	Group14	4.03226	5	[CARD8, PELI1, SNCA, TLR4, TNFAIP3]
GO:0032496	response to lipopolysaccharide	GO_BiologicalProcess-EBI-UniProt-GOA-ACAP-ARAP_19.11.2021_00h00	0.017685	0.0360017	0.000837266	0.00586086	[4, 5, 7]	Group14	4.46429	5	[CARD8, PELI1, SNCA, TLR4, TNFAIP3]
GO:0002224	toll-like receptor signaling pathway	GO_BiologicalProcess-EBI-UniProt-GOA-ACAP-ARAP_19.11.2021_00h00	0.014678	0.0348603	0.000837266	0.00586086	[5, 6, 7]	Group14	5.88235	4	[PTPRS, SCARA3, TLR4, TNFAIP3]
GO:0031663	lipopolysaccharide-mediated signaling pathway	GO_BiologicalProcess-EBI-UniProt-GOA-ACAP-ARAP_19.11.2021_00h00	0.0167122	0.0352814	0.000837266	0.00586086	[4, 5, 6, 7, 9]	Group14	8.10811	3	[CARD8, TLR4, TNFAIP3]
GO:0030027	lamellipodium	GO_CellularComponent-EBI-UniProt-GOA-ACAP-ARAP_19.11.2021_00h00	0.0346829	0.0346829	0.0346829	0.0346829	[3, 4]	Group0	4.21053	4	[ABLIM1, PARVB, PLXND1, RAPGEF3]
GO:0098858	actin-based cell projection	GO_CellularComponent-EBI-UniProt-GOA-ACAP-ARAP_19.11.2021_00h00	0.00131065	0.00524258	0.00131065	0.00262129	[4]	Group1	7.46269	5	[HYAL2, MYO5A, RAPGEF3, SLC9A3R1, UTRN]
GO:0005902	microvillus	GO_CellularComponent-EBI-UniProt-GOA-ACAP-ARAP_19.11.2021_00h00	0.0123174	0.0246348	0.00131065	0.00262129	[5]	Group1	8.33333	3	[HYAL2, RAPGEF3, SLC9A3R1]
GO:0030175	filopodium	GO_CellularComponent-EBI-UniProt-GOA-ACAP-ARAP_19.11.2021_00h00	0.0165382	0.0220509	0.00131065	0.00262129	[5]	Group1	7.5	3	[MYO5A, RAPGEF3, UTRN]
GO:0003779	actin binding	GO_MolecularFunction-EBI-UniProt-GOA-ACAP-ARAP_19.11.2021_00h00	0.00222432	0.011863	0.00222432	0.00556079	[4]	Group0	4.51613	7	[CORO7, EPS8L2, HIP1R, PLEKHG3, SNCA, SYNE3, UTRN]
GO:0016798	hydrolase activity, acting on glycosyl bonds	GO_MolecularFunction-EBI-UniProt-GOA-ACAP-ARAP_19.11.2021_00h00	0.0229331	0.0458662	0.0229331	0.0286664	[3]	Group1	4.70588	4	[EGFL7, HYAL2, PTX3, SARM1]
GO:0032088	negative regulation of NF-kappaB transcription factor activity	GO_MolecularFunction-EBI-UniProt-GOA-ACAP-ARAP_19.11.2021_00h00	0.0142099	0.0324798	0.0142099	0.0236832	[3, 4, 5]	Group2	5.40541	4	[ARRB1, CARD8, IRAK2, TNFAIP3]
GO:0015103	inorganic anion transmembrane transporter activity	GO_MolecularFunction-EBI-UniProt-GOA-ACAP-ARAP_19.11.2021_00h00	0.0248183	0.0441215	0.0248183	0.0248183	[4, 5]	Group3	4.5977	4	[APOL1, LRRC8A, SLC9A3R1, STX1A]
GO:0005253	anion channel activity	GO_MolecularFunction-EBI-UniProt-GOA-ACAP-ARAP_19.11.2021_00h00	0.00897669	0.0239379	0.0248183	0.0248183	[5, 6]	Group3	6.15385	4	[APOL1, LRRC8A, SLC9A3R1, STX1A]
GO:0030165	PDZ domain binding	GO_MolecularFunction-EBI-UniProt-GOA-ACAP-ARAP_19.11.2021_00h00	1.63167e-05	0.000261068	4.11686e-05	0.000205843	[4]	Group4	12.766	6	[ARHGAP29, FZD1, FZD4, FZD8, SLC22A5, SLC9A3R1]
GO:0042813	Wnt-activated receptor activity	GO_MolecularFunction-EBI-UniProt-GOA-ACAP-ARAP_19.11.2021_00h00	0.000566811	0.00453449	4.11686e-05	0.000205843	[4]	Group4	23.0769	3	[FZD1, FZD4, FZD8]
GO:0043028	cysteine-type endopeptidase regulator activity involved in apoptotic process	GO_MolecularFunction-EBI-UniProt-GOA-ACAP-ARAP_19.11.2021_00h00	0.00467171	0.0186869	0.0142099	0.0236832	[3, 4, 8]	Group5	11.5385	3	[CARD8, CTSH, SNCA]
GO:0006919	activation of cysteine-type endopeptidase activity involved in apoptotic process	GO_MolecularFunction-EBI-UniProt-GOA-ACAP-ARAP_19.11.2021_00h00	0.00557963	0.0178548	0.0142099	0.0236832	[8, 9]	Group5	7.01754	4	[CARD8, CTSH, HIP1R, SNCA]
R-HSA:373080	Class B/2 (Secretin family receptors)	REACTOME_Pathways_23.11.2021	0.0389673	0.0476267	0.0389673	0.0389673	[-1]	Group0	4.21053	4	[FZD1, FZD4, FZD8, GNG11]
R-HSA:210991	Basigin interactions	REACTOME_Pathways_23.11.2021	0.00476972	0.017489	0.00476972	0.00953944	[-1]	Group1	12	3	[ATP1B1, ITGA6, SLC7A7]
R-HSA:1630316	Glycosaminoglycan metabolism	REACTOME_Pathways_23.11.2021	0.0220597	0.0404428	0.0220597	0.0264717	[-1]	Group2	4.03226	5	[CHST11, GLCE, HS6ST1, HYAL2, SDC4]
R-HSA:1638091	Heparan sulfate/heparin (HS-GAG) metabolism	REACTOME_Pathways_23.11.2021	0.0430602	0.0473662	0.0220597	0.0264717	[-1]	Group2	5.45455	3	[GLCE, HS6ST1, SDC4]
R-HSA:2022928	HS-GAG biosynthesis	REACTOME_Pathways_23.11.2021	0.0088932	0.019565	0.0220597	0.0264717	[-1]	Group2	9.67742	3	[GLCE, HS6ST1, SDC4]
R-HSA:2022090	Assembly of collagen fibrils and other multimeric structures	REACTOME_Pathways_23.11.2021	0.00844244	0.0206371	0.00219965	0.00659896	[-1]	Group3	6.55738	4	[COL18A1, COL8A2, ITGA6, LAMA3]
R-HSA:216083	Integrin cell surface interactions	REACTOME_Pathways_23.11.2021	0.0268936	0.0455122	0.00219965	0.00659896	[-1]	Group3	4.70588	4	[COL18A1, COL8A2, ITGA6, ITGB8]
R-HSA:3000157	Laminin interactions	REACTOME_Pathways_23.11.2021	0.00809573	0.0222633	0.00219965	0.00659896	[-1]	Group3	10	3	[COL18A1, ITGA6, LAMA3]
R-HSA:3000171	Non-integrin membrane-ECM interactions	REACTOME_Pathways_23.11.2021	0.00748545	0.0235257	0.00219965	0.00659896	[-1]	Group3	6.77966	4	[ITGA6, LAMA3, PDGFA, SDC4]
R-HSA:8980692	RHOA GTPase cycle	REACTOME_Pathways_23.11.2021	0.000375154	0.00412669	2.20093e-05	0.000132056	[-1]	Group4	5.44218	8	[ARAP3, ARHGAP29, ARHGEF28, BCR, FMNL3, PLD1, PLEKHG3, STARD13]
R-HSA:9013026	RHOB GTPase cycle	REACTOME_Pathways_23.11.2021	0.0137733	0.0275467	2.20093e-05	0.000132056	[-1]	Group4	5.71429	4	[ARHGEF28, BCR, RHOB, STARD13]
R-HSA:9013106	RHOC GTPase cycle	REACTOME_Pathways_23.11.2021	0.00241469	0.0106246	2.20093e-05	0.000132056	[-1]	Group4	6.75676	5	[ARHGEF28, BCR, FMNL2, FMNL3, STARD13]
R-HSA:9013148	CDC42 GTPase cycle	REACTOME_Pathways_23.11.2021	1.30262e-05	0.000286577	2.20093e-05	0.000132056	[-1]	Group4	6.45161	10	[ARAP3, ARHGAP29, BCR, DOCK6, DOCK9, FMNL2, FMNL3, PLD1, PLEKHG3, STARD13]
R-HSA:9013149	RAC1 GTPase cycle	REACTOME_Pathways_23.11.2021	0.00175098	0.0096304	2.20093e-05	0.000132056	[-1]	Group4	4.32432	8	[ARAP3, ARHGAP29, BCR, DOCK6, DOCK9, PLD1, PLEKHG3, SWAP70]
R-HSA:168138	Toll Like Receptor 9 (TLR9) Cascade	REACTOME_Pathways_23.11.2021	0.0403313	0.0466994	0.00829538	0.0124431	[-1]	Group5	4.16667	4	[IRAK2, PELI1, PELI3, TLR4]
R-HSA:168181	Toll Like Receptor 7/8 (TLR7/8) Cascade	REACTOME_Pathways_23.11.2021	0.0363261	0.0470102	0.00829538	0.0124431	[-1]	Group5	4.30108	4	[IRAK2, PELI1, PELI3, TLR4]
R-HSA:937072	TRAF6-mediated induction of TAK1 complex within TLR4 complex	REACTOME_Pathways_23.11.2021	0.00150181	0.0110133	0.00829538	0.0124431	[-1]	Group5	17.6471	3	[IRAK2, SARM1, TLR4]
R-HSA:975138	TRAF6 mediated induction of NFkB and MAP kinases upon TLR7/8 or 9 activation	REACTOME_Pathways_23.11.2021	0.0337996	0.0495727	0.00829538	0.0124431	[-1]	Group5	4.3956	4	[IRAK2, PELI1, PELI3, TLR4]
R-HSA:975155	MyD88 dependent cascade initiated on endosome	REACTOME_Pathways_23.11.2021	0.0350486	0.0481918	0.00829538	0.0124431	[-1]	Group5	4.34783	4	[IRAK2, PELI1, PELI3, TLR4]
