# Supplementary material for: Understanding Cell Model Characteristics—RNA Expression Profiling in Primary and Immortalized Human Mesothelial Cells, and in Human Vein and Microvascular Endothelial Cells
Source: Cells. 2022 Oct 5;11(19):3133. doi: 10.3390/cells11193133 (PMC9563025; doi:10.3390/cells11193133)
Supplement: Supplementary file 1 [file cells-11-03133-s001.zip › Supplemental table S6_Mesothelium terms.xlsx]

## Sheet: Mesothelial GSEA
Mesothelial cells (FDR <0.05)		632 up	453 down
Gene Ontology Term	Size	Enrichment Score (ES)	Normalized Enrichment Score (NES)	NOM p-val	FDR q-val	FWER p-val	Rank at Max	Leading Edge
GOMF_EXTRACELLULAR_MATRIX_STRUCTURAL_CONSTITUENT	84	0.775535	2.77005	0	0	0	659	tags=54%, list=6%, signal=57%
GOCC_EXTERNAL_ENCAPSULATING_STRUCTURE	237	0.671547	2.7566	0	0	0	1240	tags=48%, list=12%, signal=53%
GOBP_EXTERNAL_ENCAPSULATING_STRUCTURE_ORGANIZATION	219	0.678134	2.73362	0	0	0	1367	tags=52%, list=13%, signal=58%
GOCC_COLLAGEN_CONTAINING_EXTRACELLULAR_MATRIX	199	0.68345	2.71805	0	0	0	843	tags=45%, list=8%, signal=48%
GOBP_COLLAGEN_METABOLIC_PROCESS	60	0.750576	2.52852	0	0	0	1404	tags=65%, list=13%, signal=74%
GOCC_ENDOPLASMIC_RETICULUM_LUMEN	185	0.638126	2.48385	0	0	0	1962	tags=52%, list=18%, signal=63%
GOMF_INTEGRIN_BINDING	78	0.660567	2.354	0	0	0	1367	tags=54%, list=13%, signal=61%
GOBP_REGULATION_OF_VASCULATURE_DEVELOPMENT	163	0.603654	2.3393	0	0	0	1170	tags=39%, list=11%, signal=43%
GOBP_NEGATIVE_REGULATION_OF_VASCULATURE_DEVELOPMENT	56	0.700543	2.32725	0	0	0	1118	tags=41%, list=11%, signal=46%
GOCC_COLLAGEN_TRIMER	35	0.781468	2.31933	0	0	0	539	tags=46%, list=5%, signal=48%
GOCC_BASEMENT_MEMBRANE	55	0.700412	2.31394	0	0	0	785	tags=47%, list=7%, signal=51%
GOMF_GROWTH_FACTOR_BINDING	81	0.645633	2.30016	0	0	0	1362	tags=49%, list=13%, signal=56%
GOBP_COLLAGEN_FIBRIL_ORGANIZATION	36	0.743129	2.28428	0	0	0	877	tags=50%, list=8%, signal=54%
GOBP_PLATELET_DEGRANULATION	76	0.65415	2.2756	0	0	0	2362	tags=61%, list=22%, signal=77%
GOCC_BLOOD_MICROPARTICLE	42	0.717051	2.26952	0	0	0	1426	tags=45%, list=13%, signal=52%
GOBP_WOUND_HEALING	305	0.543971	2.26324	0	0	0	1276	tags=32%, list=12%, signal=35%
GOBP_RESPONSE_TO_TRANSFORMING_GROWTH_FACTOR_BETA	172	0.576864	2.2609	0	0	0	1362	tags=33%, list=13%, signal=37%
GOMF_COLLAGEN_BINDING	45	0.7327	2.25973	0	0	0	583	tags=49%, list=5%, signal=52%
GOBP_MUSCLE_CELL_MIGRATION	57	0.687581	2.24839	0	0	0	854	tags=37%, list=8%, signal=40%
GOBP_POSITIVE_REGULATION_OF_CELL_ADHESION	225	0.559769	2.24502	0	0	0	1305	tags=35%, list=12%, signal=39%
GOBP_EXTRACELLULAR_MATRIX_DISASSEMBLY	41	0.719013	2.24076	0	0	0	1367	tags=63%, list=13%, signal=73%
GOBP_EXTRACELLULAR_MATRIX_ASSEMBLY	31	0.76257	2.23733	0	0	0	815	tags=52%, list=8%, signal=56%
GOBP_TRANSFORMING_GROWTH_FACTOR_BETA_RECEPTOR_SIGNALING_PATHWAY	141	0.580525	2.22912	0	0	0	1362	tags=34%, list=13%, signal=39%
GOBP_CD4_POSITIVE_ALPHA_BETA_T_CELL_ACTIVATION	40	0.714597	2.21841	0	0	0	1309	tags=55%, list=12%, signal=62%
GOBP_CONNECTIVE_TISSUE_DEVELOPMENT	143	0.57735	2.21025	0	4.52926e-05	0.001	1334	tags=36%, list=13%, signal=41%
GOMF_SERINE_HYDROLASE_ACTIVITY	46	0.697078	2.19851	0	4.35506e-05	0.001	839	tags=30%, list=8%, signal=33%
GOBP_POSITIVE_REGULATION_OF_ENDOTHELIAL_CELL_MIGRATION	80	0.620897	2.19847	0	4.19376e-05	0.001	1738	tags=50%, list=16%, signal=59%
GOCC_SARCOLEMMA	70	0.628451	2.18551	0	0.000120745	0.003	1660	tags=44%, list=16%, signal=52%
GOBP_HETEROPHILIC_CELL_CELL_ADHESION_VIA_PLASMA_MEMBRANE_CELL_ADHESION_MOLECULES	22	0.807391	2.18515	0	0.000116582	0.003	1137	tags=59%, list=11%, signal=66%
GOBP_SMOOTH_MUSCLE_CELL_MIGRATION	48	0.687057	2.17658	0	0.000112696	0.003	854	tags=40%, list=8%, signal=43%
GOBP_NEGATIVE_REGULATION_OF_PEPTIDASE_ACTIVITY	111	0.593399	2.17538	0	0.00010906	0.003	1118	tags=31%, list=11%, signal=34%
GOCC_PLATELET_ALPHA_GRANULE_LUMEN	37	0.701936	2.17265	0	0.000105652	0.003	1240	tags=43%, list=12%, signal=49%
GOMF_GLYCOSAMINOGLYCAN_BINDING	88	0.612795	2.16745	0	0.000102451	0.003	679	tags=36%, list=6%, signal=39%
GOCC_PLATELET_ALPHA_GRANULE	53	0.673343	2.16729	0	9.94374e-05	0.003	1240	tags=38%, list=12%, signal=43%
GOBP_NEGATIVE_REGULATION_OF_PROTEOLYSIS	176	0.54382	2.16624	0	9.65963e-05	0.003	1118	tags=25%, list=11%, signal=27%
GOBP_REGULATION_OF_COMPLEMENT_ACTIVATION	17	0.829106	2.15318	0	0.000124357	0.004	980	tags=65%, list=9%, signal=71%
GOBP_REGULATION_OF_ENDOTHELIAL_CELL_MIGRATION	120	0.571321	2.14617	0	0.000150975	0.005	1738	tags=45%, list=16%, signal=53%
GOBP_CD4_POSITIVE_ALPHA_BETA_T_CELL_DIFFERENTIATION	33	0.71827	2.14613	0	0.000147002	0.005	1292	tags=55%, list=12%, signal=62%
GOBP_CARTILAGE_DEVELOPMENT	107	0.578226	2.14329	0	0.000143233	0.005	1404	tags=37%, list=13%, signal=43%
GOBP_COMPLEMENT_ACTIVATION	20	0.798678	2.13856	0	0.000139652	0.005	1132	tags=60%, list=11%, signal=67%
GOBP_COLLAGEN_BIOSYNTHETIC_PROCESS	31	0.719238	2.13576	0	0.000136246	0.005	791	tags=55%, list=7%, signal=59%
GOBP_REGULATION_OF_HUMORAL_IMMUNE_RESPONSE	21	0.784398	2.13278	0	0.000133002	0.005	980	tags=57%, list=9%, signal=63%
GOBP_MEMBRANE_PROTEIN_ECTODOMAIN_PROTEOLYSIS	30	0.712842	2.12928	0	0.000155787	0.006	1102	tags=47%, list=10%, signal=52%
GOMF_PROTEASE_BINDING	86	0.59771	2.12902	0	0.000152247	0.006	1145	tags=28%, list=11%, signal=31%
GOBP_POSITIVE_REGULATION_OF_CELL_CELL_ADHESION	126	0.56449	2.12496	0	0.000198447	0.008	1292	tags=35%, list=12%, signal=39%
GOBP_T_CELL_DIFFERENTIATION_INVOLVED_IN_IMMUNE_RESPONSE	31	0.726622	2.12195	0	0.000194133	0.008	1292	tags=52%, list=12%, signal=59%
GOBP_REGULATION_OF_WOUND_HEALING	68	0.618939	2.11971	0	0.000190003	0.008	1118	tags=34%, list=11%, signal=38%
GOMF_EXTRACELLULAR_MATRIX_STRUCTURAL_CONSTITUENT_CONFERRING_TENSILE_STRENGTH	21	0.794532	2.11943	0	0.000186044	0.008	539	tags=48%, list=5%, signal=50%
GOCC_PLASMA_MEMBRANE_RAFT	62	0.629644	2.11663	0	0.000182247	0.008	1105	tags=34%, list=10%, signal=38%
GOBP_REGULATION_OF_CELLULAR_RESPONSE_TO_GROWTH_FACTOR_STIMULUS	171	0.53935	2.11373	0	0.000223669	0.01	2307	tags=50%, list=22%, signal=63%
GOBP_OLEFINIC_COMPOUND_METABOLIC_PROCESS	48	0.650923	2.10917	0	0.000219283	0.01	1200	tags=31%, list=11%, signal=35%
GOMF_HEPARIN_BINDING	64	0.625518	2.10882	0	0.000215066	0.01	635	tags=39%, list=6%, signal=41%
GOBP_NEGATIVE_REGULATION_OF_WOUND_HEALING	32	0.689962	2.10439	0	0.000232255	0.011	258	tags=28%, list=2%, signal=29%
GOBP_BONE_MINERALIZATION	61	0.620241	2.10216	0	0.000227954	0.011	1492	tags=43%, list=14%, signal=49%
GOBP_COAGULATION	185	0.527865	2.10066	0	0.000223809	0.011	1426	tags=30%, list=13%, signal=34%
GOCC_COMPLEX_OF_COLLAGEN_TRIMERS	15	0.832402	2.10022	0	0.000239627	0.012	539	tags=67%, list=5%, signal=70%
GOBP_HOMOTYPIC_CELL_CELL_ADHESION	52	0.638038	2.09862	0	0.000235423	0.012	1426	tags=48%, list=13%, signal=55%
GOBP_REGULATION_OF_COLLAGEN_METABOLIC_PROCESS	27	0.718843	2.09829	0	0.000231364	0.012	1404	tags=67%, list=13%, signal=77%
GOBP_T_CELL_ACTIVATION_INVOLVED_IN_IMMUNE_RESPONSE	41	0.665488	2.09806	0	0.000227442	0.012	1403	tags=46%, list=13%, signal=53%
GOBP_ENDOCYTOSIS	350	0.49916	2.09664	0	0.000241958	0.013	2587	tags=45%, list=24%, signal=57%
GOBP_REGULATION_OF_CELLULAR_RESPONSE_TO_TRANSFORMING_GROWTH_FACTOR_BETA_STIMULUS	92	0.580067	2.09588	0	0.000256298	0.014	1362	tags=38%, list=13%, signal=43%
GOBP_BIOMINERALIZATION	79	0.598635	2.09039	0	0.000323907	0.018	1492	tags=39%, list=14%, signal=45%
GOMF_CALCIUM_ION_TRANSMEMBRANE_TRANSPORTER_ACTIVITY	50	0.642942	2.08979	0	0.000318765	0.018	1743	tags=46%, list=16%, signal=55%
GOBP_VASCULAR_PROCESS_IN_CIRCULATORY_SYSTEM	115	0.563238	2.08379	0	0.000487979	0.028	1686	tags=42%, list=16%, signal=49%
GOBP_POSITIVE_REGULATION_OF_EPITHELIAL_CELL_MIGRATION	110	0.569004	2.08357	0	0.000497542	0.028	1738	tags=43%, list=16%, signal=51%
GOBP_FORMATION_OF_PRIMARY_GERM_LAYER	70	0.608364	2.08062	0	0.000506589	0.029	1186	tags=41%, list=11%, signal=46%
GOBP_CELL_CELL_ADHESION_VIA_PLASMA_MEMBRANE_ADHESION_MOLECULES	87	0.575789	2.07823	0	0.00051551	0.03	1520	tags=45%, list=14%, signal=52%
GOBP_CELLULAR_RESPONSE_TO_ACID_CHEMICAL	48	0.652541	2.07745	0	0.000507929	0.03	1040	tags=29%, list=10%, signal=32%
GOBP_REGULATION_OF_LEUKOCYTE_DEGRANULATION	21	0.764871	2.0692	0	0.000645763	0.039	792	tags=38%, list=7%, signal=41%
GOCC_CELL_SURFACE	323	0.501868	2.06876	0	0.0006524	0.04	1411	tags=36%, list=13%, signal=40%
GOBP_HUMORAL_IMMUNE_RESPONSE	59	0.611626	2.06581	0	0.000674492	0.042	980	tags=36%, list=9%, signal=39%
GOBP_CELL_SUBSTRATE_ADHESION	234	0.508718	2.06256	0	0.000742561	0.046	1686	tags=41%, list=16%, signal=47%
GOBP_COLLAGEN_CATABOLIC_PROCESS	21	0.762824	2.0565	0	0.000868994	0.055	1367	tags=67%, list=13%, signal=76%
GOBP_HORMONE_METABOLIC_PROCESS	73	0.592768	2.05634	0	0.000857251	0.055	2464	tags=59%, list=23%, signal=76%
GOCC_ENDOCYTIC_VESICLE	193	0.520033	2.05564	0	0.000845821	0.055	2788	tags=51%, list=26%, signal=68%
GOBP_CHONDROCYTE_DIFFERENTIATION	63	0.604746	2.05376	0	0.000893513	0.059	1404	tags=41%, list=13%, signal=47%
GOBP_INFLAMMATORY_RESPONSE	302	0.492254	2.04363	0	0.00106864	0.072	1492	tags=32%, list=14%, signal=36%
GOBP_TRANSMEMBRANE_RECEPTOR_PROTEIN_SERINE_THREONINE_KINASE_SIGNALING_PATHWAY	216	0.510773	2.04195	0	0.00108287	0.074	1404	tags=31%, list=13%, signal=36%
GOCC_MEMBRANE_MICRODOMAIN	185	0.514093	2.03677	0	0.00128001	0.088	1105	tags=29%, list=10%, signal=32%
GOBP_OSSIFICATION	241	0.500247	2.03669	0	0.00126401	0.088	1676	tags=33%, list=16%, signal=38%
GOBP_DECIDUALIZATION	12	0.850101	2.0362	0	0.00124841	0.088	812	tags=58%, list=8%, signal=63%
GOBP_NEGATIVE_REGULATION_OF_LOCOMOTION	185	0.515017	2.03567	0	0.00124669	0.089	1392	tags=33%, list=13%, signal=37%
GOBP_ENDOTHELIAL_CELL_MIGRATION	151	0.532308	2.03343	0	0.00127176	0.092	1738	tags=42%, list=16%, signal=49%
GOBP_TERPENOID_METABOLIC_PROCESS	46	0.628024	2.03333	0	0.00125662	0.092	877	tags=33%, list=8%, signal=35%
GOBP_POSITIVE_REGULATION_OF_CELL_SUBSTRATE_ADHESION	80	0.571132	2.03205	0	0.00132012	0.097	1445	tags=40%, list=14%, signal=46%
GOBP_RESPONSE_TO_ACID_CHEMICAL	77	0.577448	2.03192	0	0.00130477	0.097	1040	tags=27%, list=10%, signal=30%
GOBP_RESPIRATORY_SYSTEM_DEVELOPMENT	118	0.551866	2.03138	0	0.00130256	0.098	1103	tags=35%, list=10%, signal=38%
GOBP_CELL_MATRIX_ADHESION	147	0.52798	2.0307	0	0.0013006	0.099	1496	tags=40%, list=14%, signal=46%
GOBP_POSITIVE_REGULATION_OF_SMOOTH_MUSCLE_CELL_MIGRATION	27	0.710115	2.0299	0	0.00129858	0.1	854	tags=44%, list=8%, signal=48%
GOBP_EPITHELIAL_CELL_PROLIFERATION	218	0.504574	2.02542	0	0.00140685	0.109	1478	tags=34%, list=14%, signal=39%
GOBP_INTEGRIN_MEDIATED_SIGNALING_PATHWAY	68	0.592621	2.02287	0	0.00146503	0.114	1170	tags=44%, list=11%, signal=49%
GOBP_GASTRULATION	112	0.539443	2.01919	0	0.00156905	0.123	1186	tags=31%, list=11%, signal=35%
GOBP_POSITIVE_REGULATION_OF_VASCULATURE_DEVELOPMENT	89	0.572733	2.01919	0	0.00155218	0.123	1170	tags=40%, list=11%, signal=45%
GOBP_REGULATION_OF_CELL_SUBSTRATE_ADHESION	146	0.524017	2.01414	0	0.00160625	0.128	1496	tags=38%, list=14%, signal=44%
GOBP_POSITIVE_REGULATION_OF_INFLAMMATORY_RESPONSE	52	0.625529	2.01255	0	0.00165979	0.132	2362	tags=50%, list=22%, signal=64%
GOBP_MULTI_MULTICELLULAR_ORGANISM_PROCESS	100	0.551471	2.01033	0	0.00167754	0.134	1305	tags=40%, list=12%, signal=45%
GOBP_ALPHA_BETA_T_CELL_ACTIVATION	59	0.604629	2.00838	0	0.0016947	0.137	1309	tags=42%, list=12%, signal=48%
GOBP_NEGATIVE_REGULATION_OF_REACTIVE_OXYGEN_SPECIES_BIOSYNTHETIC_PROCESS	19	0.753839	2.00794	0	0.00168897	0.138	1131	tags=37%, list=11%, signal=41%
GOBP_REGULATION_OF_EPITHELIAL_CELL_MIGRATION	164	0.519215	2.00646	0	0.00171681	0.142	1738	tags=39%, list=16%, signal=46%
GOBP_CIRCULATORY_SYSTEM_PROCESS	265	0.485651	2.00139	0	0.00184476	0.153	1686	tags=35%, list=16%, signal=41%
GOBP_NEGATIVE_REGULATION_OF_SMOOTH_MUSCLE_CELL_MIGRATION	15	0.773553	2.00047	0	0.0018265	0.153	1570	tags=67%, list=15%, signal=78%
GOBP_NEGATIVE_REGULATION_OF_COAGULATION	21	0.734984	1.99686	0	0.00195046	0.165	1235	tags=52%, list=12%, signal=59%
GOBP_SKELETAL_SYSTEM_DEVELOPMENT	274	0.482989	1.99605	0	0.00197442	0.169	1984	tags=35%, list=19%, signal=42%
GOBP_REGULATION_OF_MAST_CELL_ACTIVATION_INVOLVED_IN_IMMUNE_RESPONSE	16	0.778926	1.99238	0	0.00208351	0.178	792	tags=38%, list=7%, signal=40%
GOBP_REGULATION_OF_HORMONE_LEVELS	215	0.494115	1.98963	0	0.00214868	0.185	1838	tags=35%, list=17%, signal=41%
GOMF_ENDOPEPTIDASE_REGULATOR_ACTIVITY	74	0.575936	1.98859	0	0.00218063	0.189	839	tags=27%, list=8%, signal=29%
GOBP_REGULATION_OF_METALLOPEPTIDASE_ACTIVITY	11	0.831731	1.98842	0	0.00218136	0.191	630	tags=64%, list=6%, signal=68%
GOBP_PLATELET_AGGREGATION	37	0.653049	1.98548	0	0.00227497	0.201	1426	tags=43%, list=13%, signal=50%
GOBP_METANEPHROS_DEVELOPMENT	42	0.628875	1.98364	0	0.00237546	0.211	1666	tags=43%, list=16%, signal=51%
GOBP_POSITIVE_REGULATION_OF_LOCOMOTION	334	0.477406	1.98219	0	0.00240409	0.216	1782	tags=37%, list=17%, signal=43%
GOBP_REGULATION_OF_CELL_SHAPE	110	0.535983	1.9817	0	0.00241256	0.219	2081	tags=47%, list=20%, signal=58%
GOBP_REGULATION_OF_BODY_FLUID_LEVELS	265	0.483303	1.98003	0	0.00247031	0.227	1426	tags=28%, list=13%, signal=32%
GOBP_KIDNEY_MORPHOGENESIS	44	0.630217	1.97995	0	0.00245815	0.228	686	tags=32%, list=6%, signal=34%
GOCC_PHAGOCYTIC_VESICLE	98	0.542322	1.97962	0	0.00244626	0.229	2788	tags=53%, list=26%, signal=71%
GOCC_LUMENAL_SIDE_OF_ENDOPLASMIC_RETICULUM_MEMBRANE	15	0.789911	1.97492	0	0.00267593	0.25	1305	tags=53%, list=12%, signal=61%
GOBP_OUTFLOW_TRACT_SEPTUM_MORPHOGENESIS	16	0.774152	1.97401	0	0.00270064	0.255	1404	tags=75%, list=13%, signal=86%
GOBP_ENDODERMAL_CELL_DIFFERENTIATION	30	0.66056	1.97311	0.0017331	0.00274401	0.261	828	tags=43%, list=8%, signal=47%
GOBP_REGULATION_OF_COAGULATION	35	0.648235	1.96806	0	0.00301177	0.286	1333	tags=43%, list=13%, signal=49%
GOBP_RESPONSE_TO_INTERFERON_GAMMA	104	0.53666	1.96795	0	0.00298646	0.286	1549	tags=39%, list=15%, signal=46%
GOBP_TISSUE_MIGRATION	209	0.493763	1.96625	0	0.00309227	0.293	1738	tags=37%, list=16%, signal=44%
GOBP_BRANCHING_MORPHOGENESIS_OF_AN_EPITHELIAL_TUBE	81	0.547876	1.96494	0	0.00317685	0.301	688	tags=27%, list=6%, signal=29%
GOBP_POSITIVE_REGULATION_OF_COLLAGEN_METABOLIC_PROCESS	18	0.747138	1.96336	0	0.00324202	0.306	1404	tags=72%, list=13%, signal=83%
GOBP_LEUKOCYTE_MIGRATION	190	0.495348	1.96266	0	0.00326969	0.311	1792	tags=38%, list=17%, signal=45%
GOBP_PHAGOCYTOSIS	156	0.505725	1.96226	0	0.00328811	0.315	2570	tags=44%, list=24%, signal=58%
GOBP_POSITIVE_REGULATION_OF_LEUKOCYTE_CELL_CELL_ADHESION	103	0.537693	1.95784	0	0.00359092	0.341	1141	tags=31%, list=11%, signal=34%
GOBP_REGULATION_OF_NITRIC_OXIDE_METABOLIC_PROCESS	36	0.638147	1.95475	0	0.00367763	0.349	1474	tags=39%, list=14%, signal=45%
GOBP_ENDODERM_FORMATION	34	0.65095	1.9524	0.00168067	0.00378878	0.363	879	tags=41%, list=8%, signal=45%
GOBP_LEUKOCYTE_CELL_CELL_ADHESION	161	0.501881	1.9514	0	0.00382894	0.369	1404	tags=33%, list=13%, signal=37%
GOBP_BONE_DEVELOPMENT	119	0.522368	1.95058	0	0.00385117	0.374	2280	tags=43%, list=21%, signal=54%
GOCC_ACTIN_CYTOSKELETON	328	0.468919	1.94957	0	0.00385583	0.375	2532	tags=47%, list=24%, signal=60%
GOBP_REGULATION_OF_RESPONSE_TO_WOUNDING	86	0.552771	1.94819	0	0.00398846	0.388	1161	tags=30%, list=11%, signal=34%
GOMF_PEPTIDASE_REGULATOR_ACTIVITY	102	0.535989	1.94622	0	0.00411872	0.398	883	tags=24%, list=8%, signal=25%
GOBP_POSITIVE_REGULATION_OF_CELL_MATRIX_ADHESION	35	0.636039	1.94608	0.00170358	0.00408775	0.398	1445	tags=43%, list=14%, signal=49%
GOBP_ENDOTHELIAL_CELL_PROLIFERATION	83	0.548867	1.94607	0.00155763	0.00405725	0.398	1118	tags=35%, list=11%, signal=39%
GOBP_AMEBOIDAL_TYPE_CELL_MIGRATION	281	0.472026	1.94412	0	0.00421613	0.409	1404	tags=32%, list=13%, signal=36%
GOBP_REGULATION_OF_CELL_CELL_ADHESION	206	0.478941	1.94382	0	0.00420144	0.41	1404	tags=31%, list=13%, signal=35%
GOCC_CAVEOLA	51	0.598489	1.942	0	0.00429234	0.421	981	tags=31%, list=9%, signal=34%
GOBP_CELLULAR_HORMONE_METABOLIC_PROCESS	47	0.611614	1.94102	0	0.00433376	0.427	2038	tags=49%, list=19%, signal=60%
GOBP_CELLULAR_RESPONSE_TO_VASCULAR_ENDOTHELIAL_GROWTH_FACTOR_STIMULUS	43	0.614465	1.94062	0	0.00432658	0.428	1069	tags=40%, list=10%, signal=44%
GOBP_SMOOTH_MUSCLE_CELL_PROLIFERATION	77	0.552725	1.93913	0	0.00443852	0.438	1720	tags=35%, list=16%, signal=42%
GOBP_CELLULAR_RESPONSE_TO_NUTRIENT	26	0.679076	1.93904	0	0.00440704	0.438	812	tags=35%, list=8%, signal=37%
GOBP_PANCREAS_DEVELOPMENT	33	0.644423	1.9386	0	0.00441521	0.441	1532	tags=36%, list=14%, signal=42%
GOBP_MESONEPHROS_DEVELOPMENT	50	0.590934	1.93812	0	0.00440737	0.444	546	tags=30%, list=5%, signal=31%
GOBP_REGULATION_OF_TUBE_SIZE	54	0.586047	1.93738	0	0.00446882	0.45	1323	tags=39%, list=12%, signal=44%
GOBP_GLUCOCORTICOID_METABOLIC_PROCESS	11	0.827298	1.93688	0	0.00445323	0.452	363	tags=36%, list=3%, signal=38%
GOMF_CORECEPTOR_ACTIVITY	22	0.698616	1.93633	0	0.00447586	0.456	962	tags=55%, list=9%, signal=60%
GOBP_MEMBRANE_PROTEIN_PROTEOLYSIS	44	0.611726	1.93403	0	0.00463397	0.464	1418	tags=36%, list=13%, signal=42%
GOBP_NEGATIVE_REGULATION_OF_CELLULAR_RESPONSE_TO_GROWTH_FACTOR_STIMULUS	57	0.583995	1.93317	0	0.00464764	0.469	1312	tags=40%, list=12%, signal=46%
GOMF_CALCIUM_ION_BINDING	277	0.468346	1.93146	0	0.00474282	0.476	1830	tags=39%, list=17%, signal=46%
GOBP_NEGATIVE_REGULATION_OF_ERK1_AND_ERK2_CASCADE	48	0.601979	1.93062	0	0.00473352	0.479	1176	tags=38%, list=11%, signal=42%
GOBP_CELL_JUNCTION_ASSEMBLY	230	0.473185	1.92843	0	0.00481984	0.489	1493	tags=32%, list=14%, signal=37%
GOBP_POSITIVE_REGULATION_OF_CELL_JUNCTION_ASSEMBLY	44	0.619401	1.92713	0	0.00489048	0.498	1402	tags=36%, list=13%, signal=42%
GOBP_MATERNAL_PROCESS_INVOLVED_IN_FEMALE_PREGNANCY	31	0.662404	1.92632	0	0.00498214	0.507	1095	tags=39%, list=10%, signal=43%
GOBP_PROTEIN_LOCALIZATION_TO_PLASMA_MEMBRANE	202	0.483287	1.92453	0	0.00509392	0.52	2705	tags=45%, list=25%, signal=59%
GOMF_PLATELET_DERIVED_GROWTH_FACTOR_RECEPTOR_BINDING	12	0.799576	1.92385	0	0.00513994	0.524	501	tags=58%, list=5%, signal=61%
GOCC_MICROVILLUS	46	0.602508	1.92324	0	0.0051424	0.526	1686	tags=46%, list=16%, signal=54%
GOBP_RESPONSE_TO_FIBROBLAST_GROWTH_FACTOR	86	0.539792	1.92228	0	0.00520195	0.534	1185	tags=24%, list=11%, signal=27%
GOBP_REGULATION_OF_VESICLE_MEDIATED_TRANSPORT	312	0.458254	1.92208	0	0.00520441	0.535	2523	tags=38%, list=24%, signal=48%
GOBP_PLATELET_ACTIVATION	86	0.542186	1.92184	0	0.00519955	0.536	1751	tags=33%, list=16%, signal=39%
GOBP_REGULATION_OF_VASCULAR_PERMEABILITY	22	0.708002	1.92182	0	0.00516706	0.536	1686	tags=59%, list=16%, signal=70%
GOBP_POSITIVE_REGULATION_OF_FOCAL_ADHESION_ASSEMBLY	20	0.724538	1.92029	0.0017762	0.00523152	0.543	1392	tags=50%, list=13%, signal=57%
GOBP_MULTICELLULAR_ORGANISMAL_RESPONSE_TO_STRESS	23	0.694933	1.92016	0.00178571	0.00521974	0.543	1118	tags=35%, list=11%, signal=39%
GOBP_TRANSFORMING_GROWTH_FACTOR_BETA_PRODUCTION	24	0.686558	1.91852	0	0.00531071	0.553	1118	tags=42%, list=11%, signal=46%
GOBP_POSITIVE_REGULATION_OF_CELL_MIGRATION_INVOLVED_IN_SPROUTING_ANGIOGENESIS	15	0.759847	1.91684	0	0.00544745	0.564	1478	tags=60%, list=14%, signal=70%
GOMF_FIBRONECTIN_BINDING	19	0.745513	1.91605	0	0.00546183	0.568	1808	tags=79%, list=17%, signal=95%
GOBP_REGULATION_OF_MACROPHAGE_ACTIVATION	24	0.681689	1.916	0.00344828	0.00544246	0.569	1161	tags=50%, list=11%, signal=56%
GOCC_RECEPTOR_COMPLEX	161	0.487527	1.91379	0	0.00563611	0.585	1196	tags=34%, list=11%, signal=37%
GOBP_MORPHOGENESIS_OF_A_BRANCHING_STRUCTURE	100	0.525364	1.91357	0	0.00562261	0.586	775	tags=26%, list=7%, signal=28%
GOBP_UROGENITAL_SYSTEM_DEVELOPMENT	185	0.481033	1.91318	0	0.00560916	0.588	1686	tags=34%, list=16%, signal=40%
GOBP_NEGATIVE_REGULATION_OF_NITRIC_OXIDE_METABOLIC_PROCESS	11	0.836324	1.91257	0	0.00566057	0.596	1131	tags=55%, list=11%, signal=61%
GOCC_ACTIN_FILAMENT	72	0.549303	1.91187	0	0.00571228	0.603	1756	tags=49%, list=17%, signal=58%
GOBP_RECEPTOR_MEDIATED_ENDOCYTOSIS	158	0.49532	1.91184	0	0.00569201	0.605	2426	tags=44%, list=23%, signal=56%
GOBP_FEAR_RESPONSE	15	0.755784	1.90957	0	0.00588431	0.616	685	tags=33%, list=6%, signal=36%
GOBP_VASCULAR_ENDOTHELIAL_GROWTH_FACTOR_RECEPTOR_SIGNALING_PATHWAY	65	0.56566	1.90825	0	0.00599153	0.62	2381	tags=48%, list=22%, signal=61%
GOBP_REGULATION_OF_PHOSPHATIDYLINOSITOL_3_KINASE_SIGNALING	76	0.545071	1.90777	0	0.0060778	0.624	1686	tags=36%, list=16%, signal=42%
GOBP_BODY_MORPHOGENESIS	35	0.631309	1.90644	0	0.00619491	0.632	2151	tags=54%, list=20%, signal=68%
GOBP_LUNG_ALVEOLUS_DEVELOPMENT	25	0.693875	1.90624	0	0.0061914	0.634	1648	tags=64%, list=16%, signal=76%
GOBP_ENTRY_INTO_HOST	102	0.520772	1.90579	0	0.00618788	0.638	1382	tags=31%, list=13%, signal=36%
GOBP_TAXIS	306	0.462384	1.90569	0	0.00615943	0.638	1788	tags=36%, list=17%, signal=42%
GOBP_REGULATION_OF_HOMOTYPIC_CELL_CELL_ADHESION	17	0.738393	1.90318	0	0.00644629	0.654	819	tags=47%, list=8%, signal=51%
GOBP_REGULATION_OF_BLOOD_PRESSURE	66	0.559841	1.90179	0	0.00662556	0.667	1323	tags=35%, list=12%, signal=40%
GOCC_GOLGI_LUMEN	33	0.620954	1.90126	0.00170068	0.0066441	0.671	1380	tags=45%, list=13%, signal=52%
GOBP_REGULATION_OF_PLATELET_DERIVED_GROWTH_FACTOR_RECEPTOR_SIGNALING_PATHWAY	18	0.741892	1.899	0	0.00682076	0.679	501	tags=28%, list=5%, signal=29%
GOBP_ZYMOGEN_ACTIVATION	30	0.653193	1.89606	0	0.0072005	0.706	1738	tags=50%, list=16%, signal=60%
GOBP_MESENCHYME_DEVELOPMENT	171	0.487582	1.89569	0	0.00722736	0.71	1404	tags=35%, list=13%, signal=40%
GOBP_NEGATIVE_REGULATION_OF_IMMUNE_RESPONSE	72	0.54395	1.89499	0	0.00730152	0.715	1403	tags=35%, list=13%, signal=40%
GOBP_ALPHA_BETA_T_CELL_DIFFERENTIATION	46	0.5885	1.894	0	0.00731609	0.716	1292	tags=41%, list=12%, signal=47%
GOBP_REGULATION_OF_INFLAMMATORY_RESPONSE	150	0.490926	1.89371	0	0.00731852	0.717	2032	tags=38%, list=19%, signal=46%
GOCC_CONTRACTILE_FIBER	119	0.505604	1.89125	0	0.00760298	0.734	1736	tags=42%, list=16%, signal=50%
GOBP_NEPHRON_MORPHOGENESIS	36	0.617224	1.89109	0	0.00756296	0.734	686	tags=31%, list=6%, signal=33%
GOBP_OSTEOBLAST_DIFFERENTIATION	139	0.499844	1.89042	0	0.00766825	0.741	1676	tags=34%, list=16%, signal=40%
GOBP_RENAL_SYSTEM_PROCESS	50	0.585792	1.88971	0	0.00769791	0.744	1404	tags=42%, list=13%, signal=48%
GOBP_POSITIVE_REGULATION_OF_CELL_SUBSTRATE_JUNCTION_ORGANIZATION	25	0.669848	1.88785	0	0.00784784	0.753	1392	tags=44%, list=13%, signal=51%
GOBP_PLATELET_DERIVED_GROWTH_FACTOR_RECEPTOR_SIGNALING_PATHWAY	45	0.602391	1.8873	0.00160514	0.00786467	0.757	1984	tags=40%, list=19%, signal=49%
GOBP_SYNCYTIUM_FORMATION	29	0.658785	1.88713	0	0.00784155	0.757	1492	tags=52%, list=14%, signal=60%
GOBP_LYMPHOCYTE_COSTIMULATION	25	0.665979	1.88689	0	0.00780721	0.757	980	tags=36%, list=9%, signal=40%
GOBP_POSITIVE_REGULATION_OF_SMOOTH_MUSCLE_CELL_PROLIFERATION	49	0.587546	1.88678	0	0.00778448	0.759	2504	tags=53%, list=24%, signal=69%
GOBP_REGULATION_OF_EXTRACELLULAR_MATRIX_DISASSEMBLY	13	0.778071	1.88668	0.00181159	0.00776741	0.761	722	tags=46%, list=7%, signal=49%
GOBP_RESPONSE_TO_NUTRIENT	98	0.520832	1.88603	0.00142653	0.00780104	0.764	1272	tags=33%, list=12%, signal=37%
GOBP_REGULATION_OF_CD4_POSITIVE_ALPHA_BETA_T_CELL_ACTIVATION	27	0.674478	1.88577	0	0.00780091	0.765	1292	tags=52%, list=12%, signal=59%
GOBP_REACTIVE_OXYGEN_SPECIES_BIOSYNTHETIC_PROCESS	65	0.555299	1.88562	0.00160514	0.00778406	0.767	1474	tags=29%, list=14%, signal=34%
GOMF_IRON_ION_BINDING	65	0.562704	1.88549	0	0.00775658	0.767	1713	tags=31%, list=16%, signal=36%
GOMF_SERINE_TYPE_ENDOPEPTIDASE_INHIBITOR_ACTIVITY	28	0.659831	1.88353	0	0.00793696	0.778	839	tags=39%, list=8%, signal=43%
GOBP_MUSCLE_CONTRACTION	148	0.489389	1.8835	0	0.00789805	0.778	1363	tags=33%, list=13%, signal=37%
GOBP_MACROPHAGE_ACTIVATION	39	0.61549	1.88302	0	0.00790833	0.778	1492	tags=46%, list=14%, signal=54%
GOBP_PROTEIN_HYDROXYLATION	25	0.669756	1.883	0	0.00786994	0.778	1786	tags=52%, list=17%, signal=62%
GOBP_INTERFERON_GAMMA_MEDIATED_SIGNALING_PATHWAY	56	0.570772	1.88215	0	0.00793926	0.786	1383	tags=39%, list=13%, signal=45%
GOBP_MYOBLAST_FUSION	21	0.706341	1.88135	0	0.00807771	0.792	1268	tags=57%, list=12%, signal=65%
GOBP_POSITIVE_REGULATION_OF_CYTOKINE_PRODUCTION	211	0.46772	1.87929	0	0.00834761	0.81	1418	tags=27%, list=13%, signal=31%
GOBP_NEGATIVE_REGULATION_OF_RESPONSE_TO_WOUNDING	40	0.602699	1.87811	0	0.00844018	0.813	258	tags=23%, list=2%, signal=23%
GOBP_POSITIVE_REGULATION_OF_T_CELL_PROLIFERATION	35	0.623954	1.87686	0.00165017	0.00856905	0.819	1141	tags=34%, list=11%, signal=38%
GOBP_RESPONSE_TO_BMP	89	0.52145	1.87617	0	0.00862289	0.823	1404	tags=37%, list=13%, signal=42%
GOCC_VESICLE_LUMEN	206	0.467161	1.87579	0	0.00861881	0.826	2016	tags=33%, list=19%, signal=40%
GOBP_EMBRYONIC_DIGESTIVE_TRACT_DEVELOPMENT	17	0.729016	1.87558	0	0.00862544	0.827	570	tags=47%, list=5%, signal=50%
GOMF_TRANSMEMBRANE_RECEPTOR_PROTEIN_TYROSINE_KINASE_ACTIVITY	29	0.64262	1.8726	0.0017094	0.0089422	0.835	2084	tags=52%, list=20%, signal=64%
GOBP_NEGATIVE_REGULATION_OF_CELL_ADHESION	153	0.48517	1.87239	0	0.008957	0.838	1526	tags=35%, list=14%, signal=40%
GOBP_COLLAGEN_ACTIVATED_SIGNALING_PATHWAY	10	0.825465	1.8718	0	0.00896195	0.838	496	tags=50%, list=5%, signal=52%
GOBP_ARTERY_DEVELOPMENT	56	0.566398	1.87174	0.00155039	0.00893108	0.839	1478	tags=48%, list=14%, signal=56%
GOBP_TYPE_B_PANCREATIC_CELL_PROLIFERATION	14	0.762234	1.87171	0	0.00889537	0.839	854	tags=50%, list=8%, signal=54%
GOBP_MUSCLE_CELL_DIFFERENTIATION	197	0.472773	1.87	0	0.00918352	0.848	1605	tags=32%, list=15%, signal=37%
GOBP_HETEROTYPIC_CELL_CELL_ADHESION	27	0.642442	1.86857	0.00169779	0.00929297	0.853	1282	tags=56%, list=12%, signal=63%
GOMF_PEPTIDE_ANTIGEN_BINDING	13	0.774897	1.86631	0	0.00966101	0.862	897	tags=62%, list=8%, signal=67%
GOCC_CELL_PROJECTION_MEMBRANE	184	0.475418	1.86585	0	0.00969732	0.866	2556	tags=51%, list=24%, signal=65%
GOMF_METALLOPEPTIDASE_ACTIVITY	92	0.51963	1.86581	0	0.00967373	0.866	1949	tags=37%, list=18%, signal=45%
GOCC_BASAL_PART_OF_CELL	134	0.492294	1.8651	0	0.00972905	0.868	2551	tags=49%, list=24%, signal=64%
GOMF_SULFUR_COMPOUND_BINDING	133	0.494131	1.86491	0	0.00971563	0.87	1200	tags=29%, list=11%, signal=32%
GOCC_CLATHRIN_COATED_PIT	57	0.568916	1.86462	0.00162866	0.00973158	0.873	2379	tags=49%, list=22%, signal=63%
GOBP_HEAD_MORPHOGENESIS	24	0.654326	1.86371	0.00170648	0.00978138	0.875	2058	tags=63%, list=19%, signal=77%
GOBP_FACE_DEVELOPMENT	34	0.625399	1.86359	0	0.00975812	0.876	2058	tags=50%, list=19%, signal=62%
GOBP_ERK1_AND_ERK2_CASCADE	146	0.488491	1.86327	0	0.00976373	0.877	1240	tags=30%, list=12%, signal=34%
GOBP_VENTRAL_SPINAL_CORD_DEVELOPMENT	16	0.744836	1.86314	0.00174825	0.00975031	0.878	1946	tags=56%, list=18%, signal=69%
GOCC_LYSOSOMAL_LUMEN	69	0.546237	1.86241	0.0015674	0.00982804	0.879	2016	tags=51%, list=19%, signal=62%
GOBP_NEGATIVE_REGULATION_OF_TRANSFORMING_GROWTH_FACTOR_BETA_RECEPTOR_SIGNALING_PATHWAY	61	0.559096	1.86153	0	0.00993341	0.887	2280	tags=51%, list=21%, signal=64%
GOBP_VASCULAR_TRANSPORT	47	0.580389	1.86139	0	0.00990035	0.887	1660	tags=45%, list=16%, signal=53%
GOBP_REGULATION_OF_EXTRACELLULAR_MATRIX_ORGANIZATION	32	0.630749	1.86047	0	0.0099952	0.893	1240	tags=47%, list=12%, signal=53%
GOBP_REGULATION_OF_CELL_MORPHOGENESIS	216	0.466002	1.85978	0	0.0100706	0.897	2427	tags=44%, list=23%, signal=56%
GOBP_ENDOCRINE_SYSTEM_DEVELOPMENT	57	0.56081	1.85886	0	0.010136	0.9	1532	tags=33%, list=14%, signal=39%
GOBP_MAST_CELL_ACTIVATION_INVOLVED_IN_IMMUNE_RESPONSE	20	0.710837	1.85779	0	0.0102337	0.903	792	tags=35%, list=7%, signal=38%
GOBP_REGULATION_OF_PEPTIDASE_ACTIVITY	246	0.453684	1.85759	0	0.0102187	0.903	1318	tags=24%, list=12%, signal=27%
GOBP_REGULATION_OF_REACTIVE_OXYGEN_SPECIES_BIOSYNTHETIC_PROCESS	55	0.558602	1.85703	0	0.0102874	0.905	1474	tags=29%, list=14%, signal=34%
GOBP_LIPID_EXPORT_FROM_CELL	29	0.633739	1.85659	0.00163399	0.0102954	0.905	1660	tags=48%, list=16%, signal=57%
GOCC_EXTERNAL_SIDE_OF_PLASMA_MEMBRANE	98	0.513093	1.85646	0	0.0102666	0.905	1563	tags=42%, list=15%, signal=49%
GOBP_VASCULOGENESIS	47	0.593702	1.85506	0	0.0103886	0.907	1929	tags=53%, list=18%, signal=65%
GOBP_SMOOTH_MUSCLE_CELL_DIFFERENTIATION	38	0.609195	1.85506	0.00346021	0.010346	0.907	1005	tags=34%, list=9%, signal=38%
GOMF_METAL_ION_TRANSMEMBRANE_TRANSPORTER_ACTIVITY	140	0.482445	1.85399	0	0.0105071	0.911	1743	tags=35%, list=16%, signal=41%
GOBP_RESPONSE_TO_AMYLOID_BETA	21	0.684225	1.85393	0.00166113	0.0104736	0.911	747	tags=38%, list=7%, signal=41%
GOBP_REGULATION_OF_THE_FORCE_OF_HEART_CONTRACTION	12	0.782814	1.85203	0.00359066	0.0106656	0.916	1363	tags=58%, list=13%, signal=67%
GOBP_CELL_SUBSTRATE_JUNCTION_ORGANIZATION	88	0.515954	1.85138	0	0.0107126	0.92	1493	tags=38%, list=14%, signal=43%
GOBP_ODONTOGENESIS	59	0.553249	1.85058	0	0.0107813	0.921	1404	tags=36%, list=13%, signal=41%
GOBP_REGULATION_OF_LEUKOCYTE_MIGRATION	91	0.513857	1.8486	0	0.01108	0.926	1428	tags=35%, list=13%, signal=40%
GOMF_EXOGENOUS_PROTEIN_BINDING	45	0.586997	1.84797	0	0.0111688	0.929	1382	tags=38%, list=13%, signal=43%
GOCC_ACTIN_FILAMENT_BUNDLE	52	0.571683	1.84771	0	0.0111638	0.929	1736	tags=52%, list=16%, signal=62%
GOBP_HEART_DEVELOPMENT	335	0.440456	1.84734	0	0.0111814	0.93	1666	tags=33%, list=16%, signal=37%
GOBP_EPHRIN_RECEPTOR_SIGNALING_PATHWAY	65	0.53932	1.84652	0	0.0112684	0.933	1885	tags=42%, list=18%, signal=50%
GOMF_CELL_ADHESION_MEDIATOR_ACTIVITY	38	0.599701	1.8465	0	0.0112286	0.933	1831	tags=55%, list=17%, signal=67%
GOBP_MAMMARY_GLAND_EPITHELIAL_CELL_DIFFERENTIATION	11	0.772424	1.84554	0	0.0113276	0.935	1015	tags=45%, list=10%, signal=50%
GOBP_TUMOR_NECROSIS_FACTOR_SUPERFAMILY_CYTOKINE_PRODUCTION	65	0.541824	1.84434	0.00158228	0.0114736	0.935	1237	tags=34%, list=12%, signal=38%
GOCC_VACUOLAR_MEMBRANE	332	0.439081	1.84431	0	0.0114335	0.935	3205	tags=51%, list=30%, signal=71%
GOBP_REGULATION_OF_CHONDROCYTE_DIFFERENTIATION	32	0.627641	1.8432	0	0.011599	0.937	1404	tags=47%, list=13%, signal=54%
GOBP_REACTIVE_NITROGEN_SPECIES_METABOLIC_PROCESS	44	0.584874	1.842	0	0.011738	0.939	1474	tags=36%, list=14%, signal=42%
GOBP_FOCAL_ADHESION_ASSEMBLY	68	0.539886	1.84109	0.00160772	0.011838	0.94	1493	tags=38%, list=14%, signal=44%
GOBP_RESPONSE_TO_CORTICOSTEROID	79	0.521898	1.84071	0	0.011848	0.94	1060	tags=33%, list=10%, signal=36%
GOBP_RESPONSE_TO_FLUID_SHEAR_STRESS	25	0.65769	1.84038	0	0.0118281	0.94	1333	tags=52%, list=13%, signal=59%
GOBP_NEURON_PROJECTION_GUIDANCE	155	0.472722	1.83858	0	0.0120992	0.943	1570	tags=35%, list=15%, signal=41%
GOMF_MOLECULAR_TRANSDUCER_ACTIVITY	286	0.44655	1.83803	0	0.0121794	0.945	1439	tags=31%, list=14%, signal=35%
GOBP_REGULATION_OF_HORMONE_METABOLIC_PROCESS	17	0.718795	1.83734	0	0.0122631	0.946	2217	tags=71%, list=21%, signal=89%
GOBP_T_HELPER_1_TYPE_IMMUNE_RESPONSE	20	0.66864	1.8335	0	0.0129001	0.959	1631	tags=45%, list=15%, signal=53%
GOMF_TRANSMEMBRANE_RECEPTOR_PROTEIN_KINASE_ACTIVITY	41	0.585579	1.83305	0.00165837	0.0129472	0.959	2084	tags=51%, list=20%, signal=63%
GOBP_REGULATION_OF_BONE_MINERALIZATION	39	0.587692	1.83265	0.00165563	0.0129528	0.959	1470	tags=49%, list=14%, signal=56%
GOCC_ENDOCYTIC_VESICLE_MEMBRANE	100	0.499595	1.83219	0	0.0130202	0.959	2788	tags=51%, list=26%, signal=69%
GOBP_SENSORY_SYSTEM_DEVELOPMENT	182	0.463275	1.83203	0	0.0130049	0.959	1968	tags=34%, list=19%, signal=40%
GOBP_REGULATION_OF_TRANSMEMBRANE_RECEPTOR_PROTEIN_SERINE_THREONINE_KINASE_SIGNALING_PATHWAY	149	0.482768	1.83191	0	0.0129896	0.959	1404	tags=34%, list=13%, signal=39%
GOCC_MICROFIBRIL	10	0.811238	1.83188	0	0.0129542	0.959	1319	tags=60%, list=12%, signal=68%
GOBP_KIDNEY_MESENCHYME_DEVELOPMENT	12	0.799771	1.83159	0	0.012927	0.959	546	tags=42%, list=5%, signal=44%
GOCC_ANCHORED_COMPONENT_OF_MEMBRANE	45	0.578599	1.83137	0	0.0129123	0.959	832	tags=29%, list=8%, signal=31%
GOBP_PHOSPHATIDYLINOSITOL_3_KINASE_SIGNALING	89	0.513377	1.83065	0	0.0130061	0.96	1686	tags=34%, list=16%, signal=40%
GOCC_ENDOLYSOSOME	17	0.71047	1.83064	0.00545455	0.0129672	0.96	2275	tags=82%, list=21%, signal=105%
GOBP_REGULATION_OF_FIBROBLAST_GROWTH_FACTOR_RECEPTOR_SIGNALING_PATHWAY	17	0.711058	1.83059	0.00346021	0.0129446	0.96	1118	tags=47%, list=11%, signal=53%
GOBP_MYELOID_LEUKOCYTE_MIGRATION	81	0.518764	1.83036	0	0.012946	0.96	1865	tags=46%, list=18%, signal=55%
GOBP_REGULATION_OF_MYELOID_LEUKOCYTE_MEDIATED_IMMUNITY	25	0.649902	1.82914	0	0.0131697	0.963	792	tags=32%, list=7%, signal=34%
GOBP_ISOPRENOID_METABOLIC_PROCESS	61	0.544518	1.82831	0	0.0132811	0.965	877	tags=25%, list=8%, signal=27%
GOBP_CHEMOKINE_PRODUCTION	41	0.581838	1.82789	0	0.013313	0.966	1631	tags=39%, list=15%, signal=46%
GOCC_LEADING_EDGE_MEMBRANE	106	0.498931	1.82756	0	0.0133096	0.966	2556	tags=57%, list=24%, signal=74%
GOBP_POSITIVE_REGULATION_OF_TRANSFORMING_GROWTH_FACTOR_BETA_PRODUCTION	11	0.777611	1.82439	0.00371058	0.0139072	0.972	1118	tags=45%, list=11%, signal=51%
GOBP_MONOCARBOXYLIC_ACID_TRANSPORT	66	0.531205	1.82436	0	0.0138584	0.972	2094	tags=45%, list=20%, signal=56%
GOMF_EXTRACELLULAR_MATRIX_BINDING	32	0.611872	1.82394	0	0.0138799	0.973	1118	tags=47%, list=11%, signal=52%
GOBP_REGULATION_OF_PLATELET_AGGREGATION	11	0.791448	1.82315	0.00184843	0.0139473	0.974	380	tags=36%, list=4%, signal=38%
GOBP_SPINAL_CORD_MOTOR_NEURON_DIFFERENTIATION	12	0.767055	1.82287	0.00184162	0.0139221	0.974	1749	tags=58%, list=16%, signal=70%
GOBP_ANIMAL_ORGAN_FORMATION	30	0.634155	1.82256	0	0.0139698	0.975	556	tags=33%, list=5%, signal=35%
GOBP_POSITIVE_REGULATION_OF_EXTRACELLULAR_MATRIX_ORGANIZATION	19	0.691063	1.8225	0	0.013937	0.975	732	tags=37%, list=7%, signal=39%
GOBP_CELL_ADHESION_MEDIATED_BY_INTEGRIN	43	0.587346	1.82219	0.00158983	0.0139615	0.975	1282	tags=42%, list=12%, signal=47%
GOBP_MICROGLIAL_CELL_ACTIVATION	13	0.738858	1.82053	0	0.0142106	0.977	1161	tags=54%, list=11%, signal=60%
GOMF_OXIDOREDUCTASE_ACTIVITY_ACTING_ON_PAIRED_DONORS_WITH_INCORPORATION_OR_REDUCTION_OF_MOLECULAR_OXYGEN	78	0.520465	1.8202	0	0.0142381	0.977	1713	tags=33%, list=16%, signal=39%
GOCC_CELL_LEADING_EDGE	301	0.434156	1.81912	0	0.0143754	0.977	2556	tags=46%, list=24%, signal=59%
GOBP_RHO_PROTEIN_SIGNAL_TRANSDUCTION	87	0.509116	1.81868	0	0.0144171	0.977	1895	tags=40%, list=18%, signal=49%
GOBP_POSITIVE_REGULATION_OF_PROTEIN_KINASE_B_SIGNALING	78	0.527723	1.81857	0	0.0143947	0.977	1884	tags=38%, list=18%, signal=46%
GOBP_REGULATION_OF_CARTILAGE_DEVELOPMENT	39	0.593571	1.81822	0.00164745	0.0144171	0.977	1404	tags=44%, list=13%, signal=50%
GOBP_MATERNAL_PLACENTA_DEVELOPMENT	18	0.690309	1.8171	0.00170648	0.0146749	0.978	981	tags=44%, list=9%, signal=49%
GOBP_LENS_DEVELOPMENT_IN_CAMERA_TYPE_EYE	39	0.586203	1.81704	0.0016129	0.0146371	0.978	2257	tags=46%, list=21%, signal=58%
GOCC_COATED_VESICLE_MEMBRANE	120	0.481087	1.81699	0	0.0146032	0.978	2845	tags=47%, list=27%, signal=63%
GOCC_RECYCLING_ENDOSOME_MEMBRANE	71	0.532608	1.81659	0	0.0146466	0.979	1860	tags=37%, list=18%, signal=44%
GOBP_SKELETAL_SYSTEM_MORPHOGENESIS	118	0.491592	1.81588	0	0.0147784	0.979	2081	tags=36%, list=20%, signal=45%
GOBP_CARDIAC_CHAMBER_MORPHOGENESIS	63	0.526243	1.81519	0	0.0148764	0.981	1047	tags=41%, list=10%, signal=46%
GOBP_HORMONE_TRANSPORT	147	0.468258	1.81516	0	0.0148311	0.981	1532	tags=29%, list=14%, signal=33%
GOBP_MAST_CELL_ACTIVATION	23	0.655637	1.8148	0	0.0148664	0.983	1483	tags=39%, list=14%, signal=45%
GOBP_REGULATION_OF_HEART_RATE_BY_CARDIAC_CONDUCTION	14	0.724603	1.81479	0.0034965	0.0148214	0.983	1100	tags=50%, list=10%, signal=56%
GOBP_REGULATION_OF_T_HELPER_CELL_DIFFERENTIATION	18	0.695601	1.81474	0.00179856	0.0147803	0.983	1631	tags=56%, list=15%, signal=66%
GOBP_RESPONSE_TO_RETINOIC_ACID	54	0.555068	1.8143	0	0.0148223	0.983	971	tags=31%, list=9%, signal=34%
GOMF_PEPTIDE_BINDING	157	0.466099	1.8141	0	0.0147994	0.983	1697	tags=32%, list=16%, signal=38%
GOBP_REGULATION_OF_ENDOCYTOSIS	143	0.473028	1.81295	0	0.0149562	0.983	2445	tags=41%, list=23%, signal=52%
GOBP_POSITIVE_REGULATION_OF_ENDOCYTOSIS	70	0.523947	1.81211	0	0.0151187	0.983	2426	tags=43%, list=23%, signal=55%
GOMF_ACTIN_BINDING	274	0.44498	1.81058	0	0.0153515	0.985	2593	tags=47%, list=24%, signal=61%
GOBP_POSITIVE_REGULATION_OF_PHOSPHATIDYLINOSITOL_3_KINASE_SIGNALING	50	0.560316	1.80981	0.00315457	0.0154766	0.985	1216	tags=34%, list=11%, signal=38%
GOCC_RECYCLING_ENDOSOME	138	0.477189	1.80976	0	0.0154344	0.985	2549	tags=40%, list=24%, signal=52%
GOMF_VOLTAGE_GATED_ION_CHANNEL_ACTIVITY	48	0.553841	1.80948	0.00166389	0.015456	0.985	1726	tags=38%, list=16%, signal=45%
GOBP_POSITIVE_REGULATION_OF_INSULIN_SECRETION	36	0.599268	1.80807	0	0.015678	0.985	1446	tags=33%, list=14%, signal=38%
GOCC_PODOSOME	22	0.670687	1.80783	0.00172712	0.0156988	0.988	1247	tags=41%, list=12%, signal=46%
GOBP_MUSCLE_STRUCTURE_DEVELOPMENT	346	0.427337	1.80712	0	0.0157544	0.988	1631	tags=29%, list=15%, signal=33%
GOBP_PROTEIN_LOCALIZATION_TO_VACUOLE	60	0.541466	1.80692	0	0.0157574	0.988	2194	tags=43%, list=21%, signal=54%
GOBP_ENDODERM_DEVELOPMENT	50	0.546728	1.80666	0	0.0157707	0.988	879	tags=32%, list=8%, signal=35%
GOBP_MUSCLE_CELL_CELLULAR_HOMEOSTASIS	14	0.73813	1.80563	0.00179533	0.0159458	0.988	1524	tags=36%, list=14%, signal=42%
GOBP_ARTERY_MORPHOGENESIS	38	0.587517	1.80549	0	0.0159205	0.988	1101	tags=53%, list=10%, signal=59%
GOBP_RESPONSE_TO_VITAMIN	54	0.542944	1.80515	0	0.0159434	0.988	1272	tags=41%, list=12%, signal=46%
GOCC_LATE_ENDOSOME_MEMBRANE	103	0.498782	1.80506	0	0.0159182	0.988	2833	tags=50%, list=27%, signal=68%
GOBP_REGULATION_OF_CD4_POSITIVE_ALPHA_BETA_T_CELL_DIFFERENTIATION	22	0.665057	1.80475	0.00169205	0.0159307	0.988	1631	tags=55%, list=15%, signal=64%
GOBP_CYTOKINE_PRODUCTION_INVOLVED_IN_IMMUNE_RESPONSE	47	0.553013	1.80384	0.00161551	0.0160999	0.988	1806	tags=49%, list=17%, signal=59%
GOBP_RESPONSE_TO_INTERLEUKIN_6	22	0.657702	1.8038	0.00177305	0.0160507	0.988	1666	tags=41%, list=16%, signal=48%
GOBP_REGULATION_OF_CELL_ACTIVATION	264	0.439654	1.80241	0	0.0163166	0.989	1545	tags=30%, list=15%, signal=34%
GOMF_METALLOENDOPEPTIDASE_ACTIVITY	51	0.554354	1.80239	0	0.0162704	0.989	1367	tags=39%, list=13%, signal=45%
GOBP_ADHERENS_JUNCTION_ORGANIZATION	42	0.572363	1.79882	0.00165563	0.0170687	0.991	1465	tags=45%, list=14%, signal=52%
GOBP_T_HELPER_1_CELL_DIFFERENTIATION	11	0.767722	1.79679	0.00754717	0.0175005	0.992	1292	tags=55%, list=12%, signal=62%
GOBP_VACUOLE_ORGANIZATION	144	0.469118	1.79594	0	0.017635	0.992	3418	tags=55%, list=32%, signal=80%
GOBP_EXPORT_ACROSS_PLASMA_MEMBRANE	25	0.641147	1.79575	0.00330033	0.017622	0.992	2719	tags=64%, list=26%, signal=86%
GOMF_CLATHRIN_BINDING	45	0.565245	1.79573	0.00160514	0.0175726	0.992	1571	tags=36%, list=15%, signal=42%
GOBP_POSITIVE_REGULATION_OF_EPITHELIAL_CELL_PROLIFERATION	105	0.49028	1.79546	0	0.0175833	0.992	1031	tags=31%, list=10%, signal=34%
GOBP_BONE_MORPHOGENESIS	51	0.549639	1.79542	0	0.0175309	0.992	2280	tags=51%, list=21%, signal=65%
GOBP_MESONEPHRIC_TUBULE_MORPHOGENESIS	30	0.600787	1.79535	0.005	0.0174919	0.992	546	tags=27%, list=5%, signal=28%
GOBP_NEGATIVE_REGULATION_OF_SMOOTH_MUSCLE_CELL_PROLIFERATION	25	0.644385	1.79476	0.00175439	0.017585	0.992	1238	tags=44%, list=12%, signal=50%
GOCC_AUTOPHAGOSOME	83	0.504142	1.79443	0	0.0176084	0.992	3078	tags=54%, list=29%, signal=76%
GOBP_EMBRYONIC_MORPHOGENESIS	331	0.431392	1.79336	0	0.0177985	0.992	1292	tags=25%, list=12%, signal=27%
GOBP_NEGATIVE_REGULATION_OF_FIBROBLAST_GROWTH_FACTOR_RECEPTOR_SIGNALING_PATHWAY	13	0.736107	1.79292	0.00187266	0.0178504	0.992	1118	tags=54%, list=11%, signal=60%
GOBP_REGULATION_OF_EPITHELIAL_CELL_APOPTOTIC_PROCESS	49	0.54276	1.79272	0.00312989	0.0178534	0.992	1727	tags=43%, list=16%, signal=51%
GOBP_ACTIN_FILAMENT_ORGANIZATION	284	0.430867	1.79194	0	0.0180182	0.992	2555	tags=42%, list=24%, signal=53%
GOBP_REGULATION_OF_CELL_MATRIX_ADHESION	84	0.502208	1.79179	0	0.0179916	0.992	1496	tags=37%, list=14%, signal=43%
GOBP_POSITIVE_REGULATION_OF_BLOOD_VESSEL_ENDOTHELIAL_CELL_MIGRATION	42	0.577352	1.79116	0.00167785	0.0180974	0.992	2349	tags=55%, list=22%, signal=70%
GOMF_OXIDOREDUCTASE_ACTIVITY_ACTING_ON_THE_CH_NH2_GROUP_OF_DONORS	10	0.79819	1.79112	0.00369004	0.0180612	0.992	834	tags=50%, list=8%, signal=54%
GOCC_VACUOLAR_LUMEN	114	0.484907	1.79057	0	0.0181208	0.992	2016	tags=44%, list=19%, signal=54%
GOBP_METAL_ION_TRANSPORT	215	0.448488	1.79041	0	0.0181037	0.992	1743	tags=31%, list=16%, signal=37%
GOCC_LUMENAL_SIDE_OF_MEMBRANE	21	0.667653	1.78885	0.00168067	0.0184943	0.994	1706	tags=43%, list=16%, signal=51%
GOBP_REGULATION_OF_SPROUTING_ANGIOGENESIS	22	0.651097	1.78841	0.00351494	0.0185271	0.994	1137	tags=45%, list=11%, signal=51%
GOBP_METAL_ION_EXPORT	19	0.668075	1.78769	0.0017452	0.0187239	0.996	1363	tags=37%, list=13%, signal=42%
GOCC_PLASMA_MEMBRANE_PROTEIN_COMPLEX	226	0.439079	1.78645	0	0.0189584	0.996	1434	tags=28%, list=14%, signal=32%
GOBP_ENDOTHELIAL_CELL_DEVELOPMENT	43	0.567895	1.78477	0.00331126	0.0193202	0.996	2062	tags=42%, list=19%, signal=52%
GOBP_SMOOTH_MUSCLE_CONTRACTION	41	0.581736	1.78403	0	0.0194319	0.996	1323	tags=39%, list=12%, signal=44%
GOBP_NEGATIVE_REGULATION_OF_IMMUNE_SYSTEM_PROCESS	196	0.44629	1.78329	0	0.019559	0.996	1570	tags=31%, list=15%, signal=36%
GOBP_HOMOPHILIC_CELL_ADHESION_VIA_PLASMA_MEMBRANE_ADHESION_MOLECULES	46	0.561742	1.78304	0.00159744	0.0195291	0.996	1472	tags=41%, list=14%, signal=48%
GOBP_CAMERA_TYPE_EYE_DEVELOPMENT	155	0.461698	1.78205	0	0.0197015	0.996	2307	tags=38%, list=22%, signal=48%
GOBP_NEUROEPITHELIAL_CELL_DIFFERENTIATION	10	0.789344	1.78174	0.00359712	0.0197177	0.996	1170	tags=60%, list=11%, signal=67%
GOBP_NEGATIVE_REGULATION_OF_MAP_KINASE_ACTIVITY	50	0.555562	1.78173	0	0.019672	0.996	2278	tags=50%, list=21%, signal=63%
GOBP_PROTEIN_LOCALIZATION_TO_CELL_PERIPHERY	239	0.440776	1.78067	0	0.0198334	0.996	2736	tags=42%, list=26%, signal=55%
GOCC_BASOLATERAL_PLASMA_MEMBRANE	110	0.485482	1.7804	0	0.0198399	0.996	1411	tags=32%, list=13%, signal=36%
GOBP_MOVEMENT_IN_HOST_ENVIRONMENT	122	0.471956	1.78027	0	0.0198218	0.996	1382	tags=26%, list=13%, signal=30%
GOBP_ASTROCYTE_DEVELOPMENT	19	0.673001	1.77906	0.00339559	0.0200551	0.996	1557	tags=47%, list=15%, signal=55%
GOBP_T_HELPER_17_TYPE_IMMUNE_RESPONSE	12	0.748092	1.77886	0.00381679	0.020055	0.996	919	tags=50%, list=9%, signal=55%
GOBP_ALDEHYDE_BIOSYNTHETIC_PROCESS	10	0.776033	1.77835	0.00363636	0.0201222	0.996	363	tags=30%, list=3%, signal=31%
GOBP_CELL_CELL_JUNCTION_ORGANIZATION	118	0.474793	1.77715	0	0.0204043	0.997	1683	tags=38%, list=16%, signal=45%
GOBP_AXON_DEVELOPMENT	298	0.431066	1.77708	0	0.0203638	0.997	2071	tags=35%, list=20%, signal=43%
GOCC_ACTIN_BASED_CELL_PROJECTION	125	0.470663	1.777	0	0.0203267	0.997	1700	tags=34%, list=16%, signal=40%
GOBP_NEGATIVE_REGULATION_OF_IMMUNE_EFFECTOR_PROCESS	67	0.512427	1.77581	0.00151286	0.0205638	0.997	1686	tags=36%, list=16%, signal=42%
GOBP_REGULATION_OF_PROTEIN_LOCALIZATION_TO_PLASMA_MEMBRANE	69	0.520259	1.77459	0.0015748	0.0208563	0.997	1633	tags=36%, list=15%, signal=43%
GOBP_MUSCLE_SYSTEM_PROCESS	201	0.441673	1.77285	0	0.0212945	0.997	1363	tags=29%, list=13%, signal=33%
GOCC_COATED_VESICLE	201	0.448921	1.77272	0	0.0212851	0.997	2845	tags=43%, list=27%, signal=58%
GOBP_NEGATIVE_REGULATION_OF_ENDOTHELIAL_CELL_APOPTOTIC_PROCESS	18	0.685442	1.7721	0.0034904	0.0213684	0.997	1686	tags=56%, list=16%, signal=66%
GOMF_ENDOPEPTIDASE_ACTIVITY	192	0.448695	1.77194	0	0.0213557	0.997	1441	tags=26%, list=14%, signal=29%
GOBP_NEGATIVE_REGULATION_OF_CD4_POSITIVE_ALPHA_BETA_T_CELL_ACTIVATION	17	0.693829	1.77162	0.0070922	0.021361	0.997	1292	tags=47%, list=12%, signal=53%
GOBP_REGULATION_OF_CELL_SUBSTRATE_JUNCTION_ORGANIZATION	58	0.520925	1.7716	0.00154321	0.0213072	0.997	1977	tags=43%, list=19%, signal=53%
GOCC_T_TUBULE	25	0.636918	1.77151	0	0.0212713	0.997	1506	tags=48%, list=14%, signal=56%
GOBP_POSITIVE_REGULATION_OF_PEPTIDE_HORMONE_SECRETION	44	0.550708	1.77147	0	0.0212238	0.997	1446	tags=30%, list=14%, signal=34%
GOBP_VASCULAR_ENDOTHELIAL_GROWTH_FACTOR_SIGNALING_PATHWAY	27	0.615966	1.77138	0	0.0211942	0.997	1069	tags=37%, list=10%, signal=41%
GOCC_PROTEIN_COMPLEX_INVOLVED_IN_CELL_ADHESION	18	0.67786	1.77117	0.00184843	0.0212027	0.997	1282	tags=61%, list=12%, signal=69%
GOBP_T_CELL_PROLIFERATION	88	0.499165	1.77019	0	0.0214333	0.997	1631	tags=32%, list=15%, signal=37%
GOCC_APICAL_PART_OF_CELL	190	0.447791	1.76936	0	0.0215921	0.997	1411	tags=30%, list=13%, signal=34%
GOCC_CLATHRIN_COATED_VESICLE	112	0.474353	1.76766	0	0.0219798	0.997	2775	tags=43%, list=26%, signal=57%
GOBP_ARACHIDONIC_ACID_METABOLIC_PROCESS	19	0.674594	1.76764	0.00512821	0.0219225	0.997	1615	tags=42%, list=15%, signal=50%
GOMF_INSULIN_LIKE_GROWTH_FACTOR_BINDING	19	0.678035	1.76756	0.0017762	0.0218887	0.997	854	tags=53%, list=8%, signal=57%
GOBP_T_CELL_ACTIVATION	226	0.434706	1.76725	0	0.0219412	0.997	1404	tags=28%, list=13%, signal=32%
GOCC_LATE_ENDOSOME	193	0.445389	1.7665	0	0.0220854	0.997	2859	tags=44%, list=27%, signal=59%
GOBP_CELLULAR_RESPONSE_TO_VITAMIN	17	0.697147	1.76618	0.00372439	0.0221144	0.997	353	tags=35%, list=3%, signal=36%
GOBP_POSITIVE_REGULATION_OF_ERK1_AND_ERK2_CASCADE	80	0.499499	1.76608	0	0.0220746	0.997	1458	tags=33%, list=14%, signal=37%
GOBP_POSITIVE_REGULATION_OF_AUTOPHAGY	101	0.4861	1.76588	0	0.0220749	0.997	2256	tags=40%, list=21%, signal=50%
GOBP_ANTIGEN_PROCESSING_AND_PRESENTATION_OF_ENDOGENOUS_PEPTIDE_ANTIGEN	15	0.714303	1.76478	0.00350263	0.0223874	0.997	897	tags=53%, list=8%, signal=58%
GOBP_LONG_TERM_MEMORY	16	0.70804	1.76435	0.00176991	0.0224379	0.997	1176	tags=38%, list=11%, signal=42%
GOBP_EYE_MORPHOGENESIS	77	0.507831	1.76365	0	0.0225677	0.997	1968	tags=39%, list=19%, signal=47%
GOBP_REGULATION_OF_MEMBRANE_PROTEIN_ECTODOMAIN_PROTEOLYSIS	15	0.700496	1.76236	0	0.0229081	0.997	1102	tags=53%, list=10%, signal=59%
GOBP_MUSCLE_CELL_PROLIFERATION	108	0.481306	1.7609	0.00147275	0.0232182	0.997	1761	tags=34%, list=17%, signal=41%
GOBP_PLASMINOGEN_ACTIVATION	11	0.769429	1.76059	0.00547445	0.0232356	0.997	1118	tags=45%, list=11%, signal=51%
GOBP_REGULATION_OF_MAST_CELL_ACTIVATION	18	0.671807	1.75973	0.00347826	0.0234206	0.998	1382	tags=39%, list=13%, signal=45%
GOMF_L_ASCORBIC_ACID_BINDING	18	0.668672	1.75913	0.00530035	0.0235098	0.998	1713	tags=56%, list=16%, signal=66%
GOBP_POTASSIUM_ION_HOMEOSTASIS	10	0.777689	1.75888	0.00185185	0.0235284	0.998	112	tags=20%, list=1%, signal=20%
GOBP_REGULATION_OF_T_HELPER_1_TYPE_IMMUNE_RESPONSE	12	0.737507	1.7587	0.00915751	0.0235305	0.998	1631	tags=50%, list=15%, signal=59%
GOBP_INOSITOL_LIPID_MEDIATED_SIGNALING	112	0.480566	1.75858	0	0.0235163	0.998	1726	tags=33%, list=16%, signal=39%
GOCC_INTRINSIC_COMPONENT_OF_PRESYNAPTIC_MEMBRANE	19	0.660999	1.75858	0.00175747	0.0234578	0.998	2367	tags=53%, list=22%, signal=68%
GOBP_POSITIVE_REGULATION_OF_ENDOTHELIAL_CELL_CHEMOTAXIS	13	0.745675	1.75852	0.0037037	0.0234189	0.998	716	tags=46%, list=7%, signal=49%
GOBP_ICOSANOID_BIOSYNTHETIC_PROCESS	20	0.655598	1.75838	0.00509338	0.0233995	0.998	1106	tags=30%, list=10%, signal=33%
GOBP_DETECTION_OF_STIMULUS_INVOLVED_IN_SENSORY_PERCEPTION_OF_PAIN	10	0.771987	1.75834	0.00696864	0.0233554	0.998	1400	tags=70%, list=13%, signal=81%
GOBP_REGULATION_OF_HORMONE_BIOSYNTHETIC_PROCESS	13	0.736171	1.75794	0.00343643	0.0234047	0.998	1712	tags=69%, list=16%, signal=82%
GOBP_MYELOID_LEUKOCYTE_MEDIATED_IMMUNITY	344	0.419235	1.75763	0	0.0234369	0.998	2254	tags=36%, list=21%, signal=45%
GOBP_MULTICELLULAR_ORGANISMAL_SIGNALING	74	0.508262	1.75687	0	0.0236111	0.998	1400	tags=35%, list=13%, signal=40%
GOBP_AMINO_ACID_IMPORT	29	0.59879	1.75644	0.00657895	0.0236809	0.998	1655	tags=52%, list=16%, signal=61%
GOBP_HEART_MORPHOGENESIS	139	0.45965	1.75602	0	0.0237452	0.998	1666	tags=38%, list=16%, signal=45%
GOBP_SMAD_PROTEIN_SIGNAL_TRANSDUCTION	42	0.560524	1.75519	0.00168067	0.0239439	0.998	1404	tags=38%, list=13%, signal=44%
GOBP_BRANCHING_INVOLVED_IN_BLOOD_VESSEL_MORPHOGENESIS	17	0.685731	1.75495	0.00179211	0.0239666	0.998	456	tags=41%, list=4%, signal=43%
GOBP_NEGATIVE_REGULATION_OF_HYDROLASE_ACTIVITY	246	0.429839	1.75483	0	0.0239408	0.998	1743	tags=26%, list=16%, signal=30%
GOBP_ICOSANOID_METABOLIC_PROCESS	41	0.556973	1.75351	0.0015674	0.0242612	0.998	2385	tags=44%, list=22%, signal=56%
GOBP_NEGATIVE_REGULATION_OF_VASCULAR_PERMEABILITY	11	0.745562	1.7534	0.00178891	0.0242535	0.998	1686	tags=64%, list=16%, signal=76%
GOBP_REGULATION_OF_OSTEOBLAST_DIFFERENTIATION	76	0.501102	1.75298	0	0.0243126	0.998	2213	tags=50%, list=21%, signal=63%
GOBP_NEPHRON_DEVELOPMENT	69	0.514539	1.75191	0.00149701	0.0246116	0.998	686	tags=26%, list=6%, signal=28%
GOBP_PROTEIN_LOCALIZATION_TO_LYSOSOME	36	0.572727	1.75176	0.00342466	0.0245874	0.998	2194	tags=50%, list=21%, signal=63%
GOBP_LENS_FIBER_CELL_DIFFERENTIATION	18	0.670401	1.75131	0.00695652	0.024672	0.999	2257	tags=50%, list=21%, signal=63%
GOCC_PLATELET_DENSE_GRANULE	11	0.750547	1.75065	0.00542496	0.0248276	0.999	1908	tags=82%, list=18%, signal=100%
GOBP_HUMORAL_IMMUNE_RESPONSE_MEDIATED_BY_CIRCULATING_IMMUNOGLOBULIN	17	0.682454	1.74643	0.00714286	0.02598	0.999	980	tags=53%, list=9%, signal=58%
GOCC_SECRETORY_GRANULE_MEMBRANE	168	0.445871	1.74635	0	0.025942	0.999	2811	tags=52%, list=26%, signal=69%
GOMF_CARBOHYDRATE_BINDING	106	0.477936	1.74616	0	0.0259386	0.999	2286	tags=43%, list=22%, signal=55%
GOBP_POSITIVE_REGULATION_OF_CELL_ACTIVATION	157	0.448474	1.74495	0	0.0262417	0.999	1392	tags=27%, list=13%, signal=31%
GOBP_AMINO_ACID_TRANSMEMBRANE_TRANSPORT	48	0.537067	1.7444	0	0.026326	0.999	2094	tags=50%, list=20%, signal=62%
GOMF_CARGO_RECEPTOR_ACTIVITY	28	0.607175	1.7436	0.00167785	0.0264936	0.999	2255	tags=61%, list=21%, signal=77%
GOBP_EPITHELIAL_TUBE_BRANCHING_INVOLVED_IN_LUNG_MORPHOGENESIS	18	0.665898	1.7431	0.012069	0.0265854	0.999	688	tags=44%, list=6%, signal=47%
GOMF_CYTOKINE_BINDING	51	0.54115	1.7426	0	0.0266814	0.999	1362	tags=47%, list=13%, signal=54%
GOBP_LYSOSOME_LOCALIZATION	45	0.548143	1.7417	0.00326264	0.0268859	0.999	2775	tags=49%, list=26%, signal=66%
GOBP_REGULATION_OF_RECEPTOR_BINDING	14	0.699496	1.74165	0.00719425	0.0268416	0.999	2426	tags=71%, list=23%, signal=92%
GOBP_EPITHELIAL_CELL_DIFFERENTIATION	323	0.419422	1.7413	0	0.0269029	1	1404	tags=31%, list=13%, signal=34%
GOBP_EMBRYO_IMPLANTATION	31	0.595601	1.74076	0.00676819	0.0270131	1	754	tags=39%, list=7%, signal=42%
GOMF_PROTEOGLYCAN_BINDING	19	0.658977	1.73912	0.00896057	0.0274789	1	1570	tags=63%, list=15%, signal=74%
GOBP_REGULATION_OF_CELL_JUNCTION_ASSEMBLY	110	0.473501	1.73805	0	0.0278708	1	1990	tags=36%, list=19%, signal=44%
GOBP_PROSTANOID_BIOSYNTHETIC_PROCESS	14	0.703794	1.73745	0.0070922	0.0279702	1	1106	tags=36%, list=10%, signal=40%
GOBP_PEPTIDYL_TYROSINE_MODIFICATION	200	0.43666	1.73704	0	0.0280512	1	1999	tags=34%, list=19%, signal=41%
GOBP_CARTILAGE_DEVELOPMENT_INVOLVED_IN_ENDOCHONDRAL_BONE_MORPHOGENESIS	17	0.670432	1.73679	0.00732601	0.0280582	1	2241	tags=65%, list=21%, signal=82%
GOBP_SUBSTRATE_ADHESION_DEPENDENT_CELL_SPREADING	81	0.493109	1.73675	0	0.028017	1	1756	tags=41%, list=17%, signal=48%
GOBP_CELL_PROLIFERATION_INVOLVED_IN_KIDNEY_DEVELOPMENT	11	0.755392	1.7364	0.00358423	0.0280746	1	546	tags=45%, list=5%, signal=48%
GOBP_NEGATIVE_REGULATION_OF_ALPHA_BETA_T_CELL_ACTIVATION	20	0.653844	1.73619	0.0143113	0.0280993	1	1292	tags=40%, list=12%, signal=45%
GOMF_FILAMIN_BINDING	10	0.773362	1.7361	0.00361664	0.0280532	1	1372	tags=60%, list=13%, signal=69%
GOBP_CORONARY_VASCULATURE_DEVELOPMENT	31	0.579768	1.73589	0.00169205	0.0280551	1	1404	tags=42%, list=13%, signal=48%
GOBP_ENDOTHELIUM_DEVELOPMENT	72	0.501653	1.73508	0.00298507	0.0282678	1	1031	tags=33%, list=10%, signal=37%
GOBP_DETECTION_OF_MECHANICAL_STIMULUS	17	0.680131	1.73438	0.0036036	0.0284341	1	1400	tags=53%, list=13%, signal=61%
GOCC_IMMUNOLOGICAL_SYNAPSE	20	0.645988	1.73379	0.00866551	0.0285898	1	2551	tags=70%, list=24%, signal=92%
GOBP_ASTROCYTE_DIFFERENTIATION	34	0.570781	1.73282	0.0114754	0.0288469	1	1170	tags=38%, list=11%, signal=43%
GOBP_NEGATIVE_REGULATION_OF_T_HELPER_CELL_DIFFERENTIATION	12	0.740011	1.73204	0.0037037	0.0290554	1	1292	tags=50%, list=12%, signal=57%
GOBP_REGULATION_OF_MUSCLE_CONTRACTION	68	0.497898	1.73161	0	0.0291168	1	1363	tags=37%, list=13%, signal=42%
GOBP_PRIMARY_ALCOHOL_METABOLIC_PROCESS	40	0.567324	1.73075	0	0.0293192	1	2038	tags=45%, list=19%, signal=55%
GOBP_POSTSYNAPTIC_MEMBRANE_ORGANIZATION	20	0.638069	1.73067	0.00327869	0.0292739	1	408	tags=20%, list=4%, signal=21%
GOCC_LAMELLIPODIUM	159	0.440589	1.7306	0	0.0292336	1	2687	tags=45%, list=25%, signal=60%
GOCC_FILOPODIUM	74	0.496338	1.73022	0	0.0292896	1	1700	tags=36%, list=16%, signal=43%
GOBP_HORMONE_BIOSYNTHETIC_PROCESS	28	0.612772	1.72895	0.00353357	0.029696	1	2464	tags=64%, list=23%, signal=83%
GOBP_BONE_GROWTH	19	0.645685	1.72892	0.00929368	0.0296477	1	2241	tags=68%, list=21%, signal=87%
GOCC_RUFFLE_MEMBRANE	70	0.495774	1.72891	0	0.029585	1	2460	tags=56%, list=23%, signal=72%
GOBP_POSITIVE_REGULATION_OF_CYTOKINE_PRODUCTION_INVOLVED_IN_IMMUNE_RESPONSE	26	0.598908	1.72878	0.0121951	0.0295518	1	1806	tags=50%, list=17%, signal=60%
GOMF_SULFURIC_ESTER_HYDROLASE_ACTIVITY	13	0.726037	1.72873	0.00548446	0.0295066	1	2008	tags=77%, list=19%, signal=95%
GOBP_RESPONSE_TO_VITAMIN_D	16	0.68038	1.72835	0.00878735	0.029542	1	1272	tags=44%, list=12%, signal=50%
GOBP_METANEPHROS_MORPHOGENESIS	16	0.677112	1.72822	0.00537634	0.029514	1	686	tags=44%, list=6%, signal=47%
GOBP_REGULATION_OF_LAMELLIPODIUM_ORGANIZATION	42	0.545343	1.72779	0.00332226	0.0296403	1	2822	tags=60%, list=27%, signal=81%
GOBP_LIPID_LOCALIZATION	257	0.425215	1.72617	0	0.0301516	1	2346	tags=38%, list=22%, signal=48%
GOBP_ANTIGEN_PROCESSING_AND_PRESENTATION_OF_ENDOGENOUS_ANTIGEN	17	0.677938	1.72485	0.00519931	0.0305118	1	897	tags=47%, list=8%, signal=51%
GOBP_POSITIVE_REGULATION_OF_RESPONSE_TO_EXTERNAL_STIMULUS	254	0.423723	1.7243	0	0.0306403	1	2125	tags=31%, list=20%, signal=37%
GOBP_MONOAMINE_TRANSPORT	17	0.681003	1.7242	0.00880282	0.030603	1	832	tags=29%, list=8%, signal=32%
GOBP_MEMORY	49	0.532531	1.72224	0	0.031269	1	1181	tags=33%, list=11%, signal=37%
GOBP_MESENCHYMAL_CELL_DIFFERENTIATION	146	0.448523	1.72133	0	0.0315428	1	1404	tags=32%, list=13%, signal=37%
GOBP_POSITIVE_REGULATION_OF_LEUKOCYTE_PROLIFERATION	58	0.512472	1.72132	0	0.0314777	1	1141	tags=26%, list=11%, signal=29%
GOCC_PRESYNAPTIC_ACTIVE_ZONE_MEMBRANE	15	0.68687	1.72086	0.0122164	0.031605	1	345	tags=27%, list=3%, signal=28%
GOCC_INTRINSIC_COMPONENT_OF_SYNAPTIC_MEMBRANE	36	0.569865	1.72043	0.00161031	0.0316821	1	2367	tags=39%, list=22%, signal=50%
GOMF_ANTIGEN_BINDING	22	0.631551	1.71997	0.00171233	0.0318011	1	1240	tags=50%, list=12%, signal=56%
GOBP_REGULATION_OF_ALPHA_BETA_T_CELL_ACTIVATION	42	0.555221	1.71979	0.00163132	0.0317947	1	1292	tags=38%, list=12%, signal=43%
GOBP_GLANDULAR_EPITHELIAL_CELL_DIFFERENTIATION	25	0.602384	1.71956	0.00853242	0.0318521	1	1532	tags=40%, list=14%, signal=47%
GOBP_RESPONSE_TO_STEROID_HORMONE	197	0.43079	1.71944	0	0.031827	1	1449	tags=26%, list=14%, signal=30%
GOCC_GOLGI_ASSOCIATED_VESICLE	69	0.495873	1.71931	0	0.0318092	1	2954	tags=49%, list=28%, signal=68%
GOBP_PROSTATE_GLAND_DEVELOPMENT	23	0.620518	1.71902	0.00173913	0.0318312	1	511	tags=26%, list=5%, signal=27%
GOBP_NEGATIVE_REGULATION_OF_EPITHELIAL_CELL_APOPTOTIC_PROCESS	29	0.603099	1.719	0.00340715	0.0317643	1	1931	tags=52%, list=18%, signal=63%
GOMF_PHOSPHATIDYLINOSITOL_3_KINASE_BINDING	20	0.638873	1.71859	0.00695652	0.0318655	1	1245	tags=35%, list=12%, signal=40%
GOBP_L_AMINO_ACID_TRANSPORT	35	0.566911	1.71852	0.00486224	0.0318293	1	2094	tags=51%, list=20%, signal=64%
GOMF_AMINOPEPTIDASE_ACTIVITY	29	0.592763	1.71841	0.00164474	0.0318022	1	2774	tags=45%, list=26%, signal=61%
GOBP_RETINOL_METABOLIC_PROCESS	14	0.696021	1.71656	0.00914077	0.0322864	1	877	tags=36%, list=8%, signal=39%
GOBP_PROTEIN_KINASE_B_SIGNALING	134	0.451502	1.71562	0	0.0325452	1	1695	tags=28%, list=16%, signal=33%
GOBP_AUTOPHAGOSOME_ORGANIZATION	86	0.489814	1.71484	0	0.0327496	1	2337	tags=38%, list=22%, signal=49%
GOBP_NEGATIVE_REGULATION_OF_RESPONSE_TO_EXTERNAL_STIMULUS	180	0.434016	1.71396	0	0.0330103	1	1161	tags=23%, list=11%, signal=26%
GOBP_CALCIUM_ION_TRANSPORT	173	0.445263	1.71357	0	0.0330961	1	1743	tags=31%, list=16%, signal=37%
GOBP_EPITHELIAL_TUBE_MORPHOGENESIS	186	0.434324	1.71222	0	0.033548	1	1666	tags=30%, list=16%, signal=34%
GOBP_BASEMENT_MEMBRANE_ORGANIZATION	21	0.638131	1.71189	0.0102916	0.0335819	1	1557	tags=48%, list=15%, signal=56%
GOBP_PROTEIN_PROCESSING	125	0.452535	1.71106	0	0.0338457	1	1318	tags=27%, list=12%, signal=31%
GOMF_ACTIN_DEPENDENT_ATPASE_ACTIVITY	13	0.698096	1.7106	0.0069808	0.0339309	1	1585	tags=69%, list=15%, signal=81%
GOBP_POSITIVE_REGULATION_OF_PEPTIDYL_TYROSINE_PHOSPHORYLATION	80	0.493785	1.70915	0	0.0343343	1	1712	tags=41%, list=16%, signal=49%
GOBP_AUTOPHAGY_OF_MITOCHONDRION	69	0.499448	1.70904	0	0.0342845	1	2907	tags=46%, list=27%, signal=63%
GOBP_MESENCHYMAL_CELL_PROLIFERATION	23	0.609581	1.70898	0.00672269	0.0342463	1	911	tags=35%, list=9%, signal=38%
GOBP_ENDOTHELIAL_CELL_APOPTOTIC_PROCESS	29	0.590021	1.70755	0.00662252	0.0347413	1	1686	tags=48%, list=16%, signal=57%
GOBP_ESTABLISHMENT_OF_ENDOTHELIAL_BARRIER	32	0.568769	1.70698	0.0102041	0.0349118	1	2427	tags=53%, list=23%, signal=69%
GOCC_RUFFLE	138	0.449275	1.70603	0	0.0352145	1	2485	tags=47%, list=23%, signal=61%
GOBP_POSITIVE_REGULATION_OF_RESPONSE_TO_WOUNDING	40	0.550051	1.706	0.00793651	0.0351522	1	1333	tags=38%, list=13%, signal=43%
GOMF_MONOOXYGENASE_ACTIVITY	24	0.611608	1.70575	0.0101523	0.035171	1	1070	tags=38%, list=10%, signal=42%
GOBP_CLATHRIN_DEPENDENT_ENDOCYTOSIS	38	0.555299	1.70512	0.00325203	0.0353795	1	2271	tags=47%, list=21%, signal=60%
GOBP_REGULATION_OF_PLATELET_ACTIVATION	16	0.673217	1.70494	0.0109489	0.0353641	1	380	tags=31%, list=4%, signal=32%
GOCC_LIPID_DROPLET	65	0.5025	1.70489	0	0.0353156	1	2842	tags=45%, list=27%, signal=61%
GOBP_RESPONSE_TO_LAMINAR_FLUID_SHEAR_STRESS	12	0.711825	1.70472	0.00521739	0.0352827	1	1333	tags=67%, list=13%, signal=76%
GOBP_INACTIVATION_OF_MAPK_ACTIVITY	17	0.655054	1.70451	0.0155979	0.0352658	1	2588	tags=65%, list=24%, signal=85%
GOBP_REGULATION_OF_LIPASE_ACTIVITY	41	0.559216	1.70434	0	0.0352773	1	1170	tags=39%, list=11%, signal=44%
GOBP_CHEMOKINE_C_X_C_MOTIF_LIGAND_2_PRODUCTION	11	0.736279	1.70418	0.0212766	0.0352779	1	364	tags=27%, list=3%, signal=28%
GOBP_POSITIVE_REGULATION_OF_NEURON_PROJECTION_DEVELOPMENT	97	0.465842	1.70418	0	0.0352079	1	1817	tags=38%, list=17%, signal=46%
GOBP_NEGATIVE_REGULATION_OF_ENDOTHELIAL_CELL_PROLIFERATION	22	0.624875	1.7039	0.0087108	0.035224	1	1118	tags=41%, list=11%, signal=46%
GOBP_POSITIVE_REGULATION_OF_ENDOTHELIAL_CELL_PROLIFERATION	54	0.518507	1.70364	0.00481541	0.0352444	1	1478	tags=39%, list=14%, signal=45%
GOBP_REGULATION_OF_PROTEIN_LOCALIZATION_TO_MEMBRANE	140	0.443963	1.7034	0	0.0352847	1	1633	tags=28%, list=15%, signal=32%
GOBP_TONGUE_DEVELOPMENT	10	0.754357	1.70338	0.00932836	0.0352218	1	472	tags=30%, list=4%, signal=31%
GOBP_REGULATION_OF_PROTEIN_MATURATION	35	0.558996	1.70316	0.00621118	0.035253	1	1419	tags=37%, list=13%, signal=43%
GOCC_TRANS_GOLGI_NETWORK	192	0.42528	1.70278	0	0.0353521	1	2556	tags=37%, list=24%, signal=48%
GOBP_SENSORY_PERCEPTION_OF_LIGHT_STIMULUS	66	0.497515	1.70256	0.00153139	0.0353744	1	2077	tags=33%, list=20%, signal=41%
GOCC_SYNAPTIC_MEMBRANE	138	0.441492	1.70209	0	0.0354722	1	1506	tags=22%, list=14%, signal=26%
GOBP_NEGATIVE_REGULATION_OF_CELL_ACTIVATION	88	0.476181	1.70181	0	0.0355396	1	1545	tags=36%, list=15%, signal=42%
GOBP_NEGATIVE_REGULATION_OF_ALPHA_BETA_T_CELL_DIFFERENTIATION	16	0.674795	1.70051	0.0103448	0.0359973	1	1292	tags=44%, list=12%, signal=50%
GOMF_GTP_DEPENDENT_PROTEIN_BINDING	14	0.686463	1.70037	0.0160714	0.0359941	1	2121	tags=50%, list=20%, signal=62%
GOBP_POSITIVE_REGULATION_OF_NEURON_DIFFERENTIATION	40	0.538598	1.70008	0.0066335	0.0360275	1	696	tags=28%, list=7%, signal=29%
GOBP_RESPONSE_TO_METAL_ION	194	0.428339	1.69959	0	0.0361491	1	1335	tags=27%, list=13%, signal=30%
GOBP_CELL_CHEMOTAXIS	123	0.452324	1.69845	0	0.0365423	1	1590	tags=33%, list=15%, signal=39%
GOBP_POSITIVE_REGULATION_OF_LIPID_BIOSYNTHETIC_PROCESS	43	0.536226	1.69825	0.00686106	0.0365187	1	2370	tags=42%, list=22%, signal=54%
GOMF_CATION_TRANSMEMBRANE_TRANSPORTER_ACTIVITY	249	0.416006	1.69817	0	0.0364848	1	2201	tags=34%, list=21%, signal=42%
GOBP_POSITIVE_REGULATION_OF_CHEMOKINE_PRODUCTION	25	0.598277	1.69815	0.0087108	0.0364297	1	1474	tags=40%, list=14%, signal=46%
GOBP_AMINOGLYCAN_BIOSYNTHETIC_PROCESS	66	0.502019	1.69779	0	0.0365261	1	1877	tags=39%, list=18%, signal=48%
GOCC_ENDOLYSOSOME_MEMBRANE	11	0.735792	1.69749	0.0105634	0.0365793	1	2724	tags=91%, list=26%, signal=122%
GOBP_REGULATION_OF_SECRETION	292	0.411037	1.6971	0	0.036703	1	1532	tags=26%, list=14%, signal=30%
GOMF_METALLOEXOPEPTIDASE_ACTIVITY	32	0.568299	1.69658	0.00649351	0.0368556	1	2222	tags=44%, list=21%, signal=55%
GOBP_REGULATION_OF_CHEMOTAXIS	113	0.453323	1.69629	0	0.0369164	1	1865	tags=36%, list=18%, signal=44%
GOBP_POSITIVE_REGULATION_OF_INSULIN_SECRETION_INVOLVED_IN_CELLULAR_RESPONSE_TO_GLUCOSE_STIMULUS	18	0.651533	1.69614	0.00341297	0.0368926	1	1446	tags=39%, list=14%, signal=45%
GOBP_POSITIVE_REGULATION_OF_WOUND_HEALING	33	0.572093	1.69506	0.00657895	0.0372374	1	1333	tags=36%, list=13%, signal=41%
GOBP_REGULATION_OF_BIOMINERALIZATION	46	0.53275	1.6946	0	0.0373851	1	1470	tags=43%, list=14%, signal=50%
GOBP_NEGATIVE_REGULATION_OF_REACTIVE_OXYGEN_SPECIES_METABOLIC_PROCESS	35	0.56091	1.69431	0.00658979	0.0374153	1	2148	tags=37%, list=20%, signal=46%
GOMF_CALCIUM_DEPENDENT_PHOSPHOLIPID_BINDING	23	0.604938	1.69392	0.0034904	0.0374975	1	1223	tags=43%, list=12%, signal=49%
GOBP_IMPORT_ACROSS_PLASMA_MEMBRANE	77	0.488435	1.69294	0.00319489	0.0378424	1	1655	tags=38%, list=16%, signal=44%
GOCC_CELL_CELL_JUNCTION	293	0.409945	1.69292	0	0.0377798	1	1617	tags=33%, list=15%, signal=38%
GOBP_CHONDROCYTE_DEVELOPMENT	19	0.653117	1.69269	0.0109489	0.0377963	1	1334	tags=37%, list=13%, signal=42%
GOBP_SENSORY_ORGAN_DEVELOPMENT	252	0.416351	1.69231	0	0.0378749	1	1309	tags=25%, list=12%, signal=28%
GOBP_REGULATION_OF_ACTIN_FILAMENT_BASED_PROCESS	254	0.417905	1.69164	0	0.0380693	1	2555	tags=42%, list=24%, signal=54%
GOBP_REGULATION_OF_CELL_MIGRATION_INVOLVED_IN_SPROUTING_ANGIOGENESIS	27	0.596021	1.69159	0.00665557	0.0380108	1	1478	tags=41%, list=14%, signal=47%
GOBP_REGULATION_OF_BMP_SIGNALING_PATHWAY	51	0.520121	1.69081	0.0033389	0.0382479	1	1404	tags=39%, list=13%, signal=45%
GOBP_CELLULAR_RESPONSE_TO_RETINOIC_ACID	31	0.56789	1.68998	0.0102916	0.0385027	1	920	tags=32%, list=9%, signal=35%
GOBP_STRIATED_MUSCLE_CELL_DIFFERENTIATION	142	0.446657	1.68935	0	0.0386457	1	2181	tags=42%, list=21%, signal=52%
GOBP_CELLULAR_EXTRAVASATION	26	0.587747	1.68856	0.00350877	0.0389458	1	1282	tags=42%, list=12%, signal=48%
GOMF_ARYLSULFATASE_ACTIVITY	10	0.749481	1.68839	0.0137931	0.0389496	1	2666	tags=100%, list=25%, signal=133%
GOBP_POSITIVE_REGULATION_OF_P38MAPK_CASCADE	17	0.658126	1.68609	0.0136752	0.0398946	1	892	tags=35%, list=8%, signal=38%
GOMF_SYMPORTER_ACTIVITY	54	0.515848	1.68568	0.00159744	0.0400355	1	2536	tags=46%, list=24%, signal=61%
GOBP_LEUKOCYTE_DIFFERENTIATION	267	0.409014	1.68481	0	0.0403334	1	1309	tags=25%, list=12%, signal=28%
GOBP_CARDIAC_CHAMBER_DEVELOPMENT	86	0.468842	1.68456	0	0.0403817	1	1626	tags=41%, list=15%, signal=48%
GOCC_FILOPODIUM_MEMBRANE	14	0.69806	1.68258	0.00883392	0.0411164	1	897	tags=57%, list=8%, signal=62%
GOBP_REGULATION_OF_INTEGRIN_MEDIATED_SIGNALING_PATHWAY	14	0.685873	1.68245	0.00544465	0.0411064	1	2178	tags=71%, list=21%, signal=90%
GOBP_REGULATION_OF_FILOPODIUM_ASSEMBLY	33	0.551368	1.68244	0.00483092	0.0410356	1	1297	tags=30%, list=12%, signal=34%
GOBP_TOLL_LIKE_RECEPTOR_SIGNALING_PATHWAY	94	0.467867	1.67853	0	0.0426808	1	2997	tags=47%, list=28%, signal=65%
GOBP_NEGATIVE_REGULATION_OF_LIPASE_ACTIVITY	10	0.750356	1.67823	0.011811	0.0427101	1	1170	tags=70%, list=11%, signal=79%
GOBP_CELLULAR_RESPONSE_TO_AMYLOID_BETA	20	0.623112	1.67799	0.0122378	0.0427352	1	747	tags=35%, list=7%, signal=38%
GOBP_REGULATION_OF_DEFENSE_RESPONSE	346	0.402118	1.67735	0	0.0429413	1	2095	tags=29%, list=20%, signal=34%
GOBP_POSITIVE_REGULATION_OF_CHEMOTAXIS	69	0.489617	1.67723	0	0.0428977	1	1738	tags=36%, list=16%, signal=43%
GOCC_CLATHRIN_COATED_VESICLE_MEMBRANE	62	0.49698	1.6772	0	0.0428344	1	2775	tags=47%, list=26%, signal=63%
GOBP_RESPONSE_TO_REDOX_STATE	12	0.717959	1.67714	0.0177936	0.0427932	1	2304	tags=67%, list=22%, signal=85%
GOMF_COPPER_ION_BINDING	30	0.559309	1.67659	0.0149502	0.0429638	1	1220	tags=23%, list=11%, signal=26%
GOBP_CELLULAR_RESPONSE_TO_GROWTH_HORMONE_STIMULUS	15	0.675908	1.6765	0.0111732	0.0429266	1	1062	tags=40%, list=10%, signal=44%
GOMF_OXIDOREDUCTASE_ACTIVITY_ACTING_ON_PEROXIDE_AS_ACCEPTOR	26	0.590196	1.67588	0.00513699	0.0431122	1	2259	tags=42%, list=21%, signal=54%
GOBP_REGULATION_OF_CALCIUM_MEDIATED_SIGNALING	31	0.548505	1.67545	0.00830565	0.0432135	1	1363	tags=35%, list=13%, signal=41%
GOBP_APOPTOTIC_CELL_CLEARANCE	30	0.570462	1.67503	0.00813008	0.0433264	1	1394	tags=43%, list=13%, signal=50%
GOBP_POSITIVE_REGULATION_OF_TYROSINE_PHOSPHORYLATION_OF_STAT_PROTEIN	22	0.607984	1.67503	0.00797448	0.0432513	1	1820	tags=55%, list=17%, signal=66%
GOBP_FATTY_ACID_TRANSPORT	73	0.491174	1.67424	0.00315956	0.0435039	1	1878	tags=42%, list=18%, signal=51%
GOBP_LUNG_MORPHOGENESIS	31	0.56141	1.67406	0.0118443	0.0435212	1	688	tags=29%, list=6%, signal=31%
GOBP_CHLORIDE_TRANSPORT	37	0.546858	1.67401	0.00494234	0.043458	1	1426	tags=30%, list=13%, signal=34%
GOBP_PHENOL_CONTAINING_COMPOUND_METABOLIC_PROCESS	33	0.555982	1.6726	0.00672269	0.0439638	1	615	tags=27%, list=6%, signal=29%
GOBP_AMINOGLYCAN_METABOLIC_PROCESS	93	0.463316	1.67215	0.0029985	0.0441215	1	2365	tags=47%, list=22%, signal=60%
GOBP_ENDOCRINE_PANCREAS_DEVELOPMENT	22	0.610872	1.67207	0.0116086	0.044079	1	1532	tags=36%, list=14%, signal=42%
GOBP_CELL_MORPHOGENESIS_INVOLVED_IN_NEURON_DIFFERENTIATION	345	0.396187	1.67049	0	0.0447663	1	2587	tags=40%, list=24%, signal=51%
GOBP_BLOOD_VESSEL_ENDOTHELIAL_CELL_PROLIFERATION_INVOLVED_IN_SPROUTING_ANGIOGENESIS	11	0.722399	1.67032	0.0151515	0.0447673	1	2473	tags=64%, list=23%, signal=83%
GOMF_HORMONE_BINDING	30	0.566587	1.6702	0.00869565	0.0447376	1	1563	tags=33%, list=15%, signal=39%
GOBP_L_ALPHA_AMINO_ACID_TRANSMEMBRANE_TRANSPORT	34	0.557416	1.67014	0.0104895	0.0446827	1	2094	tags=53%, list=20%, signal=66%
GOBP_ASTROCYTE_ACTIVATION	10	0.74878	1.67007	0.00863558	0.0446474	1	1161	tags=50%, list=11%, signal=56%
GOBP_ALPHA_BETA_T_CELL_PROLIFERATION	15	0.661543	1.66963	0.0104348	0.0447263	1	2515	tags=67%, list=24%, signal=87%
GOBP_SUBPALLIUM_DEVELOPMENT	12	0.694709	1.66896	0.0230089	0.0450177	1	544	tags=33%, list=5%, signal=35%
GOBP_NEGATIVE_REGULATION_OF_EPITHELIAL_CELL_PROLIFERATION	77	0.481574	1.66838	0.00309119	0.0452078	1	1460	tags=34%, list=14%, signal=39%
GOBP_NEGATIVE_REGULATION_OF_STEROID_METABOLIC_PROCESS	14	0.665023	1.66826	0.0108893	0.0451758	1	1551	tags=43%, list=15%, signal=50%
GOBP_REGULATION_OF_SYSTEM_PROCESS	242	0.412115	1.66824	0	0.0451053	1	1400	tags=28%, list=13%, signal=31%
GOBP_CELL_CELL_JUNCTION_ASSEMBLY	76	0.475403	1.66738	0.00151286	0.0453976	1	1683	tags=38%, list=16%, signal=45%
GOBP_NEGATIVE_REGULATION_OF_ERBB_SIGNALING_PATHWAY	44	0.523941	1.66728	0.00321543	0.0453652	1	2257	tags=41%, list=21%, signal=52%
GOBP_INTERLEUKIN_8_PRODUCTION	38	0.5468	1.66697	0.0115894	0.045398	1	941	tags=24%, list=9%, signal=26%
GOBP_MESODERM_DEVELOPMENT	62	0.491975	1.66668	0.00310559	0.0454616	1	1897	tags=39%, list=18%, signal=47%
GOBP_AMINOGLYCAN_CATABOLIC_PROCESS	38	0.538314	1.66659	0.0151261	0.0454275	1	1363	tags=42%, list=13%, signal=48%
GOMF_VOLTAGE_GATED_CALCIUM_CHANNEL_ACTIVITY	13	0.700727	1.66628	0.00900901	0.0455135	1	1726	tags=62%, list=16%, signal=73%
GOBP_KIDNEY_EPITHELIUM_DEVELOPMENT	69	0.488763	1.666	0.00452489	0.045563	1	686	tags=26%, list=6%, signal=28%
GOMF_MICROFILAMENT_MOTOR_ACTIVITY	14	0.673482	1.66579	0.0119048	0.045576	1	1672	tags=71%, list=16%, signal=85%
GOCC_SPECIFIC_GRANULE	92	0.460458	1.66565	0.00297177	0.0455476	1	2929	tags=57%, list=28%, signal=77%
GOBP_CARDIAC_CONDUCTION	60	0.502057	1.66562	0.00325203	0.0454872	1	1552	tags=35%, list=15%, signal=41%
GOBP_PLASMA_LIPOPROTEIN_PARTICLE_CLEARANCE	29	0.566387	1.66525	0.00856164	0.0455949	1	2271	tags=55%, list=21%, signal=70%
GOBP_VACUOLAR_TRANSPORT	127	0.436973	1.66453	0.00144928	0.0458337	1	2865	tags=39%, list=27%, signal=53%
GOBP_REGULATION_OF_MORPHOGENESIS_OF_AN_EPITHELIUM	31	0.560153	1.66441	0.00649351	0.0458067	1	1404	tags=39%, list=13%, signal=44%
GOMF_CALCIUM_DEPENDENT_PROTEIN_BINDING	41	0.53859	1.66383	0.0116086	0.0459565	1	2833	tags=59%, list=27%, signal=80%
GOMF_PROTEIN_TYROSINE_KINASE_ACTIVITY	80	0.471843	1.66345	0.00458015	0.046057	1	1968	tags=34%, list=19%, signal=41%
GOBP_DIVALENT_INORGANIC_CATION_HOMEOSTASIS	201	0.416184	1.66297	0	0.0462264	1	1964	tags=33%, list=19%, signal=40%
GOBP_ORGANELLE_MEMBRANE_FUSION	82	0.47122	1.66292	0.00452489	0.0461674	1	3074	tags=50%, list=29%, signal=70%
GOBP_COLUMNAR_CUBOIDAL_EPITHELIAL_CELL_DIFFERENTIATION	45	0.521848	1.66283	0.00165563	0.0461197	1	1701	tags=42%, list=16%, signal=50%
GOCC_APICAL_PLASMA_MEMBRANE	150	0.431059	1.66261	0	0.0461522	1	1692	tags=33%, list=16%, signal=39%
GOBP_REGULATION_OF_CELL_PROJECTION_ASSEMBLY	134	0.43374	1.66249	0	0.04614	1	2446	tags=43%, list=23%, signal=55%
GOBP_REGULATION_OF_WNT_SIGNALING_PATHWAY	263	0.404949	1.66141	0	0.0465736	1	1978	tags=26%, list=19%, signal=31%
GOBP_MODULATION_BY_SYMBIONT_OF_ENTRY_INTO_HOST	29	0.569391	1.66023	0.00686106	0.0470583	1	2671	tags=59%, list=25%, signal=78%
GOCC_SIDE_OF_MEMBRANE	229	0.41125	1.65985	0	0.047167	1	1706	tags=30%, list=16%, signal=35%
GOBP_RECEPTOR_METABOLIC_PROCESS	113	0.447744	1.65947	0.00151745	0.0472699	1	2655	tags=44%, list=25%, signal=58%
GOBP_PROTEOGLYCAN_METABOLIC_PROCESS	52	0.509982	1.65884	0.00653595	0.0474757	1	1877	tags=44%, list=18%, signal=53%
GOCC_INTRINSIC_COMPONENT_OF_POSTSYNAPTIC_MEMBRANE	22	0.612329	1.65833	0.0104348	0.0476578	1	2367	tags=45%, list=22%, signal=58%
GOBP_PATHWAY_RESTRICTED_SMAD_PROTEIN_PHOSPHORYLATION	37	0.540376	1.6578	0.00479233	0.0478197	1	1404	tags=49%, list=13%, signal=56%
GOCC_AUTOPHAGOSOME_MEMBRANE	32	0.555927	1.65723	0.00991735	0.0479974	1	3078	tags=59%, list=29%, signal=83%
GOBP_CAMERA_TYPE_EYE_MORPHOGENESIS	63	0.492287	1.65721	0.003125	0.0479293	1	1077	tags=27%, list=10%, signal=30%
GOBP_METAL_ION_HOMEOSTASIS	286	0.399913	1.65696	0	0.0479729	1	1828	tags=28%, list=17%, signal=33%
GOBP_REGULATION_OF_IMMUNE_EFFECTOR_PROCESS	191	0.41783	1.65684	0	0.0479525	1	1485	tags=26%, list=14%, signal=30%
GOBP_ENDOPLASMIC_RETICULUM_CALCIUM_ION_HOMEOSTASIS	23	0.597051	1.6565	0.0140105	0.0480636	1	2362	tags=39%, list=22%, signal=50%
GOMF_PEPTIDASE_ACTIVITY	312	0.395038	1.65567	0	0.0483999	1	2042	tags=27%, list=19%, signal=32%
GOCC_PHAGOCYTIC_VESICLE_MEMBRANE	60	0.497852	1.65529	0.013289	0.0484714	1	2788	tags=48%, list=26%, signal=65%
GOBP_REGULATION_OF_T_CELL_ACTIVATION	147	0.42632	1.65513	0.00140845	0.0484593	1	1404	tags=29%, list=13%, signal=32%
GOBP_REGULATION_OF_NEUTROPHIL_MIGRATION	20	0.618826	1.65352	0.0110294	0.0491489	1	1570	tags=50%, list=15%, signal=59%
GOCC_CORTICAL_ACTIN_CYTOSKELETON	52	0.498464	1.6529	0	0.0493544	1	2059	tags=44%, list=19%, signal=55%
GOBP_RESPONSE_TO_MANGANESE_ION	12	0.6971	1.65265	0.0267686	0.0494026	1	2362	tags=67%, list=22%, signal=86%
GOMF_ANKYRIN_BINDING	11	0.7185	1.65192	0.0147059	0.0496844	1	925	tags=36%, list=9%, signal=40%
GOBP_REGULATION_OF_RHO_PROTEIN_SIGNAL_TRANSDUCTION	52	0.502375	1.65146	0.00934579	0.0498504	1	1895	tags=42%, list=18%, signal=51%
GOBP_REGULATION_OF_ACTION_POTENTIAL	25	0.584547	1.65131	0.00692042	0.0498454	1	1772	tags=40%, list=17%, signal=48%
GOCC_TRANSPORT_VESICLE	240	0.408233	1.65129	0	0.0497756	1	2970	tags=43%, list=28%, signal=58%
GOBP_PEPTIDYL_PROLINE_HYDROXYLATION	15	0.666998	1.65113	0.0144144	0.0497832	1	1746	tags=53%, list=16%, signal=64%
GOBP_GRANULOCYTE_MIGRATION	51	0.512437	1.65106	0.00308642	0.0497299	1	1610	tags=43%, list=15%, signal=51%
GOBP_REGULATION_OF_NATURAL_KILLER_CELL_MEDIATED_IMMUNITY	14	0.670896	1.65099	0.0192644	0.0496734	1	1545	tags=57%, list=15%, signal=67%
GOBP_INTEGRIN_ACTIVATION	12	0.717538	1.65091	0.0121739	0.049633	1	1282	tags=58%, list=12%, signal=66%
GOBP_NEGATIVE_REGULATION_OF_CD4_POSITIVE_ALPHA_BETA_T_CELL_DIFFERENTIATION	15	0.677649	1.65087	0.0155172	0.0495643	1	1292	tags=47%, list=12%, signal=53%
GOBP_POSITIVE_REGULATION_OF_SECRETION	146	0.431188	1.6507	0	0.0495844	1	1726	tags=27%, list=16%, signal=32%
GOBP_RESPONSE_TO_ESTROGEN	42	0.529833	1.65007	0.00675676	0.0498015	1	1297	tags=36%, list=12%, signal=41%
GOBP_SECOND_MESSENGER_MEDIATED_SIGNALING	130	0.438457	1.65003	0.00290276	0.0497292	1	1265	tags=25%, list=12%, signal=28%
GOBP_CHONDROCYTE_PROLIFERATION	11	0.725548	1.64982	0.0157618	0.0497472	1	981	tags=55%, list=9%, signal=60%
GOMF_GROWTH_FACTOR_RECEPTOR_BINDING	67	0.478621	1.64859	0.00615385	0.0499353	1	2405	tags=39%, list=23%, signal=50%
GOBP_POSITIVE_REGULATION_OF_STRESS_ACTIVATED_PROTEIN_KINASE_SIGNALING_CASCADE	75	0.471991	1.64847	0.00318979	0.0499059	1	2992	tags=52%, list=28%, signal=72%
GOBP_ACTIN_FILAMENT_BUNDLE_ORGANIZATION	110	0.448636	1.64846	0.0015083	0.0498292	1	1484	tags=27%, list=14%, signal=31%
GOBP_DNA_DEPENDENT_DNA_REPLICATION	141	-0.738107	-3.11542	0	0	0	954	tags=50%, list=9%, signal=55%
GOCC_CHROMOSOMAL_REGION	287	-0.66801	-3.0961	0	0	0	1488	tags=43%, list=14%, signal=48%
GOBP_CELL_CYCLE_DNA_REPLICATION	59	-0.826815	-3.05179	0	0	0	1208	tags=75%, list=11%, signal=84%
GOBP_DNA_REPLICATION	246	-0.666128	-3.03951	0	0	0	1159	tags=44%, list=11%, signal=48%
GOBP_DOUBLE_STRAND_BREAK_REPAIR	213	-0.672136	-3.02008	0	0	0	1421	tags=44%, list=13%, signal=49%
GOBP_CHROMOSOME_SEGREGATION	260	-0.650284	-2.98303	0	0	0	1095	tags=37%, list=10%, signal=41%
GOBP_DNA_RECOMBINATION	209	-0.666582	-2.97583	0	0	0	1310	tags=44%, list=12%, signal=49%
GOBP_MITOTIC_SISTER_CHROMATID_SEGREGATION	145	-0.691265	-2.96153	0	0	0	1011	tags=41%, list=10%, signal=44%
GOBP_RECOMBINATIONAL_REPAIR	112	-0.727389	-2.94899	0	0	0	1231	tags=51%, list=12%, signal=57%
GOBP_NUCLEAR_CHROMOSOME_SEGREGATION	204	-0.662317	-2.94511	0	0	0	1141	tags=39%, list=11%, signal=43%
GOCC_CHROMOSOME_CENTROMERIC_REGION	171	-0.680243	-2.94493	0	0	0	1488	tags=46%, list=14%, signal=52%
GOCC_CONDENSED_CHROMOSOME	164	-0.676156	-2.94	0	0	0	1488	tags=46%, list=14%, signal=52%
GOCC_CONDENSED_CHROMOSOME_CENTROMERIC_REGION	103	-0.724152	-2.92801	0	0	0	1011	tags=45%, list=10%, signal=49%
GOBP_SISTER_CHROMATID_SEGREGATION	168	-0.675572	-2.9124	0	0	0	1141	tags=40%, list=11%, signal=45%
GOCC_NUCLEAR_CHROMOSOME	184	-0.668777	-2.87822	0	0	0	1747	tags=48%, list=16%, signal=57%
GOCC_KINETOCHORE	122	-0.693923	-2.84058	0	0	0	1488	tags=46%, list=14%, signal=53%
GOCC_REPLICATION_FORK	58	-0.768956	-2.79643	0	0	0	1256	tags=59%, list=12%, signal=66%
GOBP_MITOTIC_NUCLEAR_DIVISION	244	-0.613705	-2.75588	0	0	0	1020	tags=34%, list=10%, signal=36%
GOBP_MEIOSIS_I_CELL_CYCLE_PROCESS	59	-0.759546	-2.74959	0	0	0	1421	tags=56%, list=13%, signal=64%
GOBP_CHROMOSOME_SEPARATION	77	-0.714888	-2.74118	0	0	0	1251	tags=49%, list=12%, signal=56%
GOBP_DNA_REPLICATION_INITIATION	36	-0.820808	-2.69712	0	0	0	907	tags=61%, list=9%, signal=67%
GOBP_DNA_CONFORMATION_CHANGE	237	-0.592741	-2.68399	0	0	0	1707	tags=41%, list=16%, signal=47%
GOBP_ORGANELLE_FISSION	345	-0.571175	-2.67949	0	0	0	1095	tags=32%, list=10%, signal=35%
GOBP_NEGATIVE_REGULATION_OF_CHROMOSOME_ORGANIZATION	80	-0.694991	-2.67678	0	0	0	1190	tags=39%, list=11%, signal=43%
GOBP_REGULATION_OF_CHROMOSOME_SEGREGATION	75	-0.692627	-2.66957	0	0	0	847	tags=41%, list=8%, signal=45%
GOBP_MITOTIC_CELL_CYCLE_CHECKPOINT	144	-0.629139	-2.65476	0	0	0	1560	tags=45%, list=15%, signal=52%
GOBP_REGULATION_OF_MITOTIC_SISTER_CHROMATID_SEGREGATION	40	-0.771749	-2.64865	0	0	0	769	tags=50%, list=7%, signal=54%
GOBP_CELL_CYCLE_CHECKPOINT	188	-0.606724	-2.64778	0	0	0	1560	tags=41%, list=15%, signal=47%
GOBP_METAPHASE_ANAPHASE_TRANSITION_OF_CELL_CYCLE	57	-0.717162	-2.64372	0	0	0	769	tags=44%, list=7%, signal=47%
GOBP_PROTEIN_LOCALIZATION_TO_CHROMOSOME	86	-0.679588	-2.64363	0	0	0	1476	tags=40%, list=14%, signal=46%
GOBP_REGULATION_OF_DNA_DEPENDENT_DNA_REPLICATION	44	-0.763983	-2.64182	0	0	0	526	tags=48%, list=5%, signal=50%
GOMF_CATALYTIC_ACTIVITY_ACTING_ON_DNA	166	-0.606399	-2.63044	0	0	0	1935	tags=46%, list=18%, signal=55%
GOBP_MEIOTIC_CELL_CYCLE_PROCESS	100	-0.652539	-2.62846	0	0	0	1247	tags=49%, list=12%, signal=55%
GOMF_DNA_REPLICATION_ORIGIN_BINDING	22	-0.876317	-2.62632	0	0	0	467	tags=59%, list=4%, signal=62%
GOBP_REGULATION_OF_DNA_RECOMBINATION	74	-0.680645	-2.61732	0	0	0	1256	tags=49%, list=12%, signal=55%
GOMF_SINGLE_STRANDED_DNA_HELICASE_ACTIVITY	18	-0.921395	-2.61434	0	0	0	467	tags=78%, list=4%, signal=81%
GOBP_MEIOTIC_CELL_CYCLE	133	-0.623916	-2.6088	0	0	0	1095	tags=43%, list=10%, signal=47%
GOBP_METAPHASE_PLATE_CONGRESSION	56	-0.698999	-2.60804	0	0	0	574	tags=34%, list=5%, signal=36%
GOBP_INTERSTRAND_CROSS_LINK_REPAIR	49	-0.741504	-2.60003	0	0	0	1159	tags=55%, list=11%, signal=62%
GOBP_DNA_PACKAGING	138	-0.61216	-2.59869	0	0	0	2107	tags=49%, list=20%, signal=60%
GOMF_DNA_HELICASE_ACTIVITY	66	-0.698289	-2.5967	0	0	0	467	tags=35%, list=4%, signal=36%
GOBP_REGULATION_OF_CHROMOSOME_SEPARATION	62	-0.707444	-2.59323	0	0	0	847	tags=44%, list=8%, signal=47%
GOMF_SINGLE_STRANDED_DNA_BINDING	98	-0.641294	-2.59148	0	0	0	1497	tags=44%, list=14%, signal=51%
GOBP_NEGATIVE_REGULATION_OF_METAPHASE_ANAPHASE_TRANSITION_OF_CELL_CYCLE	37	-0.776237	-2.58483	0	0	0	769	tags=51%, list=7%, signal=55%
GOCC_CHROMOSOME_TELOMERIC_REGION	128	-0.624248	-2.57973	0	0	0	1707	tags=40%, list=16%, signal=47%
GOBP_DNA_DEPENDENT_DNA_REPLICATION_MAINTENANCE_OF_FIDELITY	42	-0.76419	-2.57782	0	0	0	1256	tags=60%, list=12%, signal=67%
GOCC_CONDENSED_NUCLEAR_CHROMOSOME	55	-0.699225	-2.56235	0	0	0	1030	tags=45%, list=10%, signal=50%
GOBP_REPLICATION_FORK_PROCESSING	33	-0.794284	-2.55724	0	0	0	1421	tags=64%, list=13%, signal=73%
GOBP_REGULATION_OF_DOUBLE_STRAND_BREAK_REPAIR	70	-0.679041	-2.55506	0	0	0	1231	tags=44%, list=12%, signal=50%
GOBP_TELOMERE_ORGANIZATION	138	-0.600799	-2.549	0	0	0	2118	tags=43%, list=20%, signal=53%
GOCC_SPINDLE_POLE	141	-0.593333	-2.54828	0	0	0	1020	tags=30%, list=10%, signal=33%
GOBP_DNA_STRAND_ELONGATION_INVOLVED_IN_DNA_REPLICATION	18	-0.89056	-2.53226	0	0	0	1153	tags=94%, list=11%, signal=106%
GOBP_DNA_STRAND_ELONGATION	24	-0.852733	-2.53167	0	0	0	1190	tags=83%, list=11%, signal=94%
GOCC_PROTEIN_DNA_COMPLEX	106	-0.622296	-2.51785	0	0	0	1229	tags=42%, list=12%, signal=46%
GOBP_CENTROMERE_COMPLEX_ASSEMBLY	37	-0.754112	-2.5067	0	0	0	1081	tags=57%, list=10%, signal=63%
GOCC_DNA_PACKAGING_COMPLEX	35	-0.757541	-2.48152	0	0	0	1336	tags=63%, list=13%, signal=72%
GOBP_CHROMATIN_REMODELING_AT_CENTROMERE	28	-0.798581	-2.4791	0	0	0	1081	tags=64%, list=10%, signal=71%
GOBP_DNA_INTEGRITY_CHECKPOINT	145	-0.581363	-2.47767	0	0	0	1208	tags=34%, list=11%, signal=38%
GOBP_PROTEIN_DNA_COMPLEX_SUBUNIT_ORGANIZATION	181	-0.568974	-2.47291	0	0	0	1707	tags=36%, list=16%, signal=43%
GOBP_NUCLEOSOME_ASSEMBLY	64	-0.669489	-2.46502	0	0	0	2320	tags=61%, list=22%, signal=78%
GOBP_TELOMERE_MAINTENANCE_VIA_SEMI_CONSERVATIVE_REPLICATION	26	-0.821214	-2.4586	0	0	0	1153	tags=77%, list=11%, signal=86%
GOBP_HOMOLOGOUS_RECOMBINATION	31	-0.766112	-2.45262	0	0	0	1421	tags=55%, list=13%, signal=63%
GOBP_MEIOTIC_CHROMOSOME_SEGREGATION	44	-0.718009	-2.44606	0	0	0	1247	tags=55%, list=12%, signal=62%
GOBP_MITOTIC_SPINDLE_ORGANIZATION	103	-0.605793	-2.4414	0	0	0	1394	tags=37%, list=13%, signal=42%
GOCC_MITOTIC_SPINDLE	129	-0.581525	-2.43934	0	0	0	1130	tags=34%, list=11%, signal=38%
GOBP_MITOTIC_METAPHASE_PLATE_CONGRESSION	46	-0.691748	-2.43667	0	0	0	394	tags=30%, list=4%, signal=31%
GOBP_CHROMATIN_ASSEMBLY_OR_DISASSEMBLY	129	-0.583425	-2.43035	0	0	0	2320	tags=49%, list=22%, signal=62%
GOBP_DNA_REPLICATION_INDEPENDENT_NUCLEOSOME_ORGANIZATION	34	-0.75114	-2.42406	0	0	0	1081	tags=53%, list=10%, signal=59%
GOBP_NUCLEOSOME_ORGANIZATION	95	-0.607273	-2.42198	0	0	0	2375	tags=51%, list=22%, signal=65%
GOBP_NEGATIVE_REGULATION_OF_NUCLEAR_DIVISION	45	-0.704162	-2.42116	0	0	0	1141	tags=49%, list=11%, signal=55%
GOBP_REGULATION_OF_DOUBLE_STRAND_BREAK_REPAIR_VIA_HOMOLOGOUS_RECOMBINATION	36	-0.731846	-2.41179	0	0	0	1231	tags=53%, list=12%, signal=59%
GOBP_CHROMOSOME_LOCALIZATION	67	-0.636232	-2.41114	0	0	0	574	tags=30%, list=5%, signal=31%
GOCC_SPINDLE	320	-0.518239	-2.39856	0	0	0	1141	tags=28%, list=11%, signal=30%
GOCC_NUCLEAR_REPLICATION_FORK	31	-0.767928	-2.398	0	0	0	1256	tags=61%, list=12%, signal=69%
GOCC_SPINDLE_MICROTUBULE	63	-0.640888	-2.3971	0	0	0	758	tags=33%, list=7%, signal=36%
GOBP_MICROTUBULE_CYTOSKELETON_ORGANIZATION_INVOLVED_IN_MITOSIS	124	-0.570806	-2.39266	0	0	0	1394	tags=35%, list=13%, signal=40%
GOBP_CHROMOSOME_ORGANIZATION_INVOLVED_IN_MEIOTIC_CELL_CYCLE	31	-0.760564	-2.38921	0	0	0	1421	tags=61%, list=13%, signal=71%
GOBP_SPINDLE_ORGANIZATION	158	-0.559567	-2.38688	0	0	0	1816	tags=41%, list=17%, signal=49%
GOBP_SISTER_CHROMATID_COHESION	49	-0.680775	-2.38572	0	0	0	2059	tags=57%, list=19%, signal=71%
GOCC_DNA_REPLICATION_PREINITIATION_COMPLEX	12	-0.950457	-2.38514	0	0	0	528	tags=92%, list=5%, signal=96%
GOBP_ATTACHMENT_OF_SPINDLE_MICROTUBULES_TO_KINETOCHORE	31	-0.733525	-2.35652	0	0	0	399	tags=42%, list=4%, signal=43%
GOMF_DNA_DEPENDENT_ATPASE_ACTIVITY	44	-0.700126	-2.35118	0	0	0	1041	tags=43%, list=10%, signal=48%
GOBP_REGULATION_OF_MITOTIC_NUCLEAR_DIVISION	80	-0.601599	-2.35039	0	0	0	769	tags=34%, list=7%, signal=36%
GOBP_SPINDLE_ASSEMBLY	100	-0.582952	-2.34712	0	0	0	1807	tags=42%, list=17%, signal=50%
GOBP_DNA_REPLICATION_CHECKPOINT	15	-0.864515	-2.32784	0	0	0	605	tags=67%, list=6%, signal=71%
GOBP_CHROMOSOME_CONDENSATION	30	-0.733377	-2.32254	0	0	0	1095	tags=53%, list=10%, signal=59%
GOBP_REGULATION_OF_CELL_CYCLE_G2_M_PHASE_TRANSITION	196	-0.53315	-2.32172	0	0	0	1516	tags=33%, list=14%, signal=38%
GOBP_NEGATIVE_REGULATION_OF_DNA_RECOMBINATION	29	-0.74539	-2.31898	0	0	0	1256	tags=55%, list=12%, signal=62%
GOBP_DOUBLE_STRAND_BREAK_REPAIR_VIA_BREAK_INDUCED_REPLICATION	11	-0.951078	-2.31881	0	0	0	467	tags=91%, list=4%, signal=95%
GOBP_DNA_GEOMETRIC_CHANGE	103	-0.582616	-2.31729	0	0	0	1497	tags=36%, list=14%, signal=41%
GOBP_REGULATION_OF_DNA_REPLICATION	91	-0.585152	-2.31392	0	0	0	636	tags=29%, list=6%, signal=30%
GOBP_MITOTIC_DNA_INTEGRITY_CHECKPOINT	98	-0.582132	-2.31341	0	0	0	1560	tags=41%, list=15%, signal=47%
GOBP_POSTREPLICATION_REPAIR	48	-0.656295	-2.31025	0	0	0	1385	tags=44%, list=13%, signal=50%
GOCC_RIBOSOMAL_SUBUNIT	175	-0.522838	-2.30911	0	0	0	3338	tags=61%, list=31%, signal=88%
GOBP_DNA_SYNTHESIS_INVOLVED_IN_DNA_REPAIR	46	-0.665785	-2.30629	0	0	0	1385	tags=48%, list=13%, signal=55%
GOBP_REGULATION_OF_CYTOKINESIS	66	-0.609972	-2.30118	0	8.74247e-06	0.001	576	tags=32%, list=5%, signal=33%
GOMF_HELICASE_ACTIVITY	139	-0.548881	-2.28261	0	8.65234e-06	0.001	906	tags=24%, list=9%, signal=26%
GOBP_HISTONE_EXCHANGE	34	-0.709807	-2.28194	0	8.56405e-06	0.001	1331	tags=50%, list=13%, signal=57%
GOBP_CENTROSOME_DUPLICATION	62	-0.616048	-2.27598	0	1.69636e-05	0.002	1578	tags=47%, list=15%, signal=55%
GOMF_DAMAGED_DNA_BINDING	61	-0.62396	-2.27397	0	1.6794e-05	0.002	1293	tags=36%, list=12%, signal=41%
GOCC_CMG_COMPLEX	10	-0.951254	-2.27211	0	1.66277e-05	0.002	528	tags=100%, list=5%, signal=105%
GOBP_CELL_CYCLE_G2_M_PHASE_TRANSITION	244	-0.500556	-2.27058	0	1.64647e-05	0.002	1516	tags=32%, list=14%, signal=36%
GOCC_REPLISOME	21	-0.774832	-2.26729	0	2.43801e-05	0.003	1153	tags=67%, list=11%, signal=75%
GOBP_KINETOCHORE_ORGANIZATION	19	-0.800229	-2.26689	0	2.41457e-05	0.003	878	tags=58%, list=8%, signal=63%
GOBP_REGULATION_OF_DNA_METABOLIC_PROCESS	271	-0.491857	-2.26537	0	2.39158e-05	0.003	1679	tags=32%, list=16%, signal=37%
GOBP_NEGATIVE_REGULATION_OF_MITOTIC_CELL_CYCLE	260	-0.490667	-2.26036	0	2.36901e-05	0.003	1560	tags=31%, list=15%, signal=36%
GOBP_REGULATION_OF_DNA_REPAIR	108	-0.55614	-2.25083	0	2.34687e-05	0.003	1293	tags=35%, list=12%, signal=40%
GOBP_POSITIVE_REGULATION_OF_DOUBLE_STRAND_BREAK_REPAIR	34	-0.684469	-2.24887	0	3.09414e-05	0.004	1231	tags=50%, list=12%, signal=56%
GOCC_CONDENSED_NUCLEAR_CHROMOSOME_KINETOCHORE	16	-0.85001	-2.24287	0	3.84315e-05	0.005	640	tags=63%, list=6%, signal=66%
GOCC_CONDENSED_CHROMOSOME_OUTER_KINETOCHORE	13	-0.868164	-2.24235	0	3.80821e-05	0.005	631	tags=69%, list=6%, signal=74%
GOMF_DEOXYRIBONUCLEASE_ACTIVITY	47	-0.640799	-2.23768	0	3.77391e-05	0.005	2443	tags=62%, list=23%, signal=80%
GOCC_CYTOSOLIC_RIBOSOME	96	-0.550011	-2.23588	0	3.74021e-05	0.005	3540	tags=71%, list=33%, signal=105%
GOMF_STRUCTURAL_CONSTITUENT_OF_RIBOSOME	151	-0.521134	-2.23576	0	3.70711e-05	0.005	3856	tags=71%, list=36%, signal=110%
GOBP_PROTEIN_LOCALIZATION_TO_CHROMOSOME_CENTROMERIC_REGION	24	-0.744286	-2.23525	0	3.67459e-05	0.005	574	tags=46%, list=5%, signal=48%
GOBP_CENTRIOLE_ASSEMBLY	37	-0.663616	-2.23236	0	3.64264e-05	0.005	2361	tags=65%, list=22%, signal=83%
GOBP_MITOTIC_DNA_REPLICATION	15	-0.849612	-2.23026	0	4.33078e-05	0.006	528	tags=73%, list=5%, signal=77%
GOBP_NEGATIVE_REGULATION_OF_CELL_CYCLE_PHASE_TRANSITION	217	-0.503342	-2.22226	0	4.29376e-05	0.006	1208	tags=28%, list=11%, signal=31%
GOBP_REGULATION_OF_TRANSCRIPTION_INVOLVED_IN_G1_S_TRANSITION_OF_MITOTIC_CELL_CYCLE	30	-0.694813	-2.2208	0	4.25737e-05	0.006	309	tags=40%, list=3%, signal=41%
GOCC_LARGE_RIBOSOMAL_SUBUNIT	108	-0.545524	-2.22019	0	4.2216e-05	0.006	4169	tags=76%, list=39%, signal=124%
GOBP_FEMALE_MEIOTIC_NUCLEAR_DIVISION	20	-0.787052	-2.21928	0	4.18642e-05	0.006	1385	tags=65%, list=13%, signal=75%
GOBP_POSITIVE_REGULATION_OF_CYTOKINESIS	24	-0.752665	-2.21898	0	4.15182e-05	0.006	399	tags=42%, list=4%, signal=43%
GOCC_MCM_COMPLEX	11	-0.912024	-2.20944	0	5.45406e-05	0.008	469	tags=82%, list=4%, signal=86%
GOBP_REGULATION_OF_CHROMOSOME_ORGANIZATION	237	-0.488254	-2.19858	0	6.75747e-05	0.01	2118	tags=33%, list=20%, signal=40%
GOBP_NEGATIVE_REGULATION_OF_CELL_CYCLE_PROCESS	287	-0.477078	-2.19121	0	7.39334e-05	0.011	1075	tags=25%, list=10%, signal=27%
GOCC_MITOTIC_SPINDLE_POLE	30	-0.693803	-2.1876	0	7.33419e-05	0.011	1020	tags=40%, list=10%, signal=44%
GOCC_CENTRIOLE	116	-0.529124	-2.18567	0	7.27598e-05	0.011	2399	tags=49%, list=23%, signal=63%
GOBP_NUCLEIC_ACID_PHOSPHODIESTER_BOND_HYDROLYSIS	234	-0.482167	-2.18378	0	7.87788e-05	0.012	2722	tags=46%, list=26%, signal=60%
GOCC_SPINDLE_MIDZONE	32	-0.68361	-2.18258	0	8.45942e-05	0.013	758	tags=47%, list=7%, signal=50%
GOBP_MITOTIC_SPINDLE_ASSEMBLY	57	-0.595024	-2.17013	0	0.000115845	0.018	1371	tags=35%, list=13%, signal=40%
GOBP_CHROMATIN_ORGANIZATION_INVOLVED_IN_REGULATION_OF_TRANSCRIPTION	91	-0.557168	-2.16717	0	0.000121157	0.019	1832	tags=41%, list=17%, signal=49%
GOBP_SIGNAL_TRANSDUCTION_INVOLVED_IN_CELL_CYCLE_CHECKPOINT	69	-0.568211	-2.16713	0	0.000120233	0.019	1560	tags=38%, list=15%, signal=44%
GOBP_MICROTUBULE_ORGANIZING_CENTER_ORGANIZATION	118	-0.523459	-2.16474	0	0.000131918	0.021	1626	tags=37%, list=15%, signal=44%
GOBP_TRANSLESION_SYNTHESIS	39	-0.648676	-2.15677	0	0.000155937	0.025	1385	tags=46%, list=13%, signal=53%
GOBP_MRNA_EXPORT_FROM_NUCLEUS	103	-0.542022	-2.15257	0	0.000161059	0.026	2804	tags=49%, list=26%, signal=65%
GOBP_MITOCHONDRIAL_GENE_EXPRESSION	160	-0.502092	-2.1504	0	0.000165892	0.027	3451	tags=62%, list=33%, signal=90%
GOMF_EXONUCLEASE_ACTIVITY_ACTIVE_WITH_EITHER_RIBO_OR_DEOXYRIBONUCLEIC_ACIDS_AND_PRODUCING_5_PHOSPHOMONOESTERS	51	-0.608185	-2.14991	0	0.000164672	0.027	2329	tags=57%, list=22%, signal=72%
GOBP_CELL_CYCLE_G1_S_PHASE_TRANSITION	223	-0.488711	-2.14964	0	0.00016347	0.027	1075	tags=30%, list=10%, signal=33%
GOBP_NEGATIVE_REGULATION_OF_DNA_METABOLIC_PROCESS	90	-0.534269	-2.14695	0	0.00018006	0.03	1256	tags=29%, list=12%, signal=32%
GOBP_CHROMATIN_SILENCING	46	-0.61654	-2.13858	0	0.000184736	0.031	1739	tags=43%, list=16%, signal=52%
GOBP_HOMOLOGOUS_CHROMOSOME_SEGREGATION	24	-0.71123	-2.13844	0	0.000183417	0.031	1421	tags=50%, list=13%, signal=58%
GOBP_NEGATIVE_REGULATION_OF_GENE_EXPRESSION_EPIGENETIC	67	-0.573061	-2.13672	0	0.000187836	0.032	1739	tags=40%, list=16%, signal=48%
GOBP_PROTEIN_LOCALIZATION_TO_KINETOCHORE	18	-0.786016	-2.13506	0	0.000192563	0.033	1464	tags=67%, list=14%, signal=77%
GOBP_POSITIVE_REGULATION_OF_DNA_METABOLIC_PROCESS	158	-0.492697	-2.13284	0	0.000202806	0.035	1679	tags=35%, list=16%, signal=41%
GOBP_MITOTIC_G2_M_TRANSITION_CHECKPOINT	34	-0.650965	-2.13276	0	0.000201398	0.035	1421	tags=41%, list=13%, signal=47%
GOMF_EXODEOXYRIBONUCLEASE_ACTIVITY	17	-0.783716	-2.12588	0	0.000223219	0.039	1310	tags=65%, list=12%, signal=74%
GOCC_DNA_POLYMERASE_COMPLEX	20	-0.743155	-2.12383	0	0.00023311	0.04	1482	tags=75%, list=14%, signal=87%
GOBP_DEOXYRIBONUCLEOSIDE_TRIPHOSPHATE_METABOLIC_PROCESS	13	-0.828487	-2.11551	0	0.000265379	0.046	1547	tags=77%, list=15%, signal=90%
GOBP_RNA_EXPORT_FROM_NUCLEUS	127	-0.503558	-2.111	0	0.000285868	0.05	2900	tags=47%, list=27%, signal=64%
GOBP_POSITIVE_REGULATION_OF_CELL_CYCLE_PROCESS	212	-0.476839	-2.11051	0	0.00028949	0.051	1311	tags=31%, list=12%, signal=34%
GOCC_RIBOSOME	206	-0.479129	-2.10851	0	0.000304339	0.054	3856	tags=66%, list=36%, signal=102%
GOBP_RNA_3_END_PROCESSING	131	-0.501432	-2.1038	0	0.000340462	0.059	2758	tags=50%, list=26%, signal=66%
GOCC_CYTOSOLIC_LARGE_RIBOSOMAL_SUBUNIT	52	-0.590022	-2.09865	0	0.000370821	0.065	3856	tags=73%, list=36%, signal=114%
GOBP_REGULATION_OF_CELL_DIVISION	102	-0.524151	-2.09786	0	0.000368397	0.065	593	tags=26%, list=6%, signal=28%
GOMF_ENDONUCLEASE_ACTIVITY_ACTIVE_WITH_EITHER_RIBO_OR_DEOXYRIBONUCLEIC_ACIDS_AND_PRODUCING_5_PHOSPHOMONOESTERS	35	-0.628428	-2.09097	0.00259067	0.000403663	0.071	2636	tags=54%, list=25%, signal=72%
GOMF_4_IRON_4_SULFUR_CLUSTER_BINDING	39	-0.619233	-2.0884	0	0.000422556	0.075	2138	tags=44%, list=20%, signal=54%
GOBP_POSITIVE_REGULATION_OF_DNA_DEPENDENT_DNA_REPLICATION	10	-0.876383	-2.08763	0	0.000446457	0.08	526	tags=60%, list=5%, signal=63%
GOCC_METHYLTRANSFERASE_COMPLEX	91	-0.528574	-2.08548	0	0.000464961	0.083	3408	tags=65%, list=32%, signal=95%
GOBP_RRNA_METABOLIC_PROCESS	219	-0.470707	-2.08235	0	0.000472506	0.085	3281	tags=53%, list=31%, signal=76%
GOMF_DNA_SECONDARY_STRUCTURE_BINDING	27	-0.677861	-2.08147	0	0.000479939	0.087	1293	tags=56%, list=12%, signal=63%
GOCC_PRECATALYTIC_SPLICEOSOME	52	-0.580108	-2.07823	0	0.000497729	0.091	2765	tags=50%, list=26%, signal=67%
GOBP_CYTOKINESIS	132	-0.492109	-2.07527	0	0.000520082	0.096	576	tags=22%, list=5%, signal=23%
GOBP_NON_RECOMBINATIONAL_REPAIR	83	-0.527061	-2.07463	0	0.000522113	0.097	2067	tags=40%, list=19%, signal=49%
GOBP_REGULATION_OF_NUCLEAR_DIVISION	92	-0.532995	-2.07393	0	0.00051891	0.097	1141	tags=35%, list=11%, signal=39%
GOMF_NUCLEASE_ACTIVITY	153	-0.493072	-2.07388	0	0.000515746	0.097	2443	tags=44%, list=23%, signal=56%
GOBP_DNA_DOUBLE_STRAND_BREAK_PROCESSING	21	-0.711614	-2.07203	0	0.00051262	0.097	1714	tags=48%, list=16%, signal=57%
GOBP_MITOTIC_SISTER_CHROMATID_COHESION	24	-0.675801	-2.06705	0	0.000544772	0.103	2196	tags=54%, list=21%, signal=68%
GOBP_POSITIVE_REGULATION_OF_DNA_RECOMBINATION	32	-0.641855	-2.06636	0	0.000546475	0.104	1247	tags=50%, list=12%, signal=56%
GOBP_MEIOTIC_CHROMOSOME_SEPARATION	14	-0.782354	-2.05828	0	0.000636591	0.123	1247	tags=64%, list=12%, signal=73%
GOBP_NEGATIVE_REGULATION_OF_CHROMATIN_ORGANIZATION	45	-0.59455	-2.05451	0.00251256	0.000710618	0.139	1832	tags=40%, list=17%, signal=48%
GOBP_ATTACHMENT_OF_MITOTIC_SPINDLE_MICROTUBULES_TO_KINETOCHORE	14	-0.789206	-2.05085	0	0.000760316	0.15	228	tags=43%, list=2%, signal=44%
GOMF_MICROTUBULE_MOTOR_ACTIVITY	42	-0.595754	-2.05022	0	0.00076071	0.151	1146	tags=43%, list=11%, signal=48%
GOBP_DNA_BIOSYNTHETIC_PROCESS	160	-0.476897	-2.04664	0	0.000794456	0.157	1482	tags=32%, list=14%, signal=36%
GOBP_NUCLEOSIDE_SALVAGE	13	-0.778594	-2.0419	0	0.000847227	0.167	1332	tags=62%, list=13%, signal=70%
GOBP_SOMATIC_DIVERSIFICATION_OF_IMMUNE_RECEPTORS_VIA_SOMATIC_MUTATION	12	-0.816845	-2.04184	0.00217391	0.000842358	0.167	1247	tags=67%, list=12%, signal=75%
GOBP_DNA_UNWINDING_INVOLVED_IN_DNA_REPLICATION	15	-0.774782	-2.04089	0	0.000842288	0.168	900	tags=60%, list=8%, signal=65%
GOBP_MITOCHONDRIAL_TRANSLATION	130	-0.488225	-2.03619	0	0.000884621	0.178	3328	tags=58%, list=31%, signal=83%
GOBP_MITOTIC_NUCLEAR_ENVELOPE_DISASSEMBLY	11	-0.839582	-2.0329	0	0.00092122	0.185	901	tags=55%, list=8%, signal=60%
GOBP_GENE_SILENCING	183	-0.460938	-2.02641	0	0.00100903	0.201	2282	tags=34%, list=21%, signal=42%
GOBP_G2_DNA_DAMAGE_CHECKPOINT	33	-0.632911	-2.02435	0	0.00103112	0.205	1073	tags=36%, list=10%, signal=40%
GOBP_MITOTIC_CYTOKINESIS	62	-0.542193	-2.02327	0	0.00103902	0.208	734	tags=27%, list=7%, signal=29%
GOBP_FORMATION_OF_EXTRACHROMOSOMAL_CIRCULAR_DNA	13	-0.79669	-2.01645	0	0.00117004	0.229	107	tags=31%, list=1%, signal=31%
GOBP_RIBOSOME_BIOGENESIS	286	-0.440211	-2.01492	0	0.00118673	0.234	3494	tags=53%, list=33%, signal=78%
GOBP_ERROR_PRONE_TRANSLESION_SYNTHESIS	21	-0.705295	-2.01488	0	0.00118024	0.234	954	tags=52%, list=9%, signal=57%
GOBP_POSITIVE_REGULATION_OF_CELL_CYCLE_G2_M_PHASE_TRANSITION	25	-0.646949	-2.00975	0	0.00127302	0.253	526	tags=36%, list=5%, signal=38%
GOBP_CILIARY_BASAL_BODY_PLASMA_MEMBRANE_DOCKING	93	-0.512544	-2.00764	0	0.00128402	0.255	2363	tags=49%, list=22%, signal=63%
GOMF_ATP_DEPENDENT_MICROTUBULE_MOTOR_ACTIVITY_PLUS_END_DIRECTED	12	-0.802314	-2.006	0	0.00131715	0.261	250	tags=50%, list=2%, signal=51%
GOCC_SPLICEOSOMAL_COMPLEX	183	-0.463564	-2.00262	0	0.00138093	0.273	3835	tags=59%, list=36%, signal=91%
GOMF_STRUCTURAL_CONSTITUENT_OF_NUCLEAR_PORE	23	-0.673115	-2.00252	0	0.00137359	0.273	2045	tags=57%, list=19%, signal=70%
GOBP_BASE_EXCISION_REPAIR	36	-0.613932	-1.99545	0	0.00151484	0.295	2688	tags=67%, list=25%, signal=89%
GOCC_SYNAPTONEMAL_STRUCTURE	17	-0.709445	-1.99403	0.00464037	0.00153709	0.299	1247	tags=53%, list=12%, signal=60%
GOMF_DNA_POLYMERASE_BINDING	17	-0.73761	-1.99317	0	0.0015511	0.303	1765	tags=59%, list=17%, signal=70%
GOBP_SOMATIC_DIVERSIFICATION_OF_IMMUNE_RECEPTORS	54	-0.559384	-1.99118	0	0.00158598	0.309	1449	tags=39%, list=14%, signal=45%
GOBP_PROTEIN_LOCALIZATION_TO_CHROMATIN	27	-0.658683	-1.98961	0	0.0016077	0.314	2023	tags=44%, list=19%, signal=55%
GOCC_ORGANELLAR_RIBOSOME	84	-0.500959	-1.9888	0	0.00162942	0.32	4241	tags=75%, list=40%, signal=124%
GOBP_MITOCHONDRIAL_TRANSLATIONAL_TERMINATION	87	-0.503568	-1.98805	0	0.00163814	0.323	4362	tags=77%, list=41%, signal=130%
GOMF_HISTONE_KINASE_ACTIVITY	13	-0.792034	-1.98706	0	0.00164247	0.325	902	tags=54%, list=8%, signal=59%
GOBP_DNA_DAMAGE_RESPONSE_DETECTION_OF_DNA_DAMAGE	37	-0.589475	-1.98583	0	0.00165105	0.327	1153	tags=46%, list=11%, signal=51%
GOBP_MALE_MEIOTIC_NUCLEAR_DIVISION	18	-0.708183	-1.98578	0	0.00164271	0.327	1385	tags=56%, list=13%, signal=64%
GOBP_NUCLEAR_TRANSCRIBED_MRNA_CATABOLIC_PROCESS_NONSENSE_MEDIATED_DECAY	117	-0.485954	-1.98474	0	0.00163869	0.327	3540	tags=62%, list=33%, signal=93%
GOBP_MITOTIC_RECOMBINATION	21	-0.685518	-1.98452	0	0.0016389	0.328	2196	tags=57%, list=21%, signal=72%
GOMF_EXONUCLEASE_ACTIVITY	71	-0.526248	-1.98418	0	0.00164315	0.33	2329	tags=46%, list=22%, signal=59%
GOBP_RESPONSE_TO_HYDROXYUREA	11	-0.813401	-1.98347	0	0.00164329	0.332	1231	tags=55%, list=12%, signal=62%
GOBP_MISMATCH_REPAIR	25	-0.656372	-1.98153	0.00240385	0.00172475	0.347	1293	tags=52%, list=12%, signal=59%
GOBP_NEGATIVE_REGULATION_OF_CELL_DIVISION	12	-0.794102	-1.97489	0	0.00201105	0.401	279	tags=42%, list=3%, signal=43%
GOCC_SPLICEOSOMAL_TRI_SNRNP_COMPLEX	32	-0.611029	-1.97337	0	0.00204176	0.405	2717	tags=69%, list=26%, signal=92%
GOBP_REGULATION_OF_UBIQUITIN_PROTEIN_LIGASE_ACTIVITY	21	-0.680847	-1.97257	0	0.00206408	0.411	703	tags=33%, list=7%, signal=36%
GOMF_FOUR_WAY_JUNCTION_DNA_BINDING	14	-0.76398	-1.96712	0	0.00224524	0.435	1293	tags=64%, list=12%, signal=73%
GOCC_SITE_OF_DNA_DAMAGE	82	-0.501229	-1.96647	0	0.00225827	0.439	1181	tags=29%, list=11%, signal=33%
GOMF_HISTONE_BINDING	198	-0.440284	-1.96447	0	0.00230326	0.447	2320	tags=37%, list=22%, signal=47%
GOBP_HISTONE_PHOSPHORYLATION	32	-0.62056	-1.96426	0.00245098	0.00230024	0.447	902	tags=34%, list=8%, signal=37%
GOBP_REGULATION_OF_SIGNAL_TRANSDUCTION_BY_P53_CLASS_MEDIATOR	154	-0.461001	-1.96243	0	0.00235192	0.458	2390	tags=45%, list=23%, signal=58%
GOBP_NUCLEOTIDE_EXCISION_REPAIR_DNA_GAP_FILLING	23	-0.665672	-1.96072	0	0.00240377	0.467	1385	tags=61%, list=13%, signal=70%
GOBP_RNA_SPLICING_VIA_TRANSESTERIFICATION_REACTIONS	320	-0.421935	-1.96066	0	0.00239249	0.467	3954	tags=59%, list=37%, signal=91%
GOCC_SMALL_NUCLEAR_RIBONUCLEOPROTEIN_COMPLEX	67	-0.509482	-1.96057	0	0.00238131	0.467	3521	tags=64%, list=33%, signal=95%
GOBP_GLYCOSYL_COMPOUND_BIOSYNTHETIC_PROCESS	35	-0.600721	-1.9591	0	0.00240479	0.469	2292	tags=60%, list=22%, signal=76%
GOBP_DEOXYRIBONUCLEOTIDE_METABOLIC_PROCESS	31	-0.624557	-1.95728	0	0.00247006	0.478	2053	tags=55%, list=19%, signal=68%
GOBP_REGULATION_OF_GENE_SILENCING	96	-0.487314	-1.95705	0	0.00245867	0.478	2096	tags=34%, list=20%, signal=42%
GOCC_HETEROCHROMATIN	64	-0.527921	-1.95381	0	0.00257264	0.495	1707	tags=34%, list=16%, signal=41%
GOMF_3_5_DNA_HELICASE_ACTIVITY	16	-0.732131	-1.94876	0	0.0027387	0.52	898	tags=44%, list=8%, signal=48%
GOBP_POSITIVE_REGULATION_OF_CELL_CYCLE_PHASE_TRANSITION	74	-0.510724	-1.94613	0	0.00283888	0.534	526	tags=23%, list=5%, signal=24%
GOBP_PYRIMIDINE_CONTAINING_COMPOUND_BIOSYNTHETIC_PROCESS	30	-0.602736	-1.94593	0	0.00284116	0.538	2292	tags=53%, list=22%, signal=68%
GOBP_INTRA_S_DNA_DAMAGE_CHECKPOINT	15	-0.739194	-1.94257	0	0.0029445	0.547	1421	tags=53%, list=13%, signal=61%
GOBP_REGULATION_OF_CYCLIN_DEPENDENT_PROTEIN_KINASE_ACTIVITY	76	-0.508062	-1.94246	0	0.0029313	0.547	1075	tags=30%, list=10%, signal=33%
GOCC_SMALL_RIBOSOMAL_SUBUNIT	69	-0.524863	-1.94222	0.00288184	0.00292198	0.548	3281	tags=67%, list=31%, signal=96%
GOCC_CATALYTIC_STEP_2_SPLICEOSOME	86	-0.4989	-1.94126	0	0.00295345	0.557	2845	tags=48%, list=27%, signal=65%
GOCC_PERICENTRIC_HETEROCHROMATIN	18	-0.7011	-1.9409	0	0.00296966	0.561	2260	tags=72%, list=21%, signal=92%
GOCC_KINESIN_COMPLEX	36	-0.590615	-1.9368	0	0.00318333	0.587	253	tags=31%, list=2%, signal=31%
GOBP_NEGATIVE_REGULATION_OF_HISTONE_METHYLATION	18	-0.69807	-1.93651	0	0.0031838	0.587	1707	tags=50%, list=16%, signal=59%
GOBP_MRNA_3_END_PROCESSING	92	-0.491097	-1.93551	0	0.00322023	0.594	2758	tags=47%, list=26%, signal=63%
GOBP_SIGNAL_TRANSDUCTION_BY_P53_CLASS_MEDIATOR	227	-0.432579	-1.93479	0	0.00323868	0.597	1730	tags=33%, list=16%, signal=39%
GOBP_REGULATION_OF_CELL_CYCLE_CHECKPOINT	29	-0.608026	-1.93461	0	0.00323549	0.597	2356	tags=55%, list=22%, signal=71%
GOCC_CHROMOCENTER	11	-0.780597	-1.93196	0.00220751	0.00332831	0.604	753	tags=45%, list=7%, signal=49%
GOBP_POSITIVE_REGULATION_OF_CELL_CYCLE	278	-0.417125	-1.92961	0	0.00343832	0.621	1526	tags=29%, list=14%, signal=34%
GOBP_ERROR_FREE_TRANSLESION_SYNTHESIS	22	-0.645917	-1.9286	0	0.00348718	0.634	900	tags=41%, list=8%, signal=45%
GOBP_MITOTIC_CHROMOSOME_CONDENSATION	14	-0.727911	-1.92631	0.00445434	0.00360603	0.647	1744	tags=71%, list=16%, signal=85%
GOBP_NEGATIVE_REGULATION_OF_DOUBLE_STRAND_BREAK_REPAIR_VIA_HOMOLOGOUS_RECOMBINATION	14	-0.749263	-1.92581	0	0.00362243	0.65	1181	tags=57%, list=11%, signal=64%
GOMF_5_3_EXONUCLEASE_ACTIVITY	18	-0.698244	-1.92336	0	0.00374684	0.661	1421	tags=44%, list=13%, signal=51%
GOMF_ENDODEOXYRIBONUCLEASE_ACTIVITY	33	-0.596551	-1.92064	0	0.00389424	0.678	2443	tags=58%, list=23%, signal=75%
GOBP_MITOTIC_G2_DNA_DAMAGE_CHECKPOINT	22	-0.648533	-1.91792	0	0.00401313	0.689	1421	tags=41%, list=13%, signal=47%
GOBP_REGULATION_OF_CENTROSOME_CYCLE	42	-0.561935	-1.91783	0	0.00400342	0.689	2133	tags=45%, list=20%, signal=56%
GOMF_ENDODEOXYRIBONUCLEASE_ACTIVITY_PRODUCING_5_PHOSPHOMONOESTERS	14	-0.733358	-1.91702	0	0.00403141	0.694	983	tags=50%, list=9%, signal=55%
GOCC_PRONUCLEUS	10	-0.807204	-1.91457	0	0.0041833	0.712	145	tags=40%, list=1%, signal=41%
GOBP_REGULATION_OF_RESPONSE_TO_DNA_DAMAGE_STIMULUS	186	-0.433436	-1.90836	0	0.00452067	0.736	1679	tags=32%, list=16%, signal=38%
GOBP_TELOMERE_MAINTENANCE_VIA_TELOMERE_LENGTHENING	71	-0.504956	-1.90786	0	0.00452937	0.739	2927	tags=42%, list=28%, signal=58%
GOBP_ANAPHASE_PROMOTING_COMPLEX_DEPENDENT_CATABOLIC_PROCESS	77	-0.500334	-1.9068	0	0.00456829	0.746	394	tags=17%, list=4%, signal=17%
GOBP_TRNA_TRANSPORT	36	-0.57879	-1.90454	0	0.00470453	0.759	2900	tags=58%, list=27%, signal=80%
GOBP_NCRNA_EXPORT_FROM_NUCLEUS	38	-0.564204	-1.90422	0	0.00471236	0.761	2900	tags=53%, list=27%, signal=72%
GOBP_MITOTIC_G1_S_TRANSITION_CHECKPOINT	58	-0.535193	-1.90263	0	0.00479638	0.771	1560	tags=40%, list=15%, signal=46%
GOCC_HISTONE_METHYLTRANSFERASE_COMPLEX	63	-0.514758	-1.89829	0	0.0050195	0.791	2788	tags=56%, list=26%, signal=75%
GOBP_REGULATION_OF_ATTACHMENT_OF_SPINDLE_MICROTUBULES_TO_KINETOCHORE	13	-0.745572	-1.89436	0	0.00525807	0.801	399	tags=54%, list=4%, signal=56%
GOBP_HOMOLOGOUS_CHROMOSOME_PAIRING_AT_MEIOSIS	17	-0.690089	-1.891	0	0.00549721	0.812	1958	tags=59%, list=18%, signal=72%
GOBP_NEGATIVE_REGULATION_OF_CELL_CYCLE_G2_M_PHASE_TRANSITION	99	-0.471444	-1.88961	0	0.00559675	0.82	1516	tags=24%, list=14%, signal=28%
GOBP_REGULATION_OF_SPINDLE_CHECKPOINT	14	-0.735087	-1.8886	0.00448431	0.00565932	0.824	567	tags=43%, list=5%, signal=45%
GOCC_MITOCHONDRIAL_LARGE_RIBOSOMAL_SUBUNIT	55	-0.515298	-1.88607	0	0.00582971	0.838	4241	tags=78%, list=40%, signal=130%
GOBP_RESOLUTION_OF_MEIOTIC_RECOMBINATION_INTERMEDIATES	10	-0.791093	-1.88561	0.0021322	0.00582647	0.838	1247	tags=60%, list=12%, signal=68%
GOBP_CYTOSKELETON_DEPENDENT_CYTOKINESIS	80	-0.488345	-1.88472	0	0.00587152	0.845	734	tags=23%, list=7%, signal=24%
GOMF_G_QUADRUPLEX_DNA_BINDING	10	-0.795792	-1.88432	0.00215054	0.00587785	0.846	281	tags=30%, list=3%, signal=31%
GOBP_REGULATION_OF_CHROMATIN_SILENCING	11	-0.79291	-1.8835	0.00234192	0.00595437	0.851	571	tags=45%, list=5%, signal=48%
GOBP_REGULATION_OF_SISTER_CHROMATID_COHESION	22	-0.641555	-1.88189	0	0.00605907	0.861	2196	tags=55%, list=21%, signal=69%
GOBP_POSITIVE_REGULATION_OF_DNA_REPAIR	62	-0.520552	-1.88107	0	0.00610578	0.863	1293	tags=35%, list=12%, signal=40%
GOBP_NEGATIVE_REGULATION_OF_DNA_DEPENDENT_DNA_REPLICATION	17	-0.700208	-1.87835	0	0.00628251	0.873	1256	tags=53%, list=12%, signal=60%
GOCC_SITE_OF_DOUBLE_STRAND_BREAK	61	-0.509665	-1.87593	0	0.00650846	0.88	1181	tags=31%, list=11%, signal=35%
GOBP_VIRAL_GENE_EXPRESSION	186	-0.423145	-1.87323	0	0.00670096	0.894	3215	tags=49%, list=30%, signal=69%
GOBP_POSITIVE_REGULATION_OF_DNA_BIOSYNTHETIC_PROCESS	55	-0.520021	-1.87116	0	0.00687328	0.902	1476	tags=33%, list=14%, signal=38%
GOBP_NEGATIVE_REGULATION_OF_DNA_REPLICATION	29	-0.585639	-1.86761	0.00260417	0.0072058	0.91	471	tags=28%, list=4%, signal=29%
GOBP_NEGATIVE_REGULATION_OF_CELL_CYCLE_G1_S_PHASE_TRANSITION	89	-0.47379	-1.86342	0	0.00759613	0.921	1075	tags=30%, list=10%, signal=33%
GOBP_MEMBRANE_DISASSEMBLY	14	-0.721803	-1.86318	0.00224719	0.0075894	0.922	901	tags=43%, list=8%, signal=47%
GOBP_TERMINATION_OF_RNA_POLYMERASE_II_TRANSCRIPTION	35	-0.565671	-1.86301	0	0.00758281	0.922	3022	tags=57%, list=28%, signal=80%
GOBP_ATP_DEPENDENT_CHROMATIN_REMODELING	62	-0.505572	-1.86219	0	0.00761282	0.922	2107	tags=39%, list=20%, signal=48%
GOBP_MRNA_TRANSPORT	134	-0.443685	-1.86122	0	0.00766732	0.923	3022	tags=48%, list=28%, signal=66%
GOBP_DEOXYRIBONUCLEOTIDE_BIOSYNTHETIC_PROCESS	12	-0.765877	-1.85723	0	0.00799373	0.928	1180	tags=58%, list=11%, signal=66%
GOBP_NUCLEOTIDE_EXCISION_REPAIR	102	-0.462931	-1.85719	0	0.00796744	0.928	2641	tags=42%, list=25%, signal=56%
GOBP_KINETOCHORE_ASSEMBLY	14	-0.714274	-1.85231	0	0.00842889	0.939	873	tags=43%, list=8%, signal=47%
GOBP_MULTICELLULAR_ORGANISM_AGING	18	-0.651806	-1.85229	0.00222222	0.00839813	0.939	1218	tags=39%, list=11%, signal=44%
GOBP_REGULATION_OF_DNA_BIOSYNTHETIC_PROCESS	89	-0.469045	-1.85184	0	0.00841873	0.942	2118	tags=34%, list=20%, signal=42%
GOMF_NUCLEOSOME_BINDING	59	-0.511484	-1.85151	0	0.0084214	0.943	2230	tags=41%, list=21%, signal=51%
GOBP_REGULATION_OF_NUCLEASE_ACTIVITY	20	-0.648002	-1.84887	0	0.00866957	0.948	2414	tags=50%, list=23%, signal=65%
GOMF_METHYLATED_HISTONE_BINDING	62	-0.502728	-1.84737	0	0.00882675	0.952	1320	tags=32%, list=12%, signal=37%
GOCC_U12_TYPE_SPLICEOSOMAL_COMPLEX	26	-0.601906	-1.84695	0.00243309	0.00883975	0.953	3766	tags=73%, list=35%, signal=113%
GOBP_POSITIVE_REGULATION_OF_CHROMOSOME_SEGREGATION	13	-0.712323	-1.84601	0.00879121	0.00888506	0.955	394	tags=38%, list=4%, signal=40%
GOBP_POSITIVE_REGULATION_OF_VIRAL_GENOME_REPLICATION	27	-0.598064	-1.84142	0	0.00940268	0.961	1928	tags=30%, list=18%, signal=36%
GOBP_SPLICEOSOMAL_COMPLEX_ASSEMBLY	51	-0.519613	-1.83921	0	0.00959556	0.963	2938	tags=57%, list=28%, signal=78%
GOBP_SOMATIC_DIVERSIFICATION_OF_IMMUNOGLOBULINS	47	-0.532709	-1.83809	0	0.00969862	0.966	1449	tags=38%, list=14%, signal=44%
GOBP_COTRANSLATIONAL_PROTEIN_TARGETING_TO_MEMBRANE	97	-0.457318	-1.83758	0	0.00973149	0.966	3338	tags=61%, list=31%, signal=88%
GOBP_NEGATIVE_REGULATION_OF_HISTONE_MODIFICATION	36	-0.553811	-1.83707	0	0.00976154	0.967	1739	tags=36%, list=16%, signal=43%
GOBP_REGULATION_OF_TELOMERASE_ACTIVITY	40	-0.546786	-1.83575	0.0026738	0.00988033	0.967	2826	tags=50%, list=27%, signal=68%
GOBP_POSITIVE_REGULATION_OF_DNA_REPLICATION	30	-0.571815	-1.83193	0.00253807	0.0103276	0.973	526	tags=27%, list=5%, signal=28%
GOCC_MICROTUBULE_ASSOCIATED_COMPLEX	105	-0.448361	-1.83061	0	0.0104845	0.975	1066	tags=25%, list=10%, signal=27%
GOMF_POLY_A_SPECIFIC_RIBONUCLEASE_ACTIVITY	12	-0.735308	-1.82525	0.0046083	0.011111	0.981	1518	tags=42%, list=14%, signal=49%
GOBP_MRNA_SPLICE_SITE_SELECTION	26	-0.600511	-1.82436	0	0.0111778	0.982	2938	tags=69%, list=28%, signal=95%
GOBP_DEOXYRIBONUCLEOSIDE_MONOPHOSPHATE_METABOLIC_PROCESS	12	-0.735714	-1.82148	0.00218818	0.0115003	0.982	1232	tags=50%, list=12%, signal=57%
GOCC_MITOCHONDRIAL_SMALL_RIBOSOMAL_SUBUNIT	28	-0.57939	-1.82075	0.00722892	0.0115345	0.984	2421	tags=54%, list=23%, signal=69%
GOCC_MIDBODY	165	-0.425152	-1.82008	0	0.0115858	0.985	694	tags=17%, list=7%, signal=18%
GOMF_ATP_DEPENDENT_MICROTUBULE_MOTOR_ACTIVITY	18	-0.65645	-1.81344	0	0.0124209	0.988	250	tags=33%, list=2%, signal=34%
GOCC_CYTOSOLIC_SMALL_RIBOSOMAL_SUBUNIT	41	-0.537035	-1.81134	0	0.0126985	0.989	3281	tags=76%, list=31%, signal=109%
GOBP_RNA_PHOSPHODIESTER_BOND_HYDROLYSIS	124	-0.43699	-1.81003	0	0.0128456	0.989	3095	tags=48%, list=29%, signal=68%
GOMF_TELOMERIC_DNA_BINDING	34	-0.563594	-1.80998	0	0.0128023	0.989	1637	tags=32%, list=15%, signal=38%
GOBP_ESTABLISHMENT_OF_PROTEIN_LOCALIZATION_TO_CHROMOSOME	25	-0.592211	-1.80907	0.00454545	0.0129287	0.99	1944	tags=40%, list=18%, signal=49%
GOBP_NUCLEOBASE_BIOSYNTHETIC_PROCESS	18	-0.652117	-1.80887	0.00224215	0.012916	0.99	2142	tags=56%, list=20%, signal=69%
GOBP_NUCLEOTIDE_EXCISION_REPAIR_DNA_INCISION	37	-0.545924	-1.80582	0.00276243	0.0133702	0.992	2534	tags=57%, list=24%, signal=74%
GOCC_U2_TYPE_SPLICEOSOMAL_COMPLEX	91	-0.453216	-1.80566	0	0.0133478	0.992	3827	tags=58%, list=36%, signal=90%
GOBP_TELOMERE_CAPPING	36	-0.551922	-1.80155	0.00239234	0.013863	0.995	2494	tags=42%, list=23%, signal=54%
GOBP_TRANSLATIONAL_ELONGATION	124	-0.433549	-1.80131	0	0.0138747	0.996	4244	tags=68%, list=40%, signal=112%
GOCC_METHYLOSOME	12	-0.731107	-1.79885	0.00455581	0.0141717	0.997	2007	tags=75%, list=19%, signal=92%
GOBP_EXIT_FROM_MITOSIS	24	-0.608452	-1.7984	0	0.0141738	0.997	741	tags=25%, list=7%, signal=27%
GOBP_OOCYTE_MATURATION	17	-0.670565	-1.79745	0.0023753	0.0142925	0.997	462	tags=41%, list=4%, signal=43%
GOCC_GERM_CELL_NUCLEUS	12	-0.732884	-1.79559	0.00235294	0.0145502	0.997	1247	tags=50%, list=12%, signal=57%
GOMF_MICROTUBULE_BINDING	192	-0.409859	-1.79557	0	0.0145056	0.997	1146	tags=24%, list=11%, signal=27%
GOBP_CHROMATIN_REMODELING	150	-0.420764	-1.79474	0	0.0145895	0.997	2123	tags=33%, list=20%, signal=41%
GOBP_HAIR_CELL_DIFFERENTIATION	19	-0.637546	-1.79425	0.00238663	0.0146464	0.997	1116	tags=42%, list=11%, signal=47%
GOBP_MATURATION_OF_5_8S_RRNA	34	-0.551852	-1.79353	0	0.0147032	0.997	2757	tags=53%, list=26%, signal=71%
GOBP_REGULATION_OF_GENE_EXPRESSION_EPIGENETIC	135	-0.428381	-1.79189	0	0.014939	0.997	2123	tags=33%, list=20%, signal=41%
GOBP_INNER_CELL_MASS_CELL_PROLIFERATION	12	-0.70571	-1.79173	0.0070922	0.0149097	0.997	610	tags=42%, list=6%, signal=44%
GOBP_NCRNA_3_END_PROCESSING	37	-0.539774	-1.79089	0	0.0149962	0.997	2518	tags=51%, list=24%, signal=67%
GOBP_NUCLEOSIDE_MONOPHOSPHATE_BIOSYNTHETIC_PROCESS	38	-0.536868	-1.78989	0	0.0151272	0.997	1363	tags=45%, list=13%, signal=51%
GOBP_REGULATION_OF_CENTRIOLE_REPLICATION	18	-0.641385	-1.78841	0.00448431	0.0153358	0.997	2361	tags=67%, list=22%, signal=86%
GOBP_MITOCHONDRIAL_RNA_METABOLIC_PROCESS	46	-0.51688	-1.78773	0	0.0153921	0.997	3242	tags=67%, list=31%, signal=97%
GOBP_RNA_METHYLATION	75	-0.458189	-1.78742	0	0.015414	0.997	3190	tags=52%, list=30%, signal=74%
GOBP_RNA_MODIFICATION	144	-0.42212	-1.78547	0	0.0156899	0.997	3265	tags=49%, list=31%, signal=70%
GOBP_POSITIVE_REGULATION_OF_TELOMERASE_ACTIVITY	28	-0.571552	-1.78463	0.00681818	0.0158093	0.997	2494	tags=46%, list=23%, signal=61%
GOMF_3_5_EXONUCLEASE_ACTIVITY	49	-0.511782	-1.78292	0	0.0160538	0.997	2757	tags=55%, list=26%, signal=74%
GOBP_DETERMINATION_OF_ADULT_LIFESPAN	12	-0.716386	-1.78265	0.00636943	0.016053	0.997	1218	tags=50%, list=11%, signal=56%
GOBP_MEIOTIC_SPINDLE_ORGANIZATION	10	-0.76077	-1.78236	0.00659341	0.016062	0.997	292	tags=40%, list=3%, signal=41%
GOCC_SNO_S_RNA_CONTAINING_RIBONUCLEOPROTEIN_COMPLEX	22	-0.609222	-1.78082	0.00465116	0.016311	0.997	2669	tags=59%, list=25%, signal=79%
GOBP_REGULATION_OF_SPINDLE_ORGANIZATION	35	-0.539673	-1.78055	0	0.0162939	0.997	642	tags=26%, list=6%, signal=27%
GOBP_NUCLEAR_ENVELOPE_ORGANIZATION	48	-0.510601	-1.77987	0	0.0163787	0.998	1286	tags=25%, list=12%, signal=28%
GOBP_PYRIMIDINE_NUCLEOTIDE_BIOSYNTHETIC_PROCESS	23	-0.607686	-1.7793	0	0.0164375	0.998	2292	tags=57%, list=22%, signal=72%
GOBP_SPLICEOSOMAL_SNRNP_ASSEMBLY	37	-0.533991	-1.77922	0.00249377	0.0163925	0.998	2879	tags=62%, list=27%, signal=85%
GOBP_SIGNAL_TRANSDUCTION_IN_RESPONSE_TO_DNA_DAMAGE	116	-0.434445	-1.77567	0	0.0170004	0.998	1075	tags=25%, list=10%, signal=28%
GOMF_ATPASE_ACTIVITY	347	-0.37747	-1.77416	0	0.0172173	0.999	1041	tags=19%, list=10%, signal=20%
GOMF_DNA_POLYMERASE_ACTIVITY	27	-0.578949	-1.77184	0	0.0176026	0.999	1482	tags=41%, list=14%, signal=47%
GOBP_REGULATION_OF_NUCLEAR_CELL_CYCLE_DNA_REPLICATION	11	-0.743476	-1.77047	0.00688073	0.0178212	0.999	1208	tags=55%, list=11%, signal=61%
GOMF_NUCLEOSOMAL_DNA_BINDING	30	-0.562939	-1.76746	0.00250627	0.0184211	0.999	2066	tags=47%, list=19%, signal=58%
GOBP_NUCLEAR_TRANSCRIBED_MRNA_CATABOLIC_PROCESS	199	-0.397787	-1.76742	0	0.0183734	0.999	3215	tags=49%, list=30%, signal=69%
GOBP_REGULATION_OF_MITOCHONDRIAL_GENE_EXPRESSION	28	-0.567376	-1.76719	0.00505051	0.0183852	0.999	3061	tags=61%, list=29%, signal=85%
GOCC_MITOTIC_SPINDLE_MIDZONE	12	-0.72303	-1.765	0	0.0187813	0.999	257	tags=50%, list=2%, signal=51%
GOBP_NUCLEAR_EXPORT	180	-0.402686	-1.76357	0.00357143	0.0190056	0.999	2900	tags=41%, list=27%, signal=55%
GOCC_MITOCHONDRIAL_PROTEIN_CONTAINING_COMPLEX	243	-0.387868	-1.76169	0	0.0193555	0.999	4205	tags=63%, list=40%, signal=102%
GOBP_DEOXYRIBOSE_PHOSPHATE_CATABOLIC_PROCESS	21	-0.601002	-1.76084	0.00692841	0.0194665	0.999	2053	tags=57%, list=19%, signal=71%
GOCC_SM_LIKE_PROTEIN_FAMILY_COMPLEX	78	-0.453447	-1.76071	0	0.0194311	0.999	3521	tags=62%, list=33%, signal=91%
GOMF_OXIDIZED_DNA_BINDING	10	-0.751344	-1.76011	0.00452489	0.0194925	0.999	2414	tags=80%, list=23%, signal=103%
GOBP_MITOCHONDRIAL_RNA_PROCESSING	17	-0.643588	-1.75933	0.00447427	0.0196053	0.999	3423	tags=94%, list=32%, signal=139%
GOMF_ENDONUCLEASE_ACTIVITY	87	-0.445552	-1.75931	0	0.0195482	0.999	2494	tags=41%, list=23%, signal=54%
GOBP_POSITIVE_REGULATION_OF_ISOTYPE_SWITCHING	18	-0.62945	-1.75444	0.0114679	0.0205233	1	1679	tags=56%, list=16%, signal=66%
GOBP_NUCLEOBASE_METABOLIC_PROCESS	26	-0.581145	-1.75359	0.00235849	0.0206026	1	1851	tags=46%, list=17%, signal=56%
GOBP_NEGATIVE_REGULATION_OF_DNA_REPAIR	28	-0.567695	-1.75287	0	0.0207131	1	1181	tags=32%, list=11%, signal=36%
GOMF_SINGLE_STRANDED_TELOMERIC_DNA_BINDING	12	-0.711872	-1.74977	0.00881057	0.0213383	1	1637	tags=50%, list=15%, signal=59%
GOBP_ESTABLISHMENT_OF_PROTEIN_LOCALIZATION_TO_TELOMERE	17	-0.647757	-1.74899	0.0111857	0.021438	1	1476	tags=35%, list=14%, signal=41%
GOBP_PYRIMIDINE_NUCLEOSIDE_BIOSYNTHETIC_PROCESS	13	-0.687894	-1.74774	0.00829876	0.0216615	1	1332	tags=54%, list=13%, signal=61%
GOBP_PEPTIDYL_LYSINE_TRIMETHYLATION	39	-0.521097	-1.747	0.00502513	0.0217789	1	3543	tags=56%, list=33%, signal=84%
GOBP_MAINTENANCE_OF_SISTER_CHROMATID_COHESION	12	-0.708671	-1.74395	0.00652174	0.0223856	1	2196	tags=58%, list=21%, signal=73%
GOBP_BLASTOCYST_GROWTH	16	-0.643061	-1.74386	0.0117925	0.0223453	1	610	tags=31%, list=6%, signal=33%
GOBP_MITOCHONDRIAL_DNA_METABOLIC_PROCESS	11	-0.722789	-1.74277	0.00215517	0.0225073	1	1423	tags=55%, list=13%, signal=63%
GOBP_DNA_DAMAGE_RESPONSE_SIGNAL_TRANSDUCTION_BY_P53_CLASS_MEDIATOR	94	-0.434101	-1.74233	0	0.0225373	1	1075	tags=26%, list=10%, signal=28%
GOMF_METAL_CLUSTER_BINDING	56	-0.481495	-1.74219	0.0026178	0.0224996	1	2904	tags=48%, list=27%, signal=66%
GOBP_RNA_DEPENDENT_DNA_BIOSYNTHETIC_PROCESS	64	-0.467153	-1.73999	0	0.0228993	1	2826	tags=38%, list=27%, signal=51%
GOMF_DNA_DIRECTED_DNA_POLYMERASE_ACTIVITY	22	-0.603278	-1.73937	0.00501253	0.0229926	1	1482	tags=45%, list=14%, signal=53%
GOCC_CYCLIN_DEPENDENT_PROTEIN_KINASE_HOLOENZYME_COMPLEX	36	-0.528426	-1.73703	0.00248139	0.0234836	1	731	tags=28%, list=7%, signal=30%
GOBP_NEGATIVE_REGULATION_OF_TELOMERE_MAINTENANCE_VIA_TELOMERE_LENGTHENING	25	-0.559632	-1.73689	0.00941176	0.0234573	1	1407	tags=28%, list=13%, signal=32%
GOCC_ESC_E_Z_COMPLEX	15	-0.647021	-1.73364	0.00915332	0.0241837	1	2391	tags=67%, list=23%, signal=86%
GOBP_TELOMERE_MAINTENANCE_VIA_RECOMBINATION	15	-0.668044	-1.73113	0.00660793	0.0247014	1	2196	tags=53%, list=21%, signal=67%
GOCC_INO80_TYPE_COMPLEX	24	-0.568125	-1.73024	0.0163934	0.0248296	1	3698	tags=71%, list=35%, signal=108%
GOMF_ENDORIBONUCLEASE_ACTIVITY_PRODUCING_5_PHOSPHOMONOESTERS	25	-0.579256	-1.72999	0.00729927	0.0248339	1	2636	tags=44%, list=25%, signal=58%
GOBP_CELLULAR_COMPONENT_DISASSEMBLY_INVOLVED_IN_EXECUTION_PHASE_OF_APOPTOSIS	24	-0.583294	-1.72947	0.0075188	0.0249225	1	1692	tags=33%, list=16%, signal=40%
GOBP_MATURATION_OF_5_8S_RRNA_FROM_TRICISTRONIC_RRNA_TRANSCRIPT_SSU_RRNA_5_8S_RRNA_LSU_RRNA	23	-0.589458	-1.72584	0.00241546	0.0257025	1	2757	tags=57%, list=26%, signal=76%
GOBP_CENTROSOME_SEPARATION	14	-0.667305	-1.7233	0.0119617	0.0262757	1	1225	tags=57%, list=12%, signal=65%
GOMF_G_RICH_STRAND_TELOMERIC_DNA_BINDING	10	-0.756419	-1.72309	0.00707547	0.0262628	1	1637	tags=60%, list=15%, signal=71%
GOMF_RNA_METHYLTRANSFERASE_ACTIVITY	61	-0.470437	-1.72197	0	0.0264881	1	3190	tags=54%, list=30%, signal=77%
GOBP_RNA_LOCALIZATION	208	-0.382374	-1.72109	0	0.0266112	1	3050	tags=44%, list=29%, signal=60%
GOBP_REGULATION_OF_HELICASE_ACTIVITY	12	-0.696428	-1.72101	0.015625	0.0265548	1	1578	tags=50%, list=15%, signal=59%
GOMF_TRANSLATION_REPRESSOR_ACTIVITY_MRNA_REGULATORY_ELEMENT_BINDING	10	-0.737194	-1.72091	0.012605	0.0265076	1	170	tags=30%, list=2%, signal=30%
GOBP_RIBONUCLEOPROTEIN_COMPLEX_SUBUNIT_ORGANIZATION	182	-0.397413	-1.72042	0	0.0265471	1	2938	tags=43%, list=28%, signal=58%
GOBP_POSITIVE_REGULATION_OF_UBIQUITIN_PROTEIN_LIGASE_ACTIVITY	12	-0.695575	-1.71657	0.0111111	0.0275138	1	376	tags=33%, list=4%, signal=35%
GOMF_U6_SNRNA_BINDING	14	-0.645699	-1.7161	0.00235849	0.0275825	1	2099	tags=64%, list=20%, signal=80%
GOBP_TRNA_PROCESSING	121	-0.422027	-1.7146	0	0.027957	1	3642	tags=55%, list=34%, signal=82%
GOCC_EXON_EXON_JUNCTION_COMPLEX	20	-0.588845	-1.71395	0.0140187	0.0280303	1	1857	tags=45%, list=17%, signal=54%
GOBP_MITOCHONDRIAL_GENOME_MAINTENANCE	18	-0.626014	-1.7134	0.00483092	0.0281058	1	1423	tags=39%, list=13%, signal=45%
GOBP_PYRIMIDINE_DEOXYRIBONUCLEOTIDE_METABOLIC_PROCESS	17	-0.627661	-1.71277	0.00230947	0.0281868	1	2053	tags=53%, list=19%, signal=66%
GOBP_UBIQUINONE_METABOLIC_PROCESS	17	-0.637433	-1.7123	0.00966184	0.0282631	1	2755	tags=76%, list=26%, signal=103%
GOBP_PYRIMIDINE_NUCLEOSIDE_TRIPHOSPHATE_BIOSYNTHETIC_PROCESS	15	-0.647246	-1.71169	0.00665188	0.0283517	1	3002	tags=73%, list=28%, signal=102%
GOBP_NEGATIVE_REGULATION_OF_RESPONSE_TO_DNA_DAMAGE_STIMULUS	66	-0.449195	-1.71021	0.00510204	0.0286724	1	2414	tags=44%, list=23%, signal=57%
GOCC_NUCLEAR_UBIQUITIN_LIGASE_COMPLEX	42	-0.503836	-1.70648	0.0078329	0.0295855	1	1251	tags=26%, list=12%, signal=30%
GOBP_TRANSLATIONAL_TERMINATION	103	-0.422524	-1.70592	0	0.0296554	1	4362	tags=69%, list=41%, signal=116%
GOBP_HISTONE_H3_K9_MODIFICATION	34	-0.520852	-1.70509	0.0097561	0.0298144	1	1679	tags=32%, list=16%, signal=38%
GOMF_RNA_POLYMERASE_ACTIVITY	38	-0.503634	-1.70509	0.0100251	0.029737	1	2589	tags=39%, list=24%, signal=52%
GOBP_PYRIMIDINE_CONTAINING_COMPOUND_METABOLIC_PROCESS	59	-0.46931	-1.70501	0.00266667	0.0296835	1	2292	tags=44%, list=22%, signal=56%
GOCC_CENTRIOLAR_SATELLITE	84	-0.443861	-1.70486	0.0027933	0.0296367	1	1501	tags=27%, list=14%, signal=32%
GOBP_FOLIC_ACID_CONTAINING_COMPOUND_METABOLIC_PROCESS	19	-0.610796	-1.70178	0.0189125	0.0304754	1	663	tags=32%, list=6%, signal=34%
GOBP_RIBOSOMAL_SMALL_SUBUNIT_BIOGENESIS	70	-0.447694	-1.70018	0	0.0308532	1	3494	tags=59%, list=33%, signal=87%
GOCC_SPINDLE_POLE_CENTROSOME	12	-0.673079	-1.70001	0.0135135	0.0308144	1	1623	tags=42%, list=15%, signal=49%
GOBP_RRNA_MODIFICATION	33	-0.520223	-1.69874	0.00242718	0.0310887	1	3230	tags=61%, list=30%, signal=87%
GOMF_TRANSFERASE_ACTIVITY_TRANSFERRING_ONE_CARBON_GROUPS	175	-0.390863	-1.69863	0	0.0310242	1	3192	tags=47%, list=30%, signal=66%
GOMF_S_ADENOSYLMETHIONINE_DEPENDENT_METHYLTRANSFERASE_ACTIVITY	135	-0.40649	-1.69832	0	0.0310357	1	3408	tags=52%, list=32%, signal=75%
GOMF_ENDONUCLEASE_ACTIVITY_ACTIVE_WITH_EITHER_RIBO_OR_DEOXYRIBONUCLEIC_ACIDS_AND_PRODUCING_3_PHOSPHOMONOESTERS	11	-0.695978	-1.69744	0.0250569	0.0312239	1	1041	tags=45%, list=10%, signal=50%
GOMF_SNRNA_BINDING	41	-0.50219	-1.69735	0.0027248	0.0311701	1	2099	tags=41%, list=20%, signal=51%
GOBP_POSITIVE_REGULATION_OF_CELL_DIVISION	44	-0.485123	-1.69717	0.0052356	0.0311521	1	593	tags=27%, list=6%, signal=29%
GOBP_PYRIMIDINE_NUCLEOTIDE_METABOLIC_PROCESS	38	-0.498342	-1.69659	0.00478469	0.0312697	1	2292	tags=50%, list=22%, signal=64%
GOBP_REGULATION_OF_EXIT_FROM_MITOSIS	12	-0.686083	-1.69456	0.00218818	0.0317646	1	440	tags=33%, list=4%, signal=35%
GOBP_AROMATIC_AMINO_ACID_FAMILY_METABOLIC_PROCESS	11	-0.692239	-1.69027	0.0130719	0.0330038	1	1947	tags=45%, list=18%, signal=56%
GOBP_CLEAVAGE_INVOLVED_IN_RRNA_PROCESSING	26	-0.556656	-1.68767	0.0100251	0.0336709	1	3080	tags=62%, list=29%, signal=86%
GOBP_REGULATION_OF_TELOMERE_MAINTENANCE_VIA_TELOMERE_LENGTHENING	54	-0.469918	-1.6853	0	0.0343011	1	3484	tags=44%, list=33%, signal=66%
GOCC_U1_SNRNP	18	-0.609123	-1.68463	0.0169082	0.0344116	1	2938	tags=72%, list=28%, signal=100%
GOBP_POSITIVE_REGULATION_OF_MITOTIC_CELL_CYCLE	88	-0.426289	-1.6831	0	0.0347924	1	526	tags=18%, list=5%, signal=19%
GOCC_EXTRINSIC_COMPONENT_OF_MITOCHONDRIAL_INNER_MEMBRANE	11	-0.686511	-1.68131	0.00934579	0.0353023	1	1218	tags=45%, list=11%, signal=51%
GOBP_NEGATIVE_REGULATION_OF_CENTROSOME_DUPLICATION	12	-0.678844	-1.68069	0.0091954	0.0354198	1	2133	tags=75%, list=20%, signal=94%
GOBP_POSITIVE_REGULATION_OF_RESPONSE_TO_DNA_DAMAGE_STIMULUS	90	-0.424893	-1.68021	0.00297619	0.0355015	1	1293	tags=30%, list=12%, signal=34%
GOBP_SPINDLE_LOCALIZATION	42	-0.481083	-1.6801	0.0101781	0.0354609	1	1215	tags=33%, list=11%, signal=37%
GOCC_U2_SNRNP	20	-0.573973	-1.67685	0.0142518	0.036402	1	3476	tags=70%, list=33%, signal=104%
GOBP_PROTEIN_LOCALIZATION_TO_CELL_CORTEX	10	-0.697902	-1.67663	0.013363	0.036376	1	608	tags=40%, list=6%, signal=42%
GOBP_PYRIMIDINE_NUCLEOSIDE_MONOPHOSPHATE_BIOSYNTHETIC_PROCESS	12	-0.672209	-1.6763	0.00961539	0.0363862	1	1332	tags=50%, list=13%, signal=57%
GOBP_INNER_EAR_AUDITORY_RECEPTOR_CELL_DIFFERENTIATION	15	-0.634779	-1.67607	0.0119048	0.0363642	1	1116	tags=47%, list=11%, signal=52%
GOMF_MISMATCHED_DNA_BINDING	11	-0.712255	-1.67517	0.0161663	0.0365575	1	1247	tags=36%, list=12%, signal=41%
GOCC_TELOMERASE_HOLOENZYME_COMPLEX	20	-0.593349	-1.67359	0.00688073	0.0370557	1	2826	tags=50%, list=27%, signal=68%
GOBP_DNA_MODIFICATION	80	-0.422899	-1.67115	0	0.0377714	1	2345	tags=36%, list=22%, signal=46%
GOBP_MITOCHONDRIAL_DNA_REPLICATION	12	-0.667868	-1.66881	0.0224719	0.0384726	1	2754	tags=75%, list=26%, signal=101%
GOBP_PURINE_NUCLEOBASE_BIOSYNTHETIC_PROCESS	10	-0.713971	-1.66837	0.017094	0.0385692	1	1851	tags=60%, list=17%, signal=73%
GOCC_SWR1_COMPLEX	12	-0.67247	-1.66827	0.00677201	0.0385144	1	3388	tags=83%, list=32%, signal=122%
GOBP_PURINE_NUCLEOSIDE_BIOSYNTHETIC_PROCESS	18	-0.59931	-1.66622	0.0136986	0.039177	1	2292	tags=72%, list=22%, signal=92%
GOBP_DNA_DAMAGE_RESPONSE_SIGNAL_TRANSDUCTION_RESULTING_IN_TRANSCRIPTION	16	-0.608934	-1.66479	0.021978	0.039563	1	1208	tags=44%, list=11%, signal=49%
GOBP_CELLULAR_RESPONSE_TO_REACTIVE_NITROGEN_SPECIES	10	-0.699112	-1.66379	0.0153846	0.0398057	1	2033	tags=60%, list=19%, signal=74%
GOBP_ESTABLISHMENT_OF_MITOTIC_SPINDLE_LOCALIZATION	28	-0.518143	-1.6636	0.0118203	0.0397857	1	455	tags=25%, list=4%, signal=26%
GOBP_IRON_SULFUR_CLUSTER_ASSEMBLY	23	-0.566985	-1.66349	0.0114416	0.0397464	1	3453	tags=65%, list=33%, signal=96%
GOBP_RESPONSE_TO_IONIZING_RADIATION	121	-0.403479	-1.66135	0	0.040415	1	1231	tags=26%, list=12%, signal=29%
GOBP_RIBOSOMAL_LARGE_SUBUNIT_BIOGENESIS	68	-0.446298	-1.66011	0.00269542	0.0407643	1	4046	tags=53%, list=38%, signal=85%
GOBP_REGULATION_OF_TELOMERE_MAINTENANCE	73	-0.437931	-1.65942	0	0.0409156	1	3772	tags=47%, list=36%, signal=72%
GOCC_TRANSFERASE_COMPLEX_TRANSFERRING_PHOSPHORUS_CONTAINING_GROUPS	208	-0.371095	-1.65937	0	0.0408372	1	2683	tags=37%, list=25%, signal=49%
GOBP_SYNAPTONEMAL_COMPLEX_ORGANIZATION	10	-0.692955	-1.65876	0.0275862	0.040974	1	769	tags=30%, list=7%, signal=32%
GOBP_POSITIVE_REGULATION_OF_CELL_CYCLE_ARREST	67	-0.440667	-1.65865	0	0.040913	1	1560	tags=31%, list=15%, signal=37%
GOBP_TETRAHYDROFOLATE_METABOLIC_PROCESS	14	-0.638545	-1.65864	0.0134831	0.0408292	1	663	tags=36%, list=6%, signal=38%
GOMF_CYCLIN_DEPENDENT_PROTEIN_SERINE_THREONINE_KINASE_REGULATOR_ACTIVITY	37	-0.500046	-1.6579	0.00483092	0.041004	1	731	tags=27%, list=7%, signal=29%
GOBP_REGULATION_OF_DOUBLE_STRAND_BREAK_REPAIR_VIA_NONHOMOLOGOUS_END_JOINING	22	-0.558282	-1.65726	0.00496278	0.0411682	1	2618	tags=59%, list=25%, signal=78%
GOBP_NEGATIVE_REGULATION_OF_PROTEIN_ACETYLATION	17	-0.602959	-1.65679	0.016055	0.0412416	1	3324	tags=65%, list=31%, signal=94%
GOBP_HISTONE_H3_ACETYLATION	51	-0.467546	-1.65588	0.00824176	0.0415039	1	2860	tags=49%, list=27%, signal=67%
GOBP_METHYLATION	272	-0.358781	-1.65136	0	0.0430112	1	3192	tags=44%, list=30%, signal=61%
GOBP_PTERIDINE_CONTAINING_COMPOUND_METABOLIC_PROCESS	25	-0.539583	-1.64671	0.0170732	0.0446974	1	663	tags=24%, list=6%, signal=26%
GOBP_GUANOSINE_CONTAINING_COMPOUND_BIOSYNTHETIC_PROCESS	10	-0.687416	-1.6461	0.0264901	0.0448231	1	2292	tags=80%, list=22%, signal=102%
GOCC_DNA_REPLICATION_FACTOR_A_COMPLEX	10	-0.69049	-1.64487	0.0287611	0.0451824	1	900	tags=40%, list=8%, signal=44%
GOCC_GAMMA_TUBULIN_COMPLEX	21	-0.559618	-1.64328	0.00934579	0.0456758	1	1792	tags=38%, list=17%, signal=46%
GOMF_ANNEALING_ACTIVITY	13	-0.640479	-1.64239	0.0263789	0.045915	1	69	tags=23%, list=1%, signal=23%
GOBP_ESTABLISHMENT_OF_RNA_LOCALIZATION	175	-0.377617	-1.64222	0	0.0458783	1	3050	tags=43%, list=29%, signal=60%
GOBP_NEGATIVE_REGULATION_OF_RNA_SPLICING	23	-0.546215	-1.64167	0.0141509	0.0459734	1	2415	tags=48%, list=23%, signal=62%
GOBP_PYRIMIDINE_NUCLEOBASE_METABOLIC_PROCESS	13	-0.644749	-1.64151	0.0201794	0.0459237	1	2142	tags=54%, list=20%, signal=67%
GOMF_PROTEIN_SERINE_THREONINE_KINASE_ACTIVATOR_ACTIVITY	30	-0.522666	-1.64126	0.00505051	0.0459263	1	760	tags=23%, list=7%, signal=25%
GOCC_ANAPHASE_PROMOTING_COMPLEX	21	-0.561903	-1.64126	0.0210773	0.0458266	1	2783	tags=57%, list=26%, signal=77%
GOBP_HISTONE_METHYLATION	108	-0.406303	-1.6408	0	0.0459025	1	2533	tags=37%, list=24%, signal=48%
GOBP_POSITIVE_REGULATION_OF_CHROMATIN_BINDING	12	-0.643074	-1.63824	0.0310421	0.046811	1	370	tags=25%, list=3%, signal=26%
GOMF_RIBONUCLEASE_ACTIVITY	85	-0.415739	-1.63427	0	0.0483679	1	2360	tags=39%, list=22%, signal=50%
GOBP_HISTONE_H3_K9_ACETYLATION	10	-0.705726	-1.63341	0.0138568	0.0485751	1	1454	tags=40%, list=14%, signal=46%
GOBP_PEPTIDYL_LYSINE_METHYLATION	101	-0.407209	-1.63323	0	0.0485263	1	3543	tags=52%, list=33%, signal=78%
GOBP_PROTEIN_METHYLATION	140	-0.386157	-1.63294	0	0.0485228	1	3548	tags=51%, list=33%, signal=76%
GOBP_SNO_S_RNA_3_END_PROCESSING	11	-0.649982	-1.63008	0.0215054	0.0495594	1	2118	tags=64%, list=20%, signal=79%
GOBP_IMMUNOGLOBULIN_PRODUCTION_INVOLVED_IN_IMMUNOGLOBULIN_MEDIATED_IMMUNE_RESPONSE	35	-0.49675	-1.62964	0.00987654	0.0496144	1	1679	tags=40%, list=16%, signal=47%
GOBP_RIBOSOMAL_LARGE_SUBUNIT_ASSEMBLY	24	-0.562802	-1.62924	0.0177215	0.0496694	1	2728	tags=46%, list=26%, signal=62%
