# Supplementary material for: Understanding Cell Model Characteristics—RNA Expression Profiling in Primary and Immortalized Human Mesothelial Cells, and in Human Vein and Microvascular Endothelial Cells
Source: Cells. 2022 Oct 5;11(19):3133. doi: 10.3390/cells11193133 (PMC9563025; doi:10.3390/cells11193133)
Supplement: Supplementary file 1 [file cells-11-03133-s001.zip › Supplemental table S7_Endothelium terms.xlsx]

## Sheet: Endothelial GSEA
Endothelial cells (FDR <0.05)		82 up	81 down
Gene Ontology Term	Size	Enrichment Score (ES)	Normalized Enrichment Score (NES)	NOM p-val	FDR q-val	FWER p-val	Rank at Max	Leading Edge
GOBP_SISTER_CHROMATID_SEGREGATION	159	0.603773	2.46555	0	0	0	1439	tags=35%, list=14%, signal=40%
GOBP_MITOTIC_SISTER_CHROMATID_SEGREGATION	139	0.612644	2.44322	0	0	0	1439	tags=37%, list=14%, signal=42%
GOCC_CHROMOSOME_CENTROMERIC_REGION	163	0.600307	2.43543	0	0	0	1508	tags=36%, list=14%, signal=41%
GOBP_NUCLEAR_CHROMOSOME_SEGREGATION	192	0.568129	2.3567	0	0	0	1439	tags=32%, list=14%, signal=37%
GOCC_CONDENSED_CHROMOSOME_CENTROMERIC_REGION	100	0.62455	2.34343	0	0	0	1508	tags=38%, list=14%, signal=44%
GOBP_METAPHASE_PLATE_CONGRESSION	54	0.67788	2.34081	0	0	0	1439	tags=43%, list=14%, signal=49%
GOCC_KINETOCHORE	116	0.597158	2.30619	0	0	0	1508	tags=34%, list=14%, signal=40%
GOBP_REGULATION_OF_CHROMOSOME_SEGREGATION	74	0.634566	2.30513	0	0	0	951	tags=35%, list=9%, signal=38%
GOCC_CHROMOSOMAL_REGION	273	0.528373	2.29006	0	0	0	1508	tags=32%, list=14%, signal=36%
GOBP_CHROMOSOME_SEGREGATION	248	0.533214	2.27944	0	0	0	1463	tags=30%, list=14%, signal=34%
GOCC_CONDENSED_CHROMOSOME	158	0.566119	2.26927	0	0	0	2043	tags=40%, list=19%, signal=49%
GOBP_METAPHASE_ANAPHASE_TRANSITION_OF_CELL_CYCLE	57	0.650348	2.23373	0	8.11343e-05	0.001	561	tags=33%, list=5%, signal=35%
GOBP_REGULATION_OF_CHROMOSOME_SEPARATION	62	0.643612	2.21785	0	0.000150242	0.002	951	tags=37%, list=9%, signal=41%
GOBP_DNA_REPLICATION_INITIATION	34	0.700977	2.20941	0	0.000139511	0.002	738	tags=41%, list=7%, signal=44%
GOBP_MITOTIC_METAPHASE_PLATE_CONGRESSION	45	0.675719	2.20561	0	0.00013021	0.002	1439	tags=40%, list=14%, signal=46%
GOBP_CHROMOSOME_SEPARATION	77	0.600436	2.16165	0	0.00060618	0.01	951	tags=31%, list=9%, signal=34%
GOBP_CHROMOSOME_LOCALIZATION	64	0.6075	2.12429	0	0.00137259	0.024	1439	tags=38%, list=14%, signal=43%
GOBP_SISTER_CHROMATID_COHESION	44	0.638589	2.11491	0	0.00177968	0.033	2043	tags=45%, list=19%, signal=56%
GOBP_DNA_DEPENDENT_DNA_REPLICATION	132	0.533961	2.11211	0	0.00173723	0.034	1843	tags=39%, list=18%, signal=47%
GOBP_NUCLEOSOME_ORGANIZATION	88	0.563173	2.09356	0	0.00286013	0.058	2156	tags=47%, list=20%, signal=58%
GOBP_KINETOCHORE_ORGANIZATION	18	0.788929	2.09174	0	0.00276934	0.059	695	tags=44%, list=7%, signal=48%
GOBP_REGULATION_OF_MITOTIC_SISTER_CHROMATID_SEGREGATION	39	0.658331	2.08328	0	0.00286376	0.064	951	tags=41%, list=9%, signal=45%
GOCC_CONDENSED_CHROMOSOME_OUTER_KINETOCHORE	13	0.843427	2.06698	0	0.00413467	0.094	353	tags=62%, list=3%, signal=64%
GOCC_CONDENSED_NUCLEAR_CHROMOSOME_KINETOCHORE	15	0.802445	2.0657	0	0.0041238	0.097	353	tags=47%, list=3%, signal=48%
GOCC_NUCLEAR_CHROMOSOME	177	0.511705	2.06008	0	0.00454642	0.111	3015	tags=56%, list=29%, signal=78%
GOBP_CHROMOSOME_CONDENSATION	30	0.69182	2.04298	0	0.00609508	0.148	2070	tags=57%, list=20%, signal=70%
GOBP_MITOTIC_NUCLEAR_DIVISION	235	0.484164	2.04241	0	0.0059416	0.15	1439	tags=29%, list=14%, signal=33%
GOCC_U2_TYPE_SPLICEOSOMAL_COMPLEX	91	0.545501	2.03718	0	0.00645441	0.17	3821	tags=67%, list=36%, signal=104%
GOBP_DNA_STRAND_ELONGATION_INVOLVED_IN_DNA_REPLICATION	17	0.75805	2.03226	0	0.0070689	0.191	1269	tags=65%, list=12%, signal=73%
GOBP_NEGATIVE_REGULATION_OF_METAPHASE_ANAPHASE_TRANSITION_OF_CELL_CYCLE	36	0.650304	2.0319	0	0.00689789	0.193	951	tags=39%, list=9%, signal=43%
GOBP_G2_DNA_DAMAGE_CHECKPOINT	31	0.657621	2.02337	0	0.00761577	0.217	522	tags=29%, list=5%, signal=30%
GOBP_CENTROMERE_COMPLEX_ASSEMBLY	33	0.650092	2.00793	0	0.00952599	0.267	1836	tags=48%, list=17%, signal=59%
GOBP_DNA_REPLICATION_CHECKPOINT	14	0.796441	2.00169	0	0.0102704	0.294	482	tags=43%, list=5%, signal=45%
GOMF_DNA_REPLICATION_ORIGIN_BINDING	22	0.70846	1.99823	0	0.0104243	0.303	1843	tags=68%, list=18%, signal=82%
GOCC_SPINDLE_MIDZONE	29	0.672373	1.99743	0	0.0102635	0.306	1359	tags=45%, list=13%, signal=51%
GOBP_PROTEIN_DNA_COMPLEX_SUBUNIT_ORGANIZATION	175	0.487587	1.9944	0	0.0103809	0.316	2156	tags=35%, list=20%, signal=44%
GOBP_MEIOTIC_CHROMOSOME_SEGREGATION	41	0.622341	1.99286	0	0.0104434	0.323	908	tags=34%, list=9%, signal=37%
GOCC_MITOTIC_SPINDLE	123	0.511139	1.98903	0	0.0109378	0.343	1637	tags=33%, list=16%, signal=39%
GOBP_MEIOTIC_CELL_CYCLE_PROCESS	90	0.532963	1.98841	0	0.0107075	0.345	908	tags=27%, list=9%, signal=29%
GOBP_RNA_SPLICING_VIA_TRANSESTERIFICATION_REACTIONS	323	0.453701	1.98526	0	0.0108255	0.359	4009	tags=67%, list=38%, signal=104%
GOBP_DNA_PACKAGING	132	0.513164	1.98037	0	0.0113361	0.38	2212	tags=41%, list=21%, signal=51%
GOBP_POSITIVE_REGULATION_OF_CYTOKINESIS	23	0.692271	1.97938	0	0.0112275	0.383	1423	tags=48%, list=14%, signal=55%
GOBP_THYMIC_T_CELL_SELECTION	10	0.859992	1.97835	0.00227273	0.0111697	0.39	692	tags=50%, list=7%, signal=53%
GOBP_CHROMATIN_ASSEMBLY_OR_DISASSEMBLY	125	0.501608	1.97366	0	0.0118811	0.414	2212	tags=43%, list=21%, signal=54%
GOCC_CMG_COMPLEX	10	0.855109	1.96407	0	0.01347	0.464	1090	tags=90%, list=10%, signal=100%
GOBP_DNA_CONFORMATION_CHANGE	226	0.464407	1.96132	0	0.0135352	0.477	2945	tags=49%, list=28%, signal=66%
GOBP_ATTACHMENT_OF_SPINDLE_MICROTUBULES_TO_KINETOCHORE	30	0.653109	1.96026	0	0.0134949	0.486	1439	tags=43%, list=14%, signal=50%
GOBP_PROTEIN_LOCALIZATION_TO_KINETOCHORE	15	0.771647	1.95611	0	0.0139643	0.507	951	tags=47%, list=9%, signal=51%
GOCC_CATALYTIC_STEP_2_SPLICEOSOME	86	0.533122	1.9518	0	0.0146519	0.528	4112	tags=81%, list=39%, signal=132%
GOBP_CELL_CYCLE_DNA_REPLICATION	55	0.580334	1.94662	0	0.0158121	0.562	1270	tags=42%, list=12%, signal=47%
GOBP_MITOTIC_G2_M_TRANSITION_CHECKPOINT	33	0.628795	1.93639	0	0.0185239	0.628	522	tags=27%, list=5%, signal=29%
GOBP_DOUBLE_STRAND_BREAK_REPAIR_VIA_BREAK_INDUCED_REPLICATION	10	0.846688	1.9319	0	0.0194692	0.654	1090	tags=80%, list=10%, signal=89%
GOBP_DNA_REPLICATION	232	0.456083	1.92803	0	0.0202187	0.681	1878	tags=35%, list=18%, signal=42%
GOCC_DNA_REPLICATION_PREINITIATION_COMPLEX	12	0.808258	1.92351	0.00464037	0.0213539	0.705	1090	tags=83%, list=10%, signal=93%
GOBP_NUCLEOSOME_ASSEMBLY	58	0.574695	1.92231	0	0.021405	0.716	2156	tags=47%, list=20%, signal=58%
GOBP_ANAPHASE_PROMOTING_COMPLEX_DEPENDENT_CATABOLIC_PROCESS	76	0.531681	1.92082	0	0.0214707	0.722	504	tags=13%, list=5%, signal=14%
GOMF_MICROTUBULE_MOTOR_ACTIVITY	41	0.616322	1.91683	0	0.0223172	0.74	579	tags=29%, list=6%, signal=31%
GOBP_ATTACHMENT_OF_MITOTIC_SPINDLE_MICROTUBULES_TO_KINETOCHORE	14	0.766857	1.9139	0.00236407	0.0228012	0.752	276	tags=43%, list=3%, signal=44%
GOBP_POSITIVE_REGULATION_OF_CHROMOSOME_SEGREGATION	13	0.77454	1.9117	0.00238095	0.0231217	0.762	852	tags=46%, list=8%, signal=50%
GOMF_SINGLE_STRANDED_DNA_HELICASE_ACTIVITY	15	0.750343	1.90309	0	0.0256999	0.795	1788	tags=67%, list=17%, signal=80%
GOBP_DNA_REPLICATION_INDEPENDENT_NUCLEOSOME_ORGANIZATION	30	0.635301	1.90031	0.00246305	0.0261178	0.804	2156	tags=53%, list=20%, signal=67%
GOBP_REGULATION_OF_CYTOKINESIS	63	0.544545	1.89656	0	0.0268536	0.817	1423	tags=35%, list=14%, signal=40%
GOCC_KINESIN_COMPLEX	37	0.613171	1.89274	0	0.0279359	0.832	579	tags=27%, list=6%, signal=28%
GOCC_PRONUCLEUS	10	0.816172	1.8912	0	0.0279986	0.833	1504	tags=70%, list=14%, signal=82%
GOBP_MITOTIC_SPINDLE_ORGANIZATION	100	0.49961	1.8777	0	0.0338954	0.894	1359	tags=29%, list=13%, signal=33%
GOBP_ORGANELLE_FISSION	324	0.429397	1.87498	0	0.0345684	0.899	1439	tags=25%, list=14%, signal=28%
GOBP_CHROMATIN_REMODELING_AT_CENTROMERE	24	0.65841	1.87379	0	0.0346167	0.903	1439	tags=46%, list=14%, signal=53%
GOBP_NEGATIVE_REGULATION_OF_CHROMOSOME_ORGANIZATION	79	0.520384	1.87282	0	0.0346646	0.907	1508	tags=32%, list=14%, signal=37%
GOCC_SPINDLE_MICROTUBULE	59	0.538862	1.87268	0	0.0342468	0.908	1520	tags=31%, list=14%, signal=35%
GOBP_HISTONE_H3_K9_ACETYLATION	11	0.776719	1.86722	0.00242718	0.0361288	0.92	793	tags=45%, list=8%, signal=49%
GOMF_MOTOR_ACTIVITY	71	0.516277	1.86653	0	0.0358522	0.92	1107	tags=28%, list=11%, signal=31%
GOBP_PROTEIN_LOCALIZATION_TO_CHROMOSOME_CENTROMERIC_REGION	20	0.687924	1.86524	0.00251256	0.0358379	0.923	951	tags=40%, list=9%, signal=44%
GOBP_MEIOTIC_CELL_CYCLE	122	0.481969	1.86451	0	0.0356923	0.925	1693	tags=31%, list=16%, signal=37%
GOCC_MITOTIC_SPINDLE_POLE	29	0.627846	1.86017	0	0.0373338	0.937	2563	tags=59%, list=24%, signal=77%
GOBP_NEGATIVE_REGULATION_OF_NUCLEAR_DIVISION	42	0.590115	1.85833	0	0.0377178	0.939	951	tags=36%, list=9%, signal=39%
GOMF_ATP_DEPENDENT_MICROTUBULE_MOTOR_ACTIVITY_PLUS_END_DIRECTED	11	0.806192	1.85815	0.00234192	0.0373237	0.939	552	tags=45%, list=5%, signal=48%
GOBP_DNA_STRAND_ELONGATION	23	0.664461	1.84857	0.005291	0.0413589	0.959	1819	tags=61%, list=17%, signal=73%
GOBP_DNA_METHYLATION_OR_DEMETHYLATION	62	0.533237	1.84555	0	0.042348	0.961	1504	tags=32%, list=14%, signal=37%
GOBP_REGULATION_OF_CHROMATIN_SILENCING	10	0.806901	1.84326	0.00236967	0.0430546	0.967	1277	tags=60%, list=12%, signal=68%
GOMF_DNA_SECONDARY_STRUCTURE_BINDING	29	0.612503	1.84118	0.00265252	0.0438166	0.97	1452	tags=41%, list=14%, signal=48%
GOBP_MRNA_EXPORT_FROM_NUCLEUS	103	0.483217	1.83341	0	0.0479442	0.982	3680	tags=58%, list=35%, signal=89%
GOBP_CELLULAR_RESPONSE_TO_CHOLESTEROL	12	0.757604	1.83108	0.00683371	0.0487697	0.984	1065	tags=33%, list=10%, signal=37%
GOBP_EXTERNAL_ENCAPSULATING_STRUCTURE_ORGANIZATION	204	-0.699199	-2.51486	0	0	0	1210	tags=47%, list=11%, signal=52%
GOCC_COLLAGEN_CONTAINING_EXTRACELLULAR_MATRIX	171	-0.712214	-2.49592	0	0	0	1210	tags=54%, list=11%, signal=60%
GOMF_EXTRACELLULAR_MATRIX_STRUCTURAL_CONSTITUENT	78	-0.769431	-2.43798	0	0	0	1210	tags=69%, list=11%, signal=78%
GOCC_EXTERNAL_ENCAPSULATING_STRUCTURE	208	-0.673926	-2.40108	0	0	0	1210	tags=50%, list=11%, signal=55%
GOCC_ENDOPLASMIC_RETICULUM_LUMEN	175	-0.66163	-2.32526	0	0	0	1386	tags=43%, list=13%, signal=49%
GOCC_BASEMENT_MEMBRANE	48	-0.784602	-2.3131	0	0	0	1210	tags=69%, list=11%, signal=77%
GOCC_COLLAGEN_TRIMER	29	-0.85371	-2.26435	0	0	0	434	tags=62%, list=4%, signal=65%
GOBP_CELL_SUBSTRATE_ADHESION	235	-0.626159	-2.25838	0	0	0	1064	tags=32%, list=10%, signal=35%
GOBP_CELL_MATRIX_ADHESION	150	-0.645694	-2.21119	0	0	0	1064	tags=29%, list=10%, signal=32%
GOMF_COLLAGEN_BINDING	42	-0.76453	-2.19417	0	0	0	897	tags=55%, list=9%, signal=60%
GOMF_FIBRONECTIN_BINDING	19	-0.885675	-2.18437	0	0	0	1064	tags=79%, list=10%, signal=88%
GOBP_INTEGRIN_MEDIATED_SIGNALING_PATHWAY	68	-0.686093	-2.15034	0	8.43419e-05	0.001	1000	tags=38%, list=10%, signal=42%
GOBP_POSITIVE_REGULATION_OF_AXON_EXTENSION	30	-0.806938	-2.14643	0	7.78541e-05	0.001	78	tags=17%, list=1%, signal=17%
GOBP_REGULATION_OF_COLLAGEN_METABOLIC_PROCESS	24	-0.809452	-2.12807	0	7.22931e-05	0.001	641	tags=46%, list=6%, signal=49%
GOMF_SULFUR_COMPOUND_BINDING	124	-0.623572	-2.12679	0	0.000135524	0.002	1167	tags=31%, list=11%, signal=35%
GOMF_HEPARIN_BINDING	56	-0.697876	-2.10004	0	0.000191321	0.003	1167	tags=48%, list=11%, signal=54%
GOBP_COLLAGEN_BIOSYNTHETIC_PROCESS	27	-0.778105	-2.09807	0	0.000239928	0.004	641	tags=41%, list=6%, signal=43%
GOMF_INTEGRIN_BINDING	80	-0.657814	-2.093	0	0.000283377	0.005	1023	tags=45%, list=10%, signal=49%
GOMF_EXTRACELLULAR_MATRIX_STRUCTURAL_CONSTITUENT_CONFERRING_TENSILE_STRENGTH	19	-0.850765	-2.0631	0	0.00101609	0.019	658	tags=68%, list=6%, signal=73%
GOMF_PROTEASE_BINDING	85	-0.640659	-2.04847	0	0.00152409	0.03	930	tags=26%, list=9%, signal=28%
GOBP_REGULATION_OF_CELL_SUBSTRATE_ADHESION	148	-0.587323	-2.0282	0	0.00304681	0.062	1064	tags=29%, list=10%, signal=32%
GOMF_CELL_ADHESION_MEDIATOR_ACTIVITY	36	-0.721122	-2.00413	0	0.00499216	0.104	719	tags=33%, list=7%, signal=36%
GOBP_EXTRACELLULAR_MATRIX_ASSEMBLY	29	-0.757582	-2.00114	0	0.00535059	0.115	1054	tags=41%, list=10%, signal=46%
GOBP_COLLAGEN_METABOLIC_PROCESS	57	-0.661853	-1.99998	0	0.00525424	0.118	641	tags=32%, list=6%, signal=33%
GOBP_HETEROTYPIC_CELL_CELL_ADHESION	25	-0.766048	-1.99448	0	0.00549178	0.127	622	tags=36%, list=6%, signal=38%
GOBP_OSSIFICATION	225	-0.552442	-1.99187	0	0.00578886	0.138	1259	tags=28%, list=12%, signal=31%
GOBP_POSITIVE_REGULATION_OF_CELL_SUBSTRATE_ADHESION	80	-0.618734	-1.9855	0	0.00632837	0.154	1064	tags=36%, list=10%, signal=40%
GOCC_LYSOSOMAL_LUMEN	63	-0.647649	-1.97427	0	0.00798968	0.199	1954	tags=51%, list=19%, signal=62%
GOBP_OSTEOBLAST_DIFFERENTIATION	129	-0.582091	-1.97268	0	0.00785289	0.203	883	tags=22%, list=8%, signal=23%
GOBP_AMINOGLYCAN_BIOSYNTHETIC_PROCESS	62	-0.640096	-1.95907	0.00150376	0.0101046	0.263	1156	tags=26%, list=11%, signal=29%
GOBP_PROTEOGLYCAN_METABOLIC_PROCESS	52	-0.665831	-1.956	0	0.0107924	0.289	933	tags=27%, list=9%, signal=29%
GOBP_PLATELET_DEGRANULATION	76	-0.62398	-1.9544	0	0.0106781	0.293	1837	tags=45%, list=17%, signal=54%
GOCC_EXTERNAL_SIDE_OF_PLASMA_MEMBRANE	109	-0.589449	-1.95337	0	0.0107545	0.301	971	tags=38%, list=9%, signal=41%
GOBP_COLLAGEN_FIBRIL_ORGANIZATION	30	-0.733072	-1.945	0	0.0124113	0.345	773	tags=43%, list=7%, signal=47%
GOBP_TYPE_B_PANCREATIC_CELL_PROLIFERATION	11	-0.883698	-1.93381	0	0.0153926	0.414	472	tags=45%, list=4%, signal=48%
GOCC_CELL_SURFACE	328	-0.518215	-1.93195	0	0.0154438	0.424	930	tags=29%, list=9%, signal=30%
GOCC_LAMELLIPODIUM_MEMBRANE	16	-0.836522	-1.93147	0	0.015163	0.427	930	tags=63%, list=9%, signal=68%
GOBP_POSITIVE_REGULATION_OF_EXTRACELLULAR_MATRIX_ORGANIZATION	18	-0.790249	-1.93074	0	0.0149784	0.432	1197	tags=44%, list=11%, signal=50%
GOMF_GLYCOSAMINOGLYCAN_BINDING	83	-0.596283	-1.92553	0	0.0161886	0.464	1167	tags=41%, list=11%, signal=46%
GOCC_COMPLEX_OF_COLLAGEN_TRIMERS	11	-0.875198	-1.92342	0.00180505	0.0165721	0.479	658	tags=82%, list=6%, signal=87%
GOCC_PLASMA_MEMBRANE_PROTEIN_COMPLEX	213	-0.535753	-1.92307	0	0.0163408	0.481	1212	tags=28%, list=12%, signal=31%
GOBP_INTERLEUKIN_17_PRODUCTION	14	-0.837551	-1.91764	0	0.0175018	0.508	586	tags=43%, list=6%, signal=45%
GOBP_T_CELL_MIGRATION	30	-0.691546	-1.90908	0	0.0200746	0.561	586	tags=30%, list=6%, signal=32%
GOMF_CYTOKINE_ACTIVITY	44	-0.663887	-1.9068	0.0015361	0.0202431	0.571	619	tags=45%, list=6%, signal=48%
GOCC_PLATELET_ALPHA_GRANULE	55	-0.630575	-1.90588	0	0.0201551	0.578	1477	tags=36%, list=14%, signal=42%
GOBP_NEGATIVE_REGULATION_OF_CELL_ADHESION	165	-0.549997	-1.90418	0	0.0204695	0.593	648	tags=21%, list=6%, signal=22%
GOBP_MUSCLE_ORGAN_MORPHOGENESIS	33	-0.6897	-1.90132	0	0.0211382	0.612	820	tags=39%, list=8%, signal=43%
GOBP_REGULATION_OF_HEART_RATE	33	-0.674739	-1.90018	0.00159744	0.0211212	0.621	865	tags=30%, list=8%, signal=33%
GOBP_CHEMOKINE_C_X_C_MOTIF_LIGAND_2_PRODUCTION	11	-0.871126	-1.89565	0	0.022743	0.664	400	tags=36%, list=4%, signal=38%
GOMF_CALCIUM_ION_BINDING	282	-0.513101	-1.88906	0	0.024913	0.708	1649	tags=37%, list=16%, signal=43%
GOBP_MUSCLE_CONTRACTION	142	-0.546193	-1.88408	0	0.0269767	0.748	1395	tags=33%, list=13%, signal=38%
GOBP_REGULATION_OF_FATTY_ACID_OXIDATION	17	-0.7745	-1.88188	0	0.0275133	0.763	1818	tags=65%, list=17%, signal=78%
GOBP_SUBSTRATE_ADHESION_DEPENDENT_CELL_SPREADING	81	-0.585602	-1.87966	0	0.0283394	0.776	1023	tags=31%, list=10%, signal=34%
GOCC_PLASMA_MEMBRANE_SIGNALING_RECEPTOR_COMPLEX	74	-0.598848	-1.87538	0	0.0296228	0.794	699	tags=30%, list=7%, signal=32%
GOBP_ZYMOGEN_ACTIVATION	30	-0.682782	-1.87496	0	0.0292327	0.795	1465	tags=37%, list=14%, signal=42%
GOBP_INSULIN_LIKE_GROWTH_FACTOR_RECEPTOR_SIGNALING_PATHWAY	19	-0.754423	-1.87492	0	0.0287106	0.795	670	tags=32%, list=6%, signal=34%
GOCC_PROTEIN_COMPLEX_INVOLVED_IN_CELL_ADHESION	19	-0.776343	-1.8735	0	0.0289398	0.803	1208	tags=68%, list=11%, signal=77%
GOBP_CELL_CELL_ADHESION_VIA_PLASMA_MEMBRANE_ADHESION_MOLECULES	99	-0.566256	-1.87149	0	0.0293885	0.813	792	tags=36%, list=8%, signal=39%
GOBP_REGULATION_OF_EXTRACELLULAR_MATRIX_ORGANIZATION	32	-0.694977	-1.87086	0	0.0292531	0.815	1197	tags=44%, list=11%, signal=49%
GOCC_PLATELET_ALPHA_GRANULE_LUMEN	37	-0.668397	-1.86447	0.0016129	0.0318683	0.843	1477	tags=38%, list=14%, signal=44%
GOBP_REGULATION_OF_EXTRACELLULAR_MATRIX_DISASSEMBLY	11	-0.852328	-1.86144	0	0.0330432	0.853	873	tags=45%, list=8%, signal=50%
GOBP_CHONDROITIN_SULFATE_PROTEOGLYCAN_METABOLIC_PROCESS	26	-0.69961	-1.86131	0.00490196	0.0325755	0.854	933	tags=31%, list=9%, signal=34%
GOBP_PROTEOGLYCAN_BIOSYNTHETIC_PROCESS	39	-0.661999	-1.85534	0	0.0353683	0.877	933	tags=23%, list=9%, signal=25%
GOBP_MUSCLE_SYSTEM_PROCESS	194	-0.520707	-1.85467	0	0.0353076	0.878	1395	tags=30%, list=13%, signal=34%
GOBP_LEUKOCYTE_MIGRATION	207	-0.515391	-1.85458	0	0.0347644	0.878	747	tags=25%, list=7%, signal=26%
GOBP_POSITIVE_REGULATION_OF_COLLAGEN_METABOLIC_PROCESS	16	-0.795123	-1.85411	0.00166113	0.0345144	0.882	641	tags=44%, list=6%, signal=47%
GOBP_MUSCLE_ORGAN_DEVELOPMENT	156	-0.52937	-1.85014	0	0.0364865	0.9	881	tags=20%, list=8%, signal=21%
GOBP_NEGATIVE_REGULATION_OF_ENDOPLASMIC_RETICULUM_STRESS_INDUCED_INTRINSIC_APOPTOTIC_SIGNALING_PATHWAY	14	-0.787864	-1.84996	0.00502513	0.0360401	0.901	1055	tags=50%, list=10%, signal=55%
GOBP_PEPTIDE_CROSS_LINKING	10	-0.880407	-1.84685	0	0.0375396	0.917	78	tags=30%, list=1%, signal=30%
GOBP_EXOCRINE_SYSTEM_DEVELOPMENT	18	-0.766849	-1.84648	0.00162602	0.0373371	0.922	773	tags=39%, list=7%, signal=42%
GOMF_PROTEOGLYCAN_BINDING	19	-0.733178	-1.83973	0.00164474	0.0405358	0.942	266	tags=42%, list=3%, signal=43%
GOBP_AMINOGLYCAN_METABOLIC_PROCESS	90	-0.569965	-1.83867	0	0.0406087	0.948	1156	tags=26%, list=11%, signal=28%
GOBP_REGULATION_OF_BLOOD_CIRCULATION	104	-0.552632	-1.83742	0	0.0407889	0.952	1521	tags=38%, list=14%, signal=43%
GOBP_POSITIVE_REGULATION_OF_CELL_ADHESION	231	-0.509078	-1.83644	0	0.0408429	0.954	1207	tags=32%, list=11%, signal=35%
GOMF_WNT_PROTEIN_BINDING	16	-0.7612	-1.83588	0.00170068	0.0408	0.956	1111	tags=44%, list=11%, signal=49%
GOBP_NEGATIVE_REGULATION_OF_CELL_MATRIX_ADHESION	29	-0.686539	-1.83548	0.00158983	0.0405843	0.956	327	tags=17%, list=3%, signal=18%
GOCC_RECEPTOR_COMPLEX	165	-0.527764	-1.83442	0	0.0407166	0.96	873	tags=26%, list=8%, signal=28%
GOBP_REGULATION_OF_CELLULAR_CARBOHYDRATE_METABOLIC_PROCESS	90	-0.558346	-1.82134	0	0.0490309	0.976	1321	tags=23%, list=13%, signal=26%
GOBP_POSITIVE_REGULATION_OF_CELL_GROWTH	100	-0.553086	-1.81986	0	0.0496087	0.977	656	tags=13%, list=6%, signal=14%
GOCC_SIDE_OF_MEMBRANE	234	-0.504852	-1.81888	0	0.0496621	0.98	1462	tags=29%, list=14%, signal=33%
GOBP_REGULATION_OF_CELL_MATRIX_ADHESION	87	-0.577394	-1.81714	0	0.0499275	0.983	1692	tags=31%, list=16%, signal=37%
